# Supplementary material
Source: PubMed Central journal article supplement (PMC4030799)
Supplement: cn500054n_si_001.pdf [file cn500054n_si_001.pdf]

## Supporting Information

# The first CNS-active carborane: A novel P2X<sub>7</sub> receptor antagonist with antidepressant activity.

Shane M. Wilkinson, Hendra Gunosewoyo, Melissa L. Barron, Aurelie Boucher, Michelle McDonnell, Peter Turner, Daniel E. Morrison, Maxwell R. Bennett, Iain S. McGregor, Louis M. Rendina,\* Michael Kassiou\*

School of Chemistry, University of Sydney, NSW, 2006, Australia

[michael.kassiou@sydney.edu.au](mailto:michael.kassiou@sydney.edu.au), [lou.rendina@sydney.edu.au](mailto:lou.rendina@sydney.edu.au)

|                                                                                                      |           |
|------------------------------------------------------------------------------------------------------|-----------|
| <b>SYNTHESIS EXPERIMENTAL</b> .....                                                                  | <b>2</b>  |
| GENERAL EXPERIMENTAL .....                                                                           | 2         |
| SYNTHESIS OF THE 2-CHLORO-5-METHOXYBENZOIC ACID (7) .....                                            | 3         |
| SYNTHESIS OF ADAMANTANYL BENZAMIDE (1).....                                                          | 4         |
| SYNTHESIS OF CUBANYL BENZAMIDE (2) .....                                                             | 5         |
| SYNTHESIS OF TRISHOMOCUBANYL BENZAMIDE (3).....                                                      | 7         |
| SYNTHESIS OF <i>CLOSO O</i> -CARBORANYL BENZAMIDE 4 AND <i>NIDO O</i> -CARBORANYL BENZAMIDE (5)..... | 9         |
| <b>LIPOPHILICITY MEASUREMENTS</b> .....                                                              | <b>11</b> |
| GENERAL EXPERIMENTAL .....                                                                           | 11        |
| STANDARDS CALIBRATION CURVE.....                                                                     | 11        |
| SAMPLE LIPOPHILICITY MEASUREMENTS.....                                                               | 11        |
| <b>DYE UPTAKE ASSAY</b> .....                                                                        | <b>12</b> |
| GENERAL EXPERIMENTAL .....                                                                           | 12        |
| CELL CULTURE .....                                                                                   | 12        |
| YO-PRO UPTAKE ASSAY FOR PORE FORMATION.....                                                          | 12        |
| <b>FORCED SWIM TEST</b> .....                                                                        | <b>14</b> |
| ANIMALS AND DRUG TREATMENT .....                                                                     | 14        |
| TOLERABILITY STUDY.....                                                                              | 14        |
| FORCED SWIM TEST (FST).....                                                                          | 14        |
| <b><sup>1</sup>H AND <sup>13</sup>C NMR SPECTRA</b> .....                                            | <b>15</b> |
| <b>X-RAY CRYSTAL STRUCTURE EXPERIMENTAL</b> .....                                                    | <b>27</b> |
| CUBANYL BENZAMIDE 2.....                                                                             | 27        |
| <i>CLOSO O</i> -CARBORANYL BENZAMIDE 4.....                                                          | 33        |
| <b>REFERENCES</b> .....                                                                              | <b>46</b> |

## Synthesis Experimental

### General experimental

Melting points were determined using a Stuart SMP10 Melting Point Apparatus and are uncorrected.

Infrared absorption (IR) spectra were obtained using a Bruker ALPHA FT-IR spectrometer with (neat) samples pressed against a selenium-zinc cell (SeZn). Significant absorbance bands are reported in wavenumbers ( $\text{cm}^{-1}$ ) and are described by the abbreviations: br = broad, s = strong, m = medium, w = weak. Where applicable, bands are also assigned their respective functional group.

$^1\text{H}$  Nuclear Magnetic Resonance ( $^1\text{H}$  NMR) spectra were obtained on a Bruker DRX400 (400 MHz) or AVANCE III 500 Ascend (500 MHz) at 300 K unless otherwise stated. Chemical shift data is expressed in ppm relative to  $\delta_{\text{TMS}} = 0$ , using residual protons in deuterated solvent as an internal reference. The data is reported as chemical shift ( $\delta$ ), relative integral, observed multiplicity (s = singlet, d = doublet, dd = doublet of doublets, quart = quartet, quint = quintet, m = multiplet), coupling constant(s) ( $J$  Hz) and assignment (unassigned diastereotopic protons are allocated lower case letters e.g. a, b, etc.). All multiplicities and coupling constants are apparent. Assignment of signals was assisted by 2D multiplicity-edited HSQC and HMBC experiments where necessary.

$^{13}\text{C}$  Nuclear Magnetic Resonance ( $^{13}\text{C}$  NMR) spectra were obtained on a Bruker DRX400 (100 MHz) or AVANCE III 500 Ascend (125 MHz) at 300 K with complete proton decoupling unless otherwise stated. Chemical shift data is expressed in ppm relative to  $\delta_{\text{TMS}} = 0$ , using deuterated solvent as an internal reference. The data is reported as chemical shift ( $\delta$ ), and assignment. The protonicity ( $\text{CH}_3$  = primary,  $\text{CH}_2$  = secondary,  $\text{CH}$  = tertiary,  $\text{C}_q$  = quaternary carbon,  $\text{C}_{\text{Ar}}$  = aromatic carbon) and assignment of signals was assisted by 2D multiplicity-edited HSQC and HMBC experiments where necessary.

Low resolution mass spectra (LRMS) was obtained from a ThermoQuest Finnigan LCQ Deca ion trap mass spectrometer with electro-spray ionization in either positive (+ESI) or negative (-ESI) mode or atmospheric-pressure chemical ionization in positive mode (+APCI). Gas chromatography with mass spectrometer (GC-MS) was performed on a ThermoQuest Finnigan PolarisQ mass spectrometer attached to a Trace 2000 GC. Data is expressed as observed mass ( $m/z$ ), assignment ( $M$  = molecular ion), and relative intensity (%).

Elemental analysis was determined in duplicate using a PerkinElmer PE2400 Elemental Analyzer (CHNS) at Macquarie University, NSW, Australia and are uncorrected.

Analytical thin layer chromatography (TLC) was performed using 0.2 mm thick, aluminum-backed, pre-coated silica gel plates (Merck Silica gel 60  $\text{F}_{254}$ ). Compounds were visualized by short and long wavelength ultra-violet fluorescence and by staining with potassium permanganate (40 g potassium carbonate, 6 g potassium permanganate, 600 mL  $\text{H}_2\text{O}$  then 5 mL of 10% NaOH).

Normal-phase Flash chromatography was performed using Merck Silica gel 60 (230 – 400 mesh ASTM), under a positive pressure of  $\text{N}_2$ , with the indicated solvents. Solvent compositions were mixed volume per volume (v/v) as specified.

Evaporation or concentration under reduced pressure refers to evaporation using a rotary evaporator connected to a vacuum pump. Removal of residual solvent when necessary was achieved by evacuation (0.01 - 0.1 mm Hg) with a high stage oil sealed vacuum pump.

All solvents and reagents were dried and purified when necessary according to published standard procedures.<sup>1</sup> Tetrahydrofuran was dried over sodium wire (determined by benzophenone) and distilled. Dichloromethane and boron trifluoride diethyl etherate were distilled from calcium hydride at ambient pressure. Hexanes refers to hexanes (bp 65 – 69 °C) and brine refers to saturated aqueous sodium chloride solution. Moisture sensitive reactions were carried out in oven dried glassware under a dry inert atmosphere of  $\text{N}_2$  or Ar. Reaction temperatures were controlled using ice : water (0 – 5 °C) cooling baths or oil heating baths (> room temperature). Room temperature ranges from 18-25 °C.

### Synthesis of the 2-chloro-5-methoxybenzoic acid (**9**)

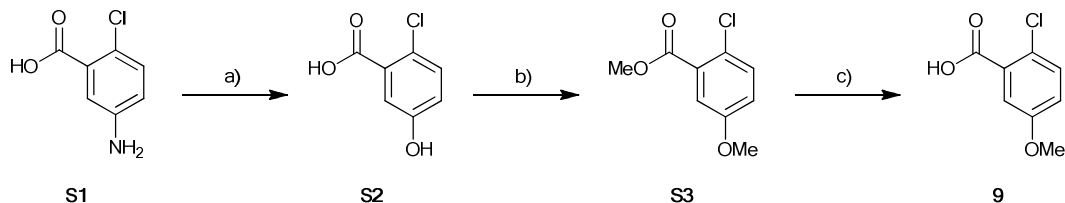

**Scheme 1** Conditions: a) H<sub>2</sub>SO<sub>4</sub>, NaNO<sub>2</sub>, <5 °C, 1h, then H<sub>2</sub>O, 65 °C, 0.5 h, 72%; b) MeI, K<sub>2</sub>CO<sub>3</sub>, DMF, 40 °C, 95%; c) LiOH, THF/H<sub>2</sub>O, Δ, 76%

**2-Chloro-5-hydroxybenzoic acid (S2).** 5-Amino-2-chlorobenzoic acid **S1** (2.60 g, 15.2 mmol) was suspended in aq. H<sub>2</sub>SO<sub>4</sub> (1.25% v/v, 240 mL) and cooled below 5 °C with an ice bath. A solution of NaNO<sub>2</sub> (1.55 g, 225 mmol) in H<sub>2</sub>O (45 mL) was added dropwise to maintain a reaction temperature below 5 °C. The reaction was stirred until all solids had dissolved and a clear solution resulted (~1 hr). The reaction was poured into hot H<sub>2</sub>O (450 mL, 65 °C) and decolorizing charcoal (2 g) was added. The mixture was refluxed for 0.5 h, then cooled to room temperature and filtered. The filtrate was extracted with EtOAc (3 x 300 mL) and combined and dried over anhyd. Na<sub>2</sub>SO<sub>4</sub>. The solvent was removed by rotary evaporation to give crude 2-chloro-5-hydroxybenzoic acid **S2** (1.88 g, 71.5%) as a light brown solid. **M.P.** 174-177 °C (lit. M.P. 186-189 °C)<sup>2</sup>; **IR** (ZnSe cell): 3302 (broad, O-H), 1693, 1656, 1569, 1432, 1212, 660 cm<sup>-1</sup>; **<sup>1</sup>H NMR** (300 MHz, *d*<sub>6</sub>-DMSO): δ 13.23 (1H, s, broad, CO<sub>2</sub>H), 9.95 (1H, s, broad, ArOH), 7.29 (1H, d, *J*<sub>H3-H4</sub> 8.7, H3), 7.15 (1H, d, *J*<sub>H4-H6</sub> 3.0, H6), 6.90 (1H, dd, *J*<sub>H3-H4</sub> 8.7, *J*<sub>H4-H6</sub> 3.0, H4); **<sup>13</sup>C NMR** (75 MHz, *d*<sub>6</sub>-DMSO): δ 166.6 (C7), 156.1 (C5), 132.0 (C1), 131.5 (C3), 121.0 (C2), 119.6, 117.2; **LRMS (-ESI)**: *m/z* 343 ([2M-H]<sup>-</sup>, 100%), 171 ([M-H]<sup>-</sup>, 37%). The spectroscopic data matched that reported in the literature.<sup>3</sup>

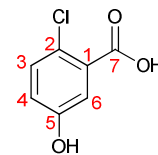

**Methyl 2-chloro-5-methoxybenzoate (S3).** Iodomethane (3.0 mL, 49 mmol) was added to 2-chloro-5-hydroxybenzoic acid **S2** (1.5 g, 8.7 mmol) and K<sub>2</sub>CO<sub>3</sub> (5.3g, 39 mmol) in DMF (75 mL). The reaction mixture was heated at 40 °C for 20 h under a N<sub>2</sub> atmosphere, then cooled to RT and quenched with H<sub>2</sub>O (150 mL). The ester was extracted with Et<sub>2</sub>O (3 x 100 mL) with the organic layers combined and washed with aq. NaOH (0.1 M, 150 mL), then H<sub>2</sub>O (2 x 100 mL), and then dried over anhyd. MgSO<sub>4</sub>. The solvent was removed under vacuo to yield the brown oil of methyl 2-chloro-5-methoxybenzoate **S3** (1.67 g, 95%). **IR** (ZnSe cell): 2953 (w, C-H), 2841 (w, C-H), 1731 (s, C=O), 1478 (m), 1433 (m), 1288 (s), 1218 (s, C-O), 1114 (s), 1055 (s), 1025 (s), 816 (m), 777 (m), 642 (m, C-Cl) cm<sup>-1</sup>; **<sup>1</sup>H NMR** (300 MHz, CDCl<sub>3</sub>): δ 7.35-7.28 (2H, m, H5, H8), 6.94 (1H, dd, *J*<sub>H5-H6</sub> 9.0, *J*<sub>H6-H8</sub> 3.0, H6), 3.91 (3H, s, H1), 3.80 (3H, s, H9); **<sup>13</sup>C NMR** (75 MHz, CDCl<sub>3</sub>): δ 166.1 (C2), 158.0 (C7), 131.9 (Ar-H), 130.7 (C3), 125.0 (C4), 119.0 (ArH), 116.1 (ArH), 55.8 (C9), 52.5 (C1) ppm.

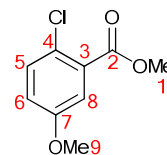

**2-Chloro-5-methoxybenzoic acid (9).** Methyl 2-chloro-5-methoxybenzoate **S3** (1.62 g, 8.07 mmol) was dissolved in THF (30 mL) and aq. LiOH (1 M, 40 mL) was added. The solution was heated at reflux for 4 h, then stirred overnight (~16 h). The solution was reduced to half by rotary evaporation then aq. HCl (6 M) was added until pH 1. The resulting white precipitate was extracted into CH<sub>2</sub>Cl<sub>2</sub> (2 x 150 mL). The organic layers were combined, dried over anhyd. MgSO<sub>4</sub> and evaporated to dryness. The resulting brown gum was recrystallized from H<sub>2</sub>O (~200-250 mL) resulting in the tan-colored powder of 2-chloro-5-methoxybenzoic acid **9** (1.145 g, 76%). **M.P.** 178-180 °C (lit. M.P. 178-181 °C)<sup>3</sup>; **<sup>1</sup>H NMR** (400 MHz, DMSO-*d*<sub>6</sub>): δ 13.48 (1H, s, broad, CO<sub>2</sub>H), 7.43 (1H, d, *J*<sub>H4-H5</sub> 8.8, H4), 7.28 (1H, d, *J*<sub>H5-H7</sub> 2.4, H7), 7.10 (1H, dd, *J*<sub>H4-H5</sub> 8.8, *J*<sub>H5-H7</sub> 2.8, H5), 3.78 (3H, s, H8); **<sup>13</sup>C NMR** (75 MHz, DMSO-*d*<sub>6</sub>): δ 166.7 (C1), 157.8 (C6), 132.4 (C2), 131.6 (C4), 122.7 (C3), 118.5 (C5), 115.5 (C7), 55.7 (C8) ppm. The spectroscopic data matched that reported in the literature.<sup>3</sup>

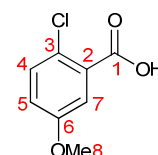

## Synthesis of adamantanyl benzamide (1)

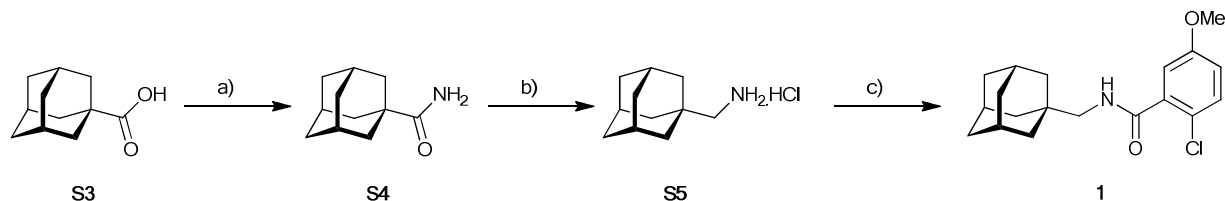

**Scheme 2.** a) CDI, THF, rt, 1 h, then 28% NH<sub>3(aq)</sub>, rt, 4 h 97%; b) LiAlH<sub>4</sub>, THF, reflux, 20 h, then HCl, 89%; c) 2-chloro-5-methoxybenzoic acid **9**, (COCl)<sub>2</sub>, THF, rt, 1 h, then amine **S5**, THF, Et<sub>3</sub>N, rt, 16 h, 72%

**1-Adamantanecarboxamide (S4).** 1-Adamantanecarboxylic acid **S3** (5.0 g, 27.7 mmol) and 1,1'-carbonyldiimidazole (5.4 g, 33.3 mmol) were stirred for 1 h at room temperature in THF (100 mL) under a N<sub>2</sub> atmosphere. The reaction was cooled on ice then aq. NH<sub>3</sub> (28%, 14 mL) was added. The reaction was stirred for 4 h, allowing the solution to warm to room temperature. The solvent was removed by rotary evaporation and the residue dissolved in CH<sub>2</sub>Cl<sub>2</sub> (350 mL) and washed with NaOH (1 M, 150 mL), then HCl (1 M, 150 mL) and then H<sub>2</sub>O (150 mL). The organic layer was dried over anhyd. MgSO<sub>4</sub> and evaporated to dryness to yield 1-adamantanecarboxamide **S4** (4.80 g, 97%) as a colorless solid. This product was used in the next step without any further purification. **M.P.** 190-192 °C (lit. M.P. 186-192 °C)<sup>4</sup>; **<sup>1</sup>H NMR** (400 MHz, *d*<sub>6</sub>-DMSO): δ 6.90 (1H, br s, NH), 6.64 (1H, br s, NH), 1.94 (3 H, br s, H4), 1.74 (6H, d, *J* = 2.8, H3), 1.64 (6H, m, H5) ppm; **<sup>13</sup>C NMR** (100 MHz, *d*<sub>6</sub>-DMSO): δ 179.2 (C1), 39.63 (C2), 38.74 (3C, C3), 36.16 (3C, C5), 27.66 (3C, C4) ppm.

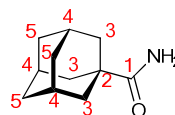

**Adamantan-1-ylmethylamine hydrochloride (S5).** A solution of 1-adamantanecarboxamide **S4** (4.78 g, 26.7 mmol) in THF (110 mL) was treated with LiAlH<sub>4</sub> (3.92 g, 103 mmol) at 0 °C and stirred under a N<sub>2</sub> atmosphere whilst warming to room temperature. After 2 h, the reaction was heated at reflux for 16 h and then cooled on ice. Chilled H<sub>2</sub>O (4 mL) was added dropwise, with vigorous stirring, and then followed by NaOH (15% w/v, 4 mL) and additional H<sub>2</sub>O (12 mL). The solution was left stirring at room temperature until effervescence had ceased and the grey powder had turned white (30 min). The solution was dried with anhyd. MgSO<sub>4</sub> and filtered. The precipitate was washed with CH<sub>2</sub>Cl<sub>2</sub> (2 x 100 mL). The filtrate in each case were combined and evaporated by rotary evaporation to yield a yellow-orange oil (4.20 g). This residue was dissolved in Et<sub>2</sub>O (30 mL), washed with NaOH (1 M, 10 mL) and then H<sub>2</sub>O (10 mL) before drying over anhyd. MgSO<sub>4</sub>. The MgSO<sub>4</sub> was removed by filtration and the resulting filtrate was treated with HCl in dioxane (4 M, 10 mL). The resulting white precipitate was collected by filtration and washed with Et<sub>2</sub>O to yield adamantan-1-ylmethylamine hydrochloride **S5** (4.811 g, 89%) as a colorless powder. **M.P.** 360-370 °C; **IR** (ZnSe cell): 2899, 2845 (C-H), 1093 (C-N); **<sup>1</sup>H NMR** (300 MHz, CDCl<sub>3</sub>): δ 8.29 (3H, br s, NH<sub>3</sub><sup>+</sup>), 2.65 (2H, q, *J* = 6 Hz, H1), 2.03 (3H, br s, H4), 1.80-1.55 (12 H, m, H3, H5) ppm; **<sup>13</sup>C NMR** (75 MHz, CDCl<sub>3</sub>): δ 51.3 (C1), 39.8 (3C), 36.6 (3C), 32.2 (C2), 28.0 (3C) ppm; **HRMS** (+ESI): Calc. for C<sub>11</sub>H<sub>20</sub>N [M-Cl]<sup>+</sup>: 166.15903, found 166.15903; **LRMS** (+ESI): 166 ([M-Cl]<sup>+</sup>, 100).

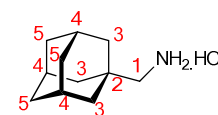

**N-(Adamantan-1-ylmethyl)-2-chloro-5-methoxybenzamide (1).** Oxalyl chloride (500 μL, 5.91 mmol) was added to 2-chloro-5-methoxybenzoic acid **9** (500 mg, 2.68 mmol) in THF (10 mL). A drop of DMF was added to the solution which resulted in effervescence and the reaction mixture was left stirring at room temperature under a N<sub>2</sub> atmosphere. After 1 h, the solvent was removed by a stream of N<sub>2</sub> gas and the acid chloride dried under a high vacuum (0.5 h). The acid chloride was dissolved in THF (10 mL) and added to adamantan-1-ylmethylamine hydrochloride **S5** (540 mg, 2.68 mmol) with THF washings (5 mL). Et<sub>3</sub>N (800 μL, 5.74 mmol) was added to the reaction mixture which was then left stirring at room temperature under a N<sub>2</sub> atmosphere overnight (18 h). The solvent was removed by rotary evaporation and the residue partitioned between EtOAc (100 mL) and aq. NaOH (1 M, 50 mL). The organic layer was collected and washed with HCl<sub>(aq)</sub> (1 M, 50 mL) before being dried over anhyd. MgSO<sub>4</sub> and evaporated to dryness. The resulting off-white solid was subjected to flash chromatography (1:3, EtOAc: hexane) to yield pure N-(adamantan-1-ylmethyl)-2-chloro-5-methoxybenzamide **1** (640 mg, 72 %) as a colorless solid. **M.P.** 115-118 °C; **IR** (thin film): 3447, 3288 (N-H), 1645 (C=O), 1599, 1450, 1292, 808, 617 cm<sup>-1</sup>; **<sup>1</sup>H NMR** (500 MHz, CDCl<sub>3</sub>): δ 7.34-7.22 (2H, m, H3, H6), 6.88 (1H, dd, <sup>3</sup>*J* = 9.0 Hz, <sup>4</sup>*J* = 3.0 Hz, H4), 6.35 (1H, br s, NH), 3.81 (3H, s, H7), 3.16 (2H, d, *J* = 6.0 Hz, H9), 1.99 (3H, br s, H12), 1.68 (6H, m, H13), 1.58 (6H, d, *J* = 2.0 Hz, H11) ppm; **<sup>13</sup>C NMR** (126 MHz, CDCl<sub>3</sub>): δ 166.4 (C8), 158.6 (C5), 135.9 (C1), 131.2 (C3), 121.7 (C2), 118.0 (C4), 115.3 (C6), 55.8 (C7), 51.9 (C9), 40.4 (C11), 37.1 (C13), 34.0 (C10), 38.4 (C12) ppm;

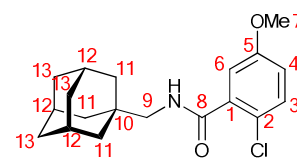

**HRMS** (+ESI) Calc. for  $C_{19}H_{24}O_2N^{35}Cl$   $[M+H]^+$ : 334.1571, found: 334.1562; **LRMS** (+ESI): 691/689 ( $[2M+Na]^+$ , 66/100), 334.1 ( $[M+H]^+$ , 26); **Anal.** ( $C_{19}H_{24}ClNO_2$ ): calc, C 68.35, H 7.25, N 4.20; found, C 68.47, H 7.24, N 4.26.

### Synthesis of cubanyl benzamide (2)

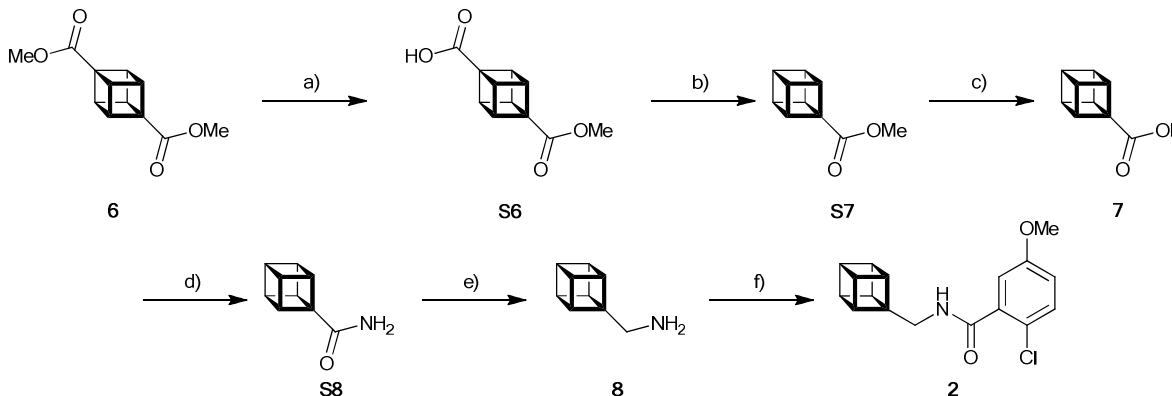

**Scheme 3.** a) NaOH (1 equiv.), MeOH, THF, rt, 16 h, then  $HCl_{(aq)}$ , 88%; b)  $(COCl)_2$ ,  $CH_2Cl_2$ , rt, 1 h, then 2-mercaptopyridine *N*-oxide sodium salt, *hν*, DMAP,  $CHCl_3$ , reflux, 1 h, 78%; c) NaOH, MeOH, reflux, 1 h, 97%; d) CDI, THF, rt, 2 h, then  $NH_4OH_{(aq)}$ , 4 °C to rt, 5 h, 85%; e)  $LiAlH_4$ , THF, 0 °C to reflux, 16 h, 51%; f) 2-chloro-5-methoxybenzoic acid **9**,  $(COCl)_2$ ,  $CH_2Cl_2$ , rt, 1 h, then amine **8**,  $CH_2Cl_2$ , rt, 16 h, 66%

**4-Methoxycarbonylcubane carboxylic acid (S6).**<sup>5</sup> A solution of methanolic NaOH (2.5 M, 8.5 mL, 21 mmol) was added dropwise to a solution of dimethyl 1,4-cubanedicarboxylate **6** (4.5 g, 20 mmol) in THF (140 mL) at ambient temperature. The mixture was stirred for 16 h and then concentrated under reduced pressure with minimal heating. The solid residue was diluted with  $H_2O$  (50 mL) and washed with  $CHCl_3$  ( $3 \times 25$  mL). The aqueous layer was acidified to pH 3 by the dropwise addition of conc. HCl (2.5 mL) and then extracted with  $CHCl_3$  ( $1 \times 80$  mL;  $2 \times 40$  mL). The combined organic extracts were dried over anhyd.  $Na_2SO_4$  and evaporated *in vacuo* to yield the half ester **S6** (3.7 g, 88%) as a colorless solid. **M.P.** 184–186 °C (lit. M.P. 182–183 °C)<sup>5</sup>; **<sup>1</sup>H NMR** (200 MHz,  $CDCl_3$ ):  $\delta$  4.27 (6H, m, H4, H5), 3.72 (3H, s, H1) ppm. The spectroscopic data matched that reported in the literature.<sup>5</sup>

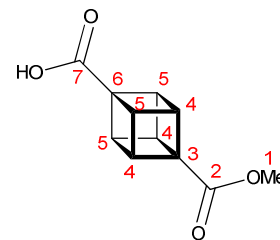

**Methyl cubanecarboxylate (S7).**<sup>6</sup> Oxalyl chloride (4.6 mL, 58.65 mmol) was added to the half ester **S6** (5.70 g, 27.6 mmol) in  $CH_2Cl_2$  (140 mL). A drop of DMF was added to which resulted in effervescence and the reaction left stirring at room temperature under a  $N_2$  atmosphere. After 1 h, the solvent was removed by a stream of  $N_2$  gas and the acid chloride dried under a high vacuum for at least 1 h. The acid chloride was dissolved in  $CHCl_3$  (140 mL) added to a solution of mercaptopyridine *N*-oxide sodium salt (5.07 g, 34.0 mmol) and *N,N*-dimethylpyridine (340 mg, 2.78 mmol) in  $CHCl_3$  (140 mL). The combined solution was refluxed by irradiation from a 500 W tungsten filament lamp, placed *ca.* 2 cm from the reaction vessel. After 1 h, the solvent was removed by rotary evaporation and the resulting residue dissolved in  $Et_2O$  (500 mL) and washed with HCl (1 M,  $2 \times 500$  mL), aq.  $Na_2CO_3$  (sat., 500 mL) and then brine (500 mL). The organic layer was dried over anhyd.  $MgSO_4$  and evaporated to dryness by rotary evaporation. The crude ester was subjected to flash chromatography (1:9,  $Et_2O$ :hexanes) to yield pure mono ester **S7** (3.48 g, 78%) as a sweet-smelling, low melting point, colorless solid. **M.P.** 51–52 °C (lit. M.P. 51.2–52.9 °C)<sup>6</sup>; **<sup>1</sup>H NMR** (400 MHz,  $CDCl_3$ ):  $\delta$  4.28–4.21 (3 H, m, H4), 4.04–3.95 (4H, m, H5, H6), 3.69 (3 H, s, H1) ppm; **<sup>13</sup>C NMR** (100 MHz,  $CDCl_3$ ):  $\delta$  173.0 (C2), 55.8 (C3), 51.5 (C1), 49.6 (C4), 48.0 (C6), 45.3 (C5) ppm. The spectroscopic data matched that reported in the literature.<sup>6</sup>

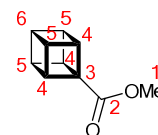

**Cubanecarboxylic acid (7).**<sup>6</sup> The monoester **S7** (2.95 g, 18.2 mmol) was refluxed in methanolic NaOH (1.25 M, 40 mL) for 2 h and then the solvent was removed by rotary evaporation. The residue was dissolved in  $H_2O$  (50 mL) and washed with  $Et_2O$  (50 mL). The aqueous layer was acidified to pH 1 with conc. HCl resulting in a white precipitate that was extracted into  $CH_2Cl_2$  (100 mL). The aqueous layer was extracted once more with  $CH_2Cl_2$  (100 mL) and the two organic layers were combined, dried over anhyd.  $MgSO_4$  and evaporated to dryness by rotary evaporation. The crude acid was subjected to flash chromatography (1:9,  $Et_2O$ :hexanes) to yield pure cubanecarboxylic acid **7** (2.62 g, 97%) as a light yellow solid. **M.P.** 126–128 °C (lit. M.P. 124–125 °C)<sup>5</sup>; **<sup>1</sup>H NMR** (500 MHz,  $CDCl_3$ ):  $\delta$  4.18–4.4.11 (3 H, m,

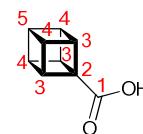

H3), 4.00-3.93 (4H, m, H4, H5) ppm;  $^{13}\text{C}$  NMR (125 MHz,  $\text{CDCl}_3$ ):  $\delta$  172.8 (C1), 55.3 (C2), 48.5 (C3), 47.0 (C5), 44.1 (C4) ppm. The spectroscopic data matched that reported in the literature.<sup>5</sup>

**Cubanecarboxamide (S8).** Cubanecarboxylic acid **7** (2.60 g, 17.6 mmol) and 1,1'-carbonyldiimidazole (3.41 g, 21.0 mmol) were stirred for 2 h at room temperature in THF (65 mL) under a  $\text{N}_2$  atmosphere. The reaction was cooled on ice then aq.  $\text{NH}_3$  (28%, 9 mL) was added. The reaction was stirred for 5 h, allowing the solution to warm to room temperature. The solvent was removed by rotary evaporation and the residue dissolved in hot  $\text{CHCl}_3$  (300 mL) and washed with aq.  $\text{Na}_2\text{CO}_3$  (sat., 100 mL) and then HCl (1 M, 100 mL). The organic layer was dried over anhyd.  $\text{MgSO}_4$  and evaporated to dryness to yield cubanecarboxamide **S8** (2.206 g, 85%). **M.P.** 209-211 °C (lit. M.P. 209-212 °C)<sup>7</sup>;  $^1\text{H}$  NMR (500 MHz,  $d_6$ -DMSO):  $\delta$  7.15 (1H, br s,  $\text{NH}_a$ ), 6.87 (1H, br s,  $\text{NH}_b$ ), 4.12 (3H, m, H3), 3.96 (1H, m, H5), 3.92 (3H, m, H4) ppm;  $^{13}\text{C}$  NMR (125 MHz,  $d_6$ -DMSO):  $\delta$  172.3 (C1), 55.8 (C2), 48.5 (C3), 46.8 (C5), 43.8 (C4) ppm.

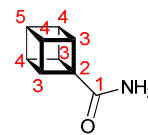

**Cubane-1-methylamine (8).** Powdered  $\text{LiAlH}_4$  (0.45 g, 12 mmol) was added to a solution of cubanecarboxamide **S8** (0.37g, 2.5 mmol) in THF (60 mL) at 0 °C with stirring. After warming to ambient temperature, the suspension was heated at reflux for 16 h before cooling to 0 °C. Aq. NaOH (15% w/v, 2 mL) was added dropwise with vigorous stirring to quench the excess  $\text{LiAlH}_4$  after which the mixture was stirred at ambient temperature for 1 h. The granular precipitate was filtered off and washed with  $\text{CH}_2\text{Cl}_2$  (70 mL). The combined organic portions were dried over anhyd.  $\text{Na}_2\text{SO}_4$  and evaporated under reduced pressure. The crude product was purified by flash chromatography (90:10:0.5,  $\text{CH}_2\text{Cl}_2/\text{MeOH}/\text{NH}_3(\text{aq})$ ) to yield the amine **8** (287 mg, 70%) as a light brown oil. **R<sub>f</sub>** 0.14 (90:10:0.5,  $\text{CH}_2\text{Cl}_2/\text{MeOH}/\text{NH}_3(\text{aq})$ );  $^1\text{H}$  NMR (300 MHz,  $\text{CDCl}_3$ ):  $\delta$  4.03 (1H, m, H5), 3.92-3.75 (6H, m, H3, H4), 2.82 (2H, s, H1) ppm;  $^{13}\text{C}$  NMR (75 MHz,  $\text{CDCl}_3$ ):  $\delta$  59.7, 48.9, 47.0 (3C), 44.5, 44.3 (3C) ppm. The spectroscopic data matched that reported in the literature.<sup>7</sup>

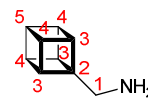

**2-Chloro-N-(cuban-1-ylmethyl)-5-methoxybenzamide (2).** Oxalyl chloride (740  $\mu\text{L}$ , 8.63 mmol) was added to 2-chloro-5-methoxybenzoic acid **9** (800 mg, 4.29 mmol) in THF (13 mL). A drop of DMF was added to which resulted in effervescence and the reaction left stirring at room temperature under a  $\text{N}_2$  atmosphere. After 1 h, the solvent was removed by a stream of  $\text{N}_2$  gas and the acid chloride dried under a high vacuum. In a separate flask,  $\text{Et}_3\text{N}$  (600  $\mu\text{L}$ , 4.29 mmol) was added to freshly prepared cubane-1-methylamine **8** (293 mg, 2.20 mmol) dissolved in THF (10 mL). The amine solution was added to the neat acid chloride with THF washes (2 x 1.5 mL) resulting in a white precipitate. The reaction was left stirring at room temperature under a  $\text{N}_2$  atmosphere overnight (18 h). The solvent was removed by rotary evaporation and the residue partitioned between EtOAc (150 mL) and aq. NaOH (1 M, 50 mL). The organic layer was collected and washed again with NaOH (1 M, 50 mL) and then aq. HCl (1 M, 50 mL). The organic layer was collected, dried over anhyd.  $\text{MgSO}_4$  and evaporated to dryness. The resulting off-white solid was subjected to flash chromatography (1:3, EtOAc: hexane) to yield **2** (435 mg, 66 %) as an off-white solid. The benzamide **2** was crystallized from EtOAc and hexane. **M.P.** 160-161 °C, **R<sub>f</sub>** 0.24 (1:3, EtOAc: hexane); **IR** (thin film): 3313 (N-H), 3192, 3074, 3065, 2986, 2966, 2924, 2851, 2835, 2733, 2696, 2258, 2231, 2193, 2131, 1638 (C=O), 1605, 1545, 1298, 1136, 1024, 818, 519, 509  $\text{cm}^{-1}$ ;  $^1\text{H}$  NMR (400 MHz,  $d_6$ -DMSO):  $\delta$  8.45 (1H, br t,  $J = 5.8$  Hz, NH), 7.38 (1H, d,  $J = 8.8$  Hz, H3), 7.00 (1H, dd,  $^3J = 8.8$  Hz,  $^4J = 2.8$  Hz, H4), 6.91 (1H, d,  $^4J = 2.8$  Hz, H6), 4.00 (1H, m, H13), 3.92-3.83 (6H, m, H11, H12), 3.77 (3H, s, H7), 3.45 (2H, d,  $J = 6.0$  Hz, H9) ppm;  $^{13}\text{C}$  NMR (101 MHz,  $d_6$ -DMSO):  $\delta$  166.2 (C8), 157.8 (C5), 138.1 (C1), 130.4 (C3), 120.8 (C2), 116.1 (C4), 114.0 (C6), 57.1 (C10), 55.6 (C7), 47.5 (C13), 47.1 (C11), 43.3 (C12), 40.8 (C9) ppm; **HRMS** (+ESI) Calc. for  $\text{C}_{17}\text{H}_{16}\text{O}_2\text{N}^{35}\text{Cl}$   $[\text{M} + \text{Na}]^+$ : 324.0764, found: 324.0756; **LRMS** (+ESI): 627/625 ( $[\text{2M} + \text{Na}]^+$ , 84/100), 324 ( $[\text{M} + \text{Na}]^+$ , 95), 302 ( $[\text{M} + \text{H}]^+$ , 30); **Anal.** ( $\text{C}_{17}\text{H}_{16}\text{ClNO}_2$ ): calc. C 67.66, H 5.34, N 4.64; found C 67.89, H 5.48, N 4.49.

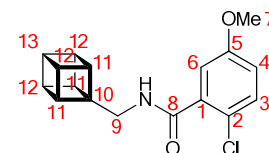

### Synthesis of trishomocubanyl benzamide (3)

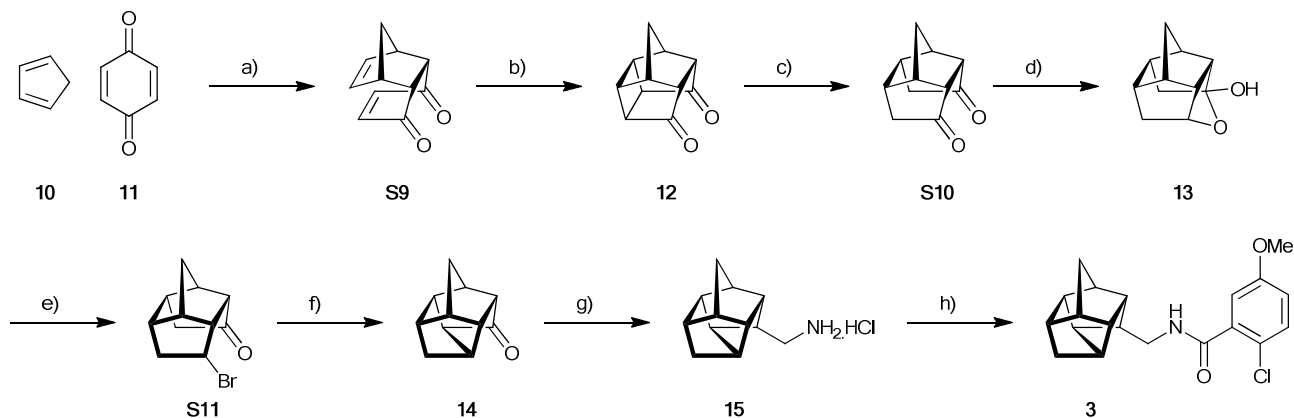

**Scheme 4.** a) PhMe, -10 °C to rt, 3 h, 78%; b) *hν*, Me<sub>2</sub>CO/hexanes, 8 h, 92%; c) Zn, AcOH, rt, 5 h, 90%; d) NaBH<sub>4</sub>, EtOH/H<sub>2</sub>O, rt, 3 h, quant.; e) 33% HBr in CH<sub>3</sub>CO<sub>2</sub>H, sealed tube, 100 °C, 16 h; f) *t*-BuOK, Et<sub>2</sub>O, rt, 16 h, 70% over 2 steps; g) TosMIC, *t*-BuOK, (MeOCH<sub>2</sub>)<sub>2</sub>, EtOH, 5-35 °C, then LiAlH<sub>4</sub>, Et<sub>2</sub>O, reflux, 16 h, then anhyd. HCl, Et<sub>2</sub>O (70% over 3 steps); h) 2-chloro-5-methoxybenzoic acid **9**, EDC.HCl, HOBT, NMM, CH<sub>2</sub>Cl<sub>2</sub>, 0 °C to rt, 16 h, 80%.

**Endo-cis-1,4,4a,8a-tetrahydro-1,4-methanonaphthalene-5,8-dione (S9).**<sup>8</sup> A solution of cold, freshly cracked cyclopentadiene **10** (17.2 mL, 210 mmol) in PhMe (20 mL) was added dropwise over 30 min to a mixture of recrystallized 1,4-benzoquinone **11** (24 g, 220 mmol) in PhMe (200 mL) at -10 °C. The reaction mixture was stirred at ambient temperature for 3 h and then evaporated *in vacuo*. The crude residue was recrystallized from MeOH to give the desired adduct **S9** (28.5 g, 78%) as yellow crystals. <sup>1</sup>H NMR (200 MHz, CDCl<sub>3</sub>): δ 6.56 (2H, s, H1), 6.07 (2H, br s, H5), 3.55 (2H, br s, H4), 3.22 (2H, br s, H3), 1.54 (1H, dt, *J* = 8.8, 1.6 Hz, H), 1.42 (1H, br d, *J* = 8.8 Hz, H6<sub>b</sub>) ppm. The spectroscopic data matched that reported in the literature.<sup>8</sup>

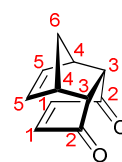

**Pentacyclo[5.4.0.0<sup>2,6</sup>.0<sup>3,10</sup>.0<sup>5,9</sup>]undecane-8,11-dione (Cookson diketone, 12).**<sup>8</sup> The *endo* adduct **S9** (13.0 g, 74 mmol) was dissolved in degassed (CH<sub>3</sub>)<sub>2</sub>CO/hexane (1:9 v/v, 250 mL) under an Ar atmosphere and irradiated with a 350 W Hanovia mercury lamp (*ca.* 10 cm distance) for 8 h. After completion of photocyclization, the solvent was evaporated *in vacuo* to give crude Cookson diketone **12** (12.0 g, 92%) as a colorless solid. Recrystallisation from EtOAc/hexane (20:80) gave analytically pure **12** as colorless crystals. <sup>1</sup>H NMR (300 MHz, CDCl<sub>3</sub>): δ 3.14 (2H, br s), 2.91 (2H, br s), 2.78 (2H, br s), 2.67 (2H, br s), 2.02 (1H, d, *J* = 11.3 Hz, H6<sub>a</sub>), 1.85 (1H, d, *J* = 11.3 Hz, H6<sub>b</sub>) ppm. The spectroscopic data matched that reported by the Aldrich Library and in the literature.<sup>8</sup>

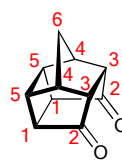

**Tetracyclo[6.3.0.0<sup>4,11</sup>.0<sup>5,9</sup>]undecane-2,7-dione (S10).**<sup>9</sup> A mixture of Cookson diketone **12** (10 g, 57 mmol) and zinc dust (40 g, 612 mmol) in glacial AcOH (400 mL) was stirred at ambient temperature for 5 h. The reaction was then poured into ice H<sub>2</sub>O (400 mL) and extracted with CH<sub>2</sub>Cl<sub>2</sub> (2 × 200 mL, 2 × 150 mL). The combined organic extracts were washed with dilute NaOH (1.2 M, 4 × 200 mL), H<sub>2</sub>O (200 mL), dried over anhyd. Na<sub>2</sub>SO<sub>4</sub> and evaporated *in vacuo* to give the diketone **S10** (9.0 g, 90%) as a colorless solid. This was used in the next step without further purification. <sup>1</sup>H NMR (300 MHz, CDCl<sub>3</sub>): δ 2.80 (2H, br s, H3), 2.75–2.65 (4H, m, H1), 2.29–2.20 (4H, m, H4, H5), 1.98 (1H, d, *J* = 7.4 Hz, H6<sub>a</sub>), 1.85 (1H, d, *J* = 7.4 Hz, H6<sub>b</sub>) ppm. The spectroscopic data matched that reported in the literature.<sup>9</sup>

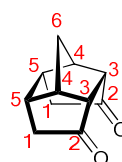

**Octahydro-2,3,5-ethanylylidene-2H-pentaleno[1,6-*bc*]furan-2-ol (13).**<sup>10</sup> To a solution of the diketone **S10** (9.0 g, 51 mmol) in aq. EtOH (1:1 v/v, 600 mL) was added NaBH<sub>4</sub> (3.2 g, 85 mmol) at ambient temperature in one portion, and the resulting mixture was stirred for 3 h. The reaction mixture was concentrated *in vacuo* and H<sub>2</sub>O (300 mL) was added to the residue, followed by extraction with CH<sub>2</sub>Cl<sub>2</sub> (1 × 150 mL, 2 × 100 mL, 1 × 50 mL). The combined organic extracts were washed with H<sub>2</sub>O (2 × 100 mL), dried over anhyd. Na<sub>2</sub>SO<sub>4</sub> and evaporated by rotary evaporation to give lactol **13** (9.1 g, >98%) as a colorless solid. This was used in the next step without further purification. <sup>1</sup>H NMR (300 MHz, CDCl<sub>3</sub>): δ 4.63 (1H, t, *J* = 6.6 Hz), 4.26 (1H, m), 2.90–2.83 (1H, m), 2.47 (1H, br s), 2.39–2.33 (1H, m), 2.20 (3H, br s), 2.07 (1H, d, *J* = 13.2 Hz), 1.95 (1H, m), 1.85 (1H, d, *J* = 14.1 Hz), 1.79 (1H, d, *J* = 10.8 Hz), 1.66 (2H, d, *J* = 10.8 Hz) ppm. The spectroscopic data matched that reported in the literature.<sup>10</sup>

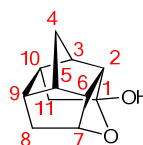

**8-Bromohexahydro-1,2,4-[1]propanyl[3]ylidenepentalen-5(1*H*)-one (S11).**<sup>10</sup> The lactol **13** (9.1 g, 51 mmol) was treated with a solution of HBr in AcOH (33%, 40 mL) and heated to 100 °C with stirring in a sealed tube overnight, and then stirred at ambient temperature for a further 16 h. The reaction was quenched by carefully pouring into a mixture of sat. NaHCO<sub>3(aq.)</sub> and CH<sub>2</sub>Cl<sub>2</sub> (3:1 v/v, 600 mL). The aqueous layer was removed and extracted with additional CH<sub>2</sub>Cl<sub>2</sub> washes (3 × 50 mL). The combined organic layers were washed sequentially with aq. NaHCO<sub>3</sub> (sat., 3 × 100 mL), H<sub>2</sub>O (2 × 100 mL), dried over anhyd. Na<sub>2</sub>SO<sub>4</sub> and then evaporated *in vacuo* to give the crude bromoketone **S11** (12 g, 95%) as a brown oil. This was used in the next step without further purification. <sup>1</sup>H NMR (300 MHz, CDCl<sub>3</sub>): δ 4.29 (1H, dd, *J* = 7.2, 3.6 Hz), 3.00 (1H, s), 2.78–2.71 (1H, m), 2.65 (1H, br s), 2.53–2.36 (4H, m), 2.34–2.25 (1H, m), 2.20–2.12 (2H, m), 1.79 (2H, dd, *J* = 26.0, 11.1 Hz) ppm. The spectroscopic data matched that reported in the literature.<sup>10</sup>

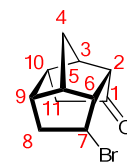

**(±)-(D<sub>3</sub>)-Trishomocubanone (Pentacyclo[6.3.0.0<sup>2,6</sup>.0<sup>3,10</sup>.0<sup>5,9</sup>]undecan-4-one, **14**).**<sup>11</sup> A suspension of the bromoketone **S11** and KO<sup>t</sup>Bu (8.5 g, 76 mmol) in Et<sub>2</sub>O (150 mL) was stirred at ambient temperature for 16 h. The reaction was acidified to pH 6 with 1 M HCl and then concentrated *in vacuo*. Water (150 mL) was added, followed by extraction with CH<sub>2</sub>Cl<sub>2</sub> (4 × 80 mL). The combined organic extracts were washed with H<sub>2</sub>O (2 × 100 mL), dried over anhyd. Na<sub>2</sub>SO<sub>4</sub> and evaporated by rotary evaporation. The crude product was purified by flash chromatography (9:1, hexane:Et<sub>2</sub>O) to yield the desired ketone **14** (5.9 g, 70% over 2 steps) as a colorless solid. <sup>1</sup>H NMR (300 MHz, CDCl<sub>3</sub>): δ 2.45 (2H, br s), 2.40–2.35 (4H, m), 1.80–1.76 (2H, m), 1.69 (2H, dd, *J* = 10.4, 1.5 Hz), 1.42 (2H, d, *J* = 10.2 Hz) ppm. The spectroscopic data matched that reported in the literature.<sup>11</sup>

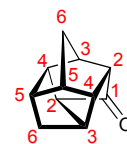

**D<sub>3</sub>-Trishomocubylmethylamine hydrochloride (**15**).** A solution of D<sub>3</sub>-trishomocubanone **14** (4.0 g, 25 mmol), *p*-tosylmethylisocyanide (7.2 g, 37 mmol) and EtOH (3 mL) in freshly distilled 1,2-dimethoxyethane (100 mL) was cooled to 5 °C and solid KO<sup>t</sup>Bu (7.6 g, 68 mmol) was added in several portions over 10 min, maintaining the temperature between 5 and 10 °C. The mixture was then stirred at ambient temperature for 45 min and for a further 30 min at 35–40 °C. After cooling, the precipitate was filtered off and washed with 1,2-dimethoxyethane (100 mL). The combined organic layers were concentrated *in vacuo* to ca. 3 mL and chromatographed through a short column of neutral alumina (hexane) to give 4-cyano-D<sub>3</sub>-trishomocubane as a colorless oil which was used in the next step without further purification. A solution of the 4-cyano-D<sub>3</sub>-trishomocubane in Et<sub>2</sub>O (200 mL) was treated with LiAlH<sub>4</sub> (1.5 g, 39 mmol) at 0 °C and subsequently heated at reflux for 16 h. After cooling to 0 °C, aq. NaOH (15% w/v 20 mL) was added dropwise with vigorous stirring. After 1 h of stirring at 0 °C, the mixture was filtered and the precipitate was washed with CH<sub>2</sub>Cl<sub>2</sub> (500 mL). The combined organic layers were dried over anhyd. Na<sub>2</sub>SO<sub>4</sub> and re-dissolved in Et<sub>2</sub>O (80 mL). A solution of HCl in Et<sub>2</sub>O (2M, 15 mL) was added dropwise at 0 °C and the mixture was stirred for 2 h at ambient temperature. Evaporation of the solvent furnished the desired amine salt **15** (3.7 g, 70% over 2 steps) as a colorless solid. <sup>1</sup>H NMR (300 MHz, D<sub>2</sub>O): δ 3.02 (2H, d, *J* = 7.7 Hz, H1), 2.35 (1H, br s, H2), 2.24–1.90 (7H, m), 1.48–1.24 (5H, m) ppm.

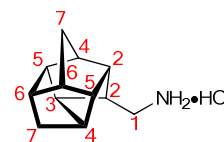

**N-(D<sub>3</sub>-trishomocuban-4-ylmethyl)-2-chloro-5-methoxybenzamide (**3**).** A mixture of the 2-chloro-5-methoxybenzoic acid **9** (522 mg, 2.80 mmol), D<sub>3</sub>-trishomocubylmethylamine hydrochloride **15** (593 mg, 2.80 mmol), *N*-(3-dimethylaminopropyl)-*N'*-ethylcarbodiimide hydrochloride (700 mg, 3.65 mmol), and 1-hydroxybenzotriazole hydrate (14% H<sub>2</sub>O content, 572 mg, 3.64 mmol) in CH<sub>2</sub>Cl<sub>2</sub> (10 mL) was treated with *N*-methylmorpholine (925 μL, 8.41 mmol) dropwise at 0 °C. After stirring for 16 h at ambient temperature, aq. NaHCO<sub>3</sub> (sat., 30 mL) and CH<sub>2</sub>Cl<sub>2</sub> (20 mL) were added. The organic layer was separated and the aqueous layer was further extracted with CH<sub>2</sub>Cl<sub>2</sub> (2 × 30 mL). The combined organic layers were washed sequentially with aq. NaHCO<sub>3</sub> (sat., 40 mL) and brine (40 mL), dried over anhyd. Na<sub>2</sub>SO<sub>4</sub>, and then concentrated *in vacuo*. Subjecting the crude amide **3** to flash column chromatography (4:1, hexane:EtOAc) resulted in pure benzamide **3** (770 mg, 80%) as a colorless solid. **M.P.** 117–123 °C; **R<sub>f</sub>** 0.38 (7:3, hexane/EtOAc); **IR** (KBr) 3277, 2955, 2867, 1645 (C=O), 1537, 1318, 1240, 1033, 857 cm<sup>-1</sup>; <sup>1</sup>H NMR (600 MHz, CDCl<sub>3</sub>): δ 7.27 (1H, d, *J* = 8.4 Hz, H3), 7.24 (1H, d, <sup>4</sup>*J* = 3.0, H3, H6), 6.88 (1H, dd, <sup>3</sup>*J* = 9.0, <sup>4</sup>*J* = 3.0 Hz, H4), 6.32 (1H, br s, NH), 3.81 (3H, s, H7), 3.42 (2H, m, H9), 2.40 (1H, br s, H10), 2.20–1.96 (8H, m), 1.43 (2H, d, *J* = 10.2 Hz), 1.33 (2H, m) ppm; <sup>13</sup>C NMR (75 MHz, CDCl<sub>3</sub>): δ 166.1 (C8), 158.6 (C5), 135.9 (C1), 131.2 (C3), 121.8 (C2), 117.9 (C4), 115.1 (C6), 55.8 (C7), 49.8, 47.6, 45.9, 42.8, 40.6, 33.4, 33.1 ppm; **HRMS** (+ESI): Calc. for C<sub>20</sub>H<sub>23</sub><sup>37</sup>ClNO<sub>2</sub> [M + H]<sup>+</sup>: 346.13823, found: 346.13844, Calc. for C<sub>20</sub>H<sub>23</sub><sup>35</sup>ClNO<sub>2</sub> [M + H]<sup>+</sup>: 344.14118, found: 344.14125; **LRMS** (+ESI): 344 ([M+H]<sup>+</sup>, 100); **Anal.** (C<sub>20</sub>H<sub>22</sub>ClNO<sub>2</sub>): calc, C 69.86, H 6.45, N 4.07; found, C 70.12, H 6.64, N 4.10.

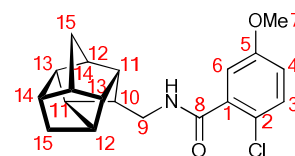



## Synthesis of *closo*-*o*-carboranyl benzamide 4 and *nido*-*o*-carboranyl benzamide (5)

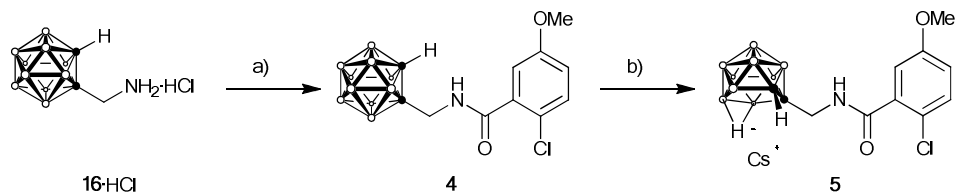

**Scheme 5.** a) 2-chloro-5-methoxybenzoic acid **9**, (COCl)<sub>2</sub>, CH<sub>2</sub>Cl<sub>2</sub>, rt, 1 h, then amine **16**, THF, Et<sub>3</sub>N, rt, 16 h, 72%; b) CsF (3 equiv.), EtOH, reflux, 24 h, 95%.

***Closo*-1,2-carboranylmethylamine hydrochloride (16•HCl).** The carboranylmethylamine hydrochloride **16•HCl** was prepared according to that reported by Wilson and Soloway.<sup>12</sup> The spectroscopic data matched that reported in the literature.<sup>12</sup>

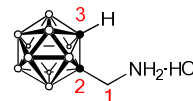

***N*-(*closo*-1,2-carboranylmethyl)-2-chloro-5-methoxybenzamide (4).** Oxalyl chloride (100 μL, 1.15 mmol) was added to 2-chloro-5-methoxybenzoic acid **9** (100 mg, 0.536 mmol) suspended in CH<sub>2</sub>Cl<sub>2</sub> (2 mL) under N<sub>2</sub> atmosphere. A drop of DMF was added (resulting in effervescence) and the solution stirred at room temperature for an hour. The solvent and excess oxalyl chloride were removed under high vacuum and the resulting oil was dissolved in CH<sub>2</sub>Cl<sub>2</sub> (1 mL). In a separate flask, Et<sub>3</sub>N (320 μL) was added to *N*-(*closo*-1,2-carboranyl)methylamine hydrochloride **16•HCl** (100 mg, 0.477 mmol) suspended in CH<sub>2</sub>Cl<sub>2</sub> (1 mL) at room temperature under a N<sub>2</sub> atmosphere. The acid chloride solution was added by means of a cannula to this solution with CH<sub>2</sub>Cl<sub>2</sub> washing (0.5 mL). The reaction mixture was left to stir at ambient temperature for 16 h under N<sub>2</sub> atmosphere. The reaction was diluted with CHCl<sub>3</sub> (25 mL) and washed with HCl (1 M, 2 x 10 mL), NaOH (1 M, 2 x 10 mL), and then H<sub>2</sub>O (10 mL). The organic layer was dried over anhyd. MgSO<sub>4</sub> then evaporated to dryness. The resulting brown oil (137 mg) was subjected to flash chromatography (4:1, hexane : EtOAc) to afford *N*-(*closo*-1,2-carboranyl)methyl)-2-chloro-5-methoxybenzamide **4** (105 mg, 64%) as an off-white solid. Recrystallization from <sup>1</sup>PrOH/ H<sub>2</sub>O yielded white needles. **M.P.** 160-162 °C; **IR** (ZnSe cell): 3320 (N-H), 3040 (C-H), 2584 (B-H), 2554 (B-H), 1645 (C=O), 1533, 1234, 1019, 813, 642, 598 cm<sup>-1</sup>; **<sup>1</sup>H{<sup>11</sup>B} NMR** (400 MHz, *d*<sub>6</sub>-DMSO): δ 9.18 (1H, t, *J* 6.4, NH), 7.43 (1H, d, *J* = 8.8, H3), 7.07 (1H, dd, *J* = 8.8, <sup>4</sup>*J* = 2.8, H4), 6.97 (1H, d, <sup>4</sup>*J* = 2.8, H6), 5.09 (1H, s, H11), 4.02 (2H, d, *J* = 6.8, H9), 3.79 (3H, s, H7), 2.50-1.70 (10H, m, BH); **<sup>13</sup>C NMR** (100 MHz, *d*<sub>6</sub>-DMSO): δ 166.2 (C8), 157.8 (C5), 136.2 (C1), 130.9 (C3), 121.1 (C2), 116.7 (C4), 114.5 (C6), 75.9 (C11), 62.1 (C9), 55.7 (C7), 43.5 (C10); **<sup>11</sup>B NMR** (128 MHz, *d*<sub>6</sub>-DMSO): δ -2.90, -5.67, -9.72, -11.67, -12.57; **LRMS** (+ESI) *m/z*: 364 ([M+Na]<sup>+</sup>, 100%), 470 (36%), 540 (54%); **HRMS** (+ESI) *m/z*: 361.2187 (8%, C<sub>11</sub>H<sub>20</sub><sup>10</sup>B<sub>5</sub><sup>11</sup>B<sub>5</sub><sup>35</sup>CINNaO<sub>2</sub> [M+Na]<sup>+</sup> gives 361.2192), 362.2151 (29%, C<sub>11</sub>H<sub>20</sub><sup>10</sup>B<sub>4</sub><sup>11</sup>B<sub>6</sub><sup>35</sup>CINNaO<sub>2</sub> [M+Na]<sup>+</sup> gives 362.2156), 363.2114 (66%, C<sub>11</sub>H<sub>20</sub><sup>10</sup>B<sub>3</sub><sup>11</sup>B<sub>7</sub><sup>35</sup>CINNaO<sub>2</sub> [M+Na]<sup>+</sup> gives 363.2120), 364.2078 (100%, C<sub>11</sub>H<sub>20</sub><sup>10</sup>B<sub>2</sub><sup>11</sup>B<sub>8</sub><sup>35</sup>CINNaO<sub>2</sub> [M+Na]<sup>+</sup> gives 364.2083), 365.2042 (90%, C<sub>11</sub>H<sub>20</sub><sup>10</sup>B<sub>1</sub><sup>11</sup>B<sub>9</sub><sup>35</sup>CINNaO<sub>2</sub> [M+Na]<sup>+</sup> gives 365.2047), 366.2049 (38%, C<sub>11</sub>H<sub>20</sub><sup>10</sup>B<sub>2</sub><sup>11</sup>B<sub>8</sub><sup>37</sup>CINNaO<sub>2</sub> [M+Na]<sup>+</sup> gives 366.2054), 367.2012 (30%, C<sub>11</sub>H<sub>20</sub><sup>10</sup>B<sub>1</sub><sup>11</sup>B<sub>9</sub><sup>37</sup>CINNaO<sub>2</sub> [M+Na]<sup>+</sup> gives 367.2018), 368.1976 (11%, C<sub>11</sub>H<sub>20</sub><sup>11</sup>B<sub>10</sub><sup>37</sup>CINNaO<sub>2</sub> [M+Na]<sup>+</sup> gives 368.1981); **Anal.** (C<sub>11</sub>H<sub>20</sub>B<sub>10</sub>ClNO<sub>2</sub>): calc, C 38.65, H 5.90, N 4.10; found, C 70.12, H 6.64, N 4.10.

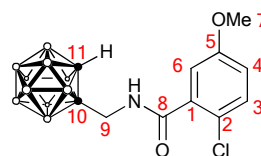

**Cesium *N*-(*nido*-7,8-carboranylmethyl)-2-chloro-5-methoxybenzamide (5).** A solution of *N*-(*closo*-*o*-carboranylmethyl)-2-chloro-5-methoxybenzamide **4** (100 mg, 0.293 mmol) and CsF (133 mg, 0.878 mmol) in EtOH (20 mL) was refluxed under a N<sub>2</sub> atmosphere for 24 h. The solvent was removed by rotary evaporation and (CH<sub>3</sub>)<sub>2</sub>CO (20 mL) was added to the white residue. The borate salts were removed by filtration and the filtrate evaporated to dryness to yield cesium *N*-(*nido*-7,8-carboranylmethyl)-2-chloro-5-methoxybenzamide Cs•**5** (129 mg, 95%) as a colorless solid.

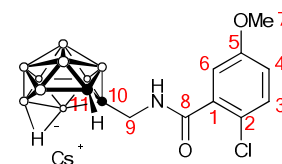

**M.P.** 194-196 °C; **IR** (ZnSe cell): 3417 (w, Ar-H), 2513 (s, B-H), 1704 (m), 1644 (s, C=O), 1526 (m), 1472 (m), 1232 (m), 1024 (s) cm<sup>-1</sup>; **<sup>1</sup>H NMR** (400 MHz, *d*<sub>6</sub>-DMSO): δ 8.37 (1H, t, *J* = 5.8, NH), 7.36 (1H, d, *J* 8.8, H3), 6.99 (1H, dd, <sup>3</sup>*J* = 8.6, <sup>4</sup>*J* = 3.0, H4), 6.91 (1H, d, <sup>4</sup>*J* = 2.8, H6), 3.78 (3H, s, H7), 3.31 (2H, m, H9), 1.92 (1H, br s, H11), 2.50-0.00 (9H, br, m, BH), -2.68 (1H, br d, <sup>1</sup>*J* 58, hydride); **<sup>13</sup>C NMR** (100 MHz, *d*<sub>6</sub>-DMSO): δ 165.3 (C8), 157.6 (C5), 137.9 (C1), 130.4 (C3), 121.2 (C2), 116.0 (C4), 114.3 (C6), 58.4 (br, carborane C), 55.6 (C7), 46.3 (C9), 45.1 (br, carborane C); **<sup>11</sup>B NMR** (128 MHz, *d*<sub>6</sub>-DMSO): δ -10.5, -14.7, -17.6, -22.6, -33.4, -37.4; **LRMS** (-ESI) *m/z*: 328 c 11%), 329 ([M-Cs]<sup>-</sup>, 27%), 330 ([M-Cs]<sup>-</sup>, 66%), 331 ([M-Cs]<sup>-</sup>, 92%), 332 ([M-Cs]<sup>-</sup>, 100%), 333 ([M-Cs]<sup>-</sup>, 62%), 334 ([M-Cs]<sup>-</sup>, 32%), 335 ([M-Cs]<sup>-</sup>, 15%); **HRMS** (-ESI) *m/z*:

327.2204 (5%,  $C_{11}H_{20}^{10}B_5^{11}B_4^{35}ClNO_2 [M-Cs]^-$  gives 327.2202), 328.2170 (20%,  $C_{11}H_{20}^{10}B_4^{11}B_5^{35}ClNO_2 [M-Cs]^-$  gives 328.2165), 329.2133 (59%,  $C_{11}H_{20}^{10}B_3^{11}B_6^{35}ClNO_2 [M-Cs]^-$  gives 329.2129), 330.2096 (100%,  $C_{11}H_{20}^{10}B_2^{11}B_7^{35}ClNO_2 [M-Cs]^-$  gives 330.2093), 331.2059 (90%,  $C_{11}H_{20}^{10}B_1^{11}B_7^{35}ClNO_2 [M-Cs]^-$  gives 331.2056), 332.2012 (38%,  $C_{11}H_{20}^{11}B_9^{35}ClNO_2 [M-Cs]^-$  gives 332.2020), 333.2031 (30%,  $C_{11}H_{20}^{10}B_1^{11}B_8^{37}ClNO_2 [M-Cs]^-$  gives 333.2027), 334.1996 (14%,  $C_{11}H_{20}^{11}B_9^{37}ClNO_2 [M-Cs]^-$  gives 334.1991).

## Lipophilicity measurements

### General Experimental

High Performance Liquid Chromatography was performed on a Waters 2695 Separations module equipped with the Waters Alliance Series Column Heater (set at 30 °C) and Waters 2996 Photodiode Array (PDA) Detector. Samples were resolved on a Waters Sunfire™ C18 5 µm column (2.1 x 150 mm) using an isocratic flow of 65 v/v% methanol in 50 mM sodium phosphate buffer (pH 7.4) at a flowrate of 0.3 mL/min. Standards and samples were dissolved in the elution solvent mixture and then filtered prior to injection. Data acquisition and processing was performed with the Waters Empower 2 software and Microsoft Excel™ was used for data analysis. All standards and samples were analyzed in triplicate.

### Standards calibration curve

The retention times (RET) of acetone ( $\log D_{7.4}$  -0.24), aniline ( $\log D_{7.4}$  0.90), phenol ( $\log D_{7.4}$  1.50), toluene ( $\log D_{7.4}$  2.730), cumene ( $\log D_{7.4}$  3.66), triphenylamine ( $\log D_{7.4}$  5.74), and hexachlorobenzene ( $\log D_{7.4}$  6.35) were plotted against their literature  $\log D_{7.4}$  values<sup>13</sup> to obtain a calibration curve. An exponential curve was obtained (**Figure 1**) which was fitted to the equation [ $\text{Log}D_{7.4} = 0.8401\ln(\text{RET})+1.8781$ ] with an  $R^2$  of 0.97.

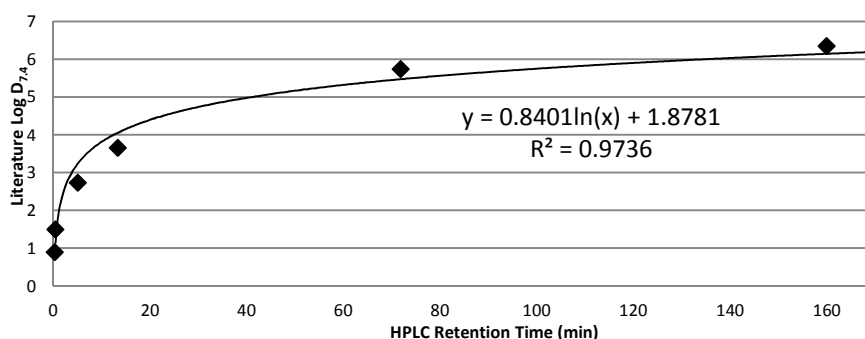

**Figure 1.** Calibration curve of standards with known  $\log D_{7.4}$  values against their HPLC retention times.

### Sample lipophilicity measurements

The RET from three injections was averaged (**Table 1**) with the  $\log D_{7.4}$  value extrapolated from the equation found in **Figure 1**.

**Table 1.** Average RET and  $\log D_{7.4}$  values for the benzamide 1-Cs-5 series

| Benzamide | Average RET (min) <sup>[a]</sup> | $\log D_{7.4}$ <sup>[b]</sup> |
|-----------|----------------------------------|-------------------------------|
| 1         | 17.856 ± 0.005                   | 4.30                          |
| 2         | 6.271 ± 0.004                    | 3.42                          |
| 3         | 18.035 ± 0.005                   | 4.31                          |
| 4         | 17.724 ± 0.023                   | 4.29                          |
| Cs-5      | 0.593 ± 0.005                    | 1.44                          |

<sup>[a]</sup> average retention time ± standard error based on the conditions outlined in the general experimental. <sup>[b]</sup>  $\log D_{7.4}$  calculated from the equation  $\text{Log}D_{7.4} = 0.8401\ln(\text{RET})+1.8781$

## Dye uptake assay

### General experimental

Human monocytic leukaemia cells (THP-1) were obtained from the American Type Culture Collection (ATCC). Roswell Park Memorial Institute (RPMI) 1640 medium was purchased from Invitrogen.

### Cell Culture

The human monocytic leukaemia cells (THP-1) were grown in RPMI 1640 medium (Invitrogen), supplemented with penicillin (100 U/mL), streptomycin (100  $\mu\text{g}/\text{mL}$ ) and 10% (v/v) heat-inactivated fetal bovine serum (FBS). Cells were cultured in 75  $\text{cm}^2$  flasks and incubated at 37 °C in a 5%  $\text{CO}_2$  humidified atmosphere, maintained in log phase of growth and passaged when cell density reached  $1 \times 10^6$  cells/mL (every 2-3 days).<sup>14</sup>

### Yo-Pro Uptake Assay for Pore Formation

P2X<sub>7</sub> receptor pore formation was assessed by agonist-induced uptake of the Yo-Pro dye. Cells were plated in 96-well black walled, clear bottom plates in the presence of lipopolysaccharide (LPS, 25 ng/mL) and interferon-gamma (IFN $\gamma$ , 10 ng/ml). Following an overnight incubation (16 h) required for THP-1 differentiation, cells were pre-incubated with various compound concentrations (diluted in DMSO) or control in culture medium (DMSO final concentration of 0.1%) for 30 min. Final treatments (in triplicate) were made up in phosphate buffered saline (PBS), without divalent cations, containing PRO<sup>®</sup>-1 dye (2  $\mu\text{M}$ ). Cells were washed once in pre-warmed PBS and treatments were added to cells, with or without 2'(3')-O-(4-benzoylbenzoyl)adenosine 5'-triphosphate (BzATP, 100  $\mu\text{M}$ ) as agonist. Dye uptake was measured at 37 °C using a fluorescence plate reader (BMG Labtech); with data read at  $\lambda_{\text{Ex}485\text{nm}}/\lambda_{\text{Em}520\text{nm}}$  at 30 second intervals over a 70 min period. Maximal intensity was determined by the EC<sub>70</sub> value of agonist concentration (100  $\mu\text{M}$  BzATP) and each compound concentration was expressed as a percentage of this maximal intensity to account for any variability between single experiments. IC<sub>50</sub> values were determined from concentration-response curves derived from a four-parameter variable slope, analyzed in GraphPad Prism<sup>®</sup> (San Diego, CA).

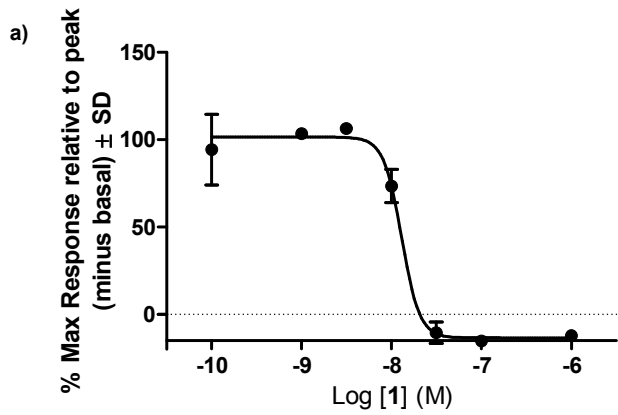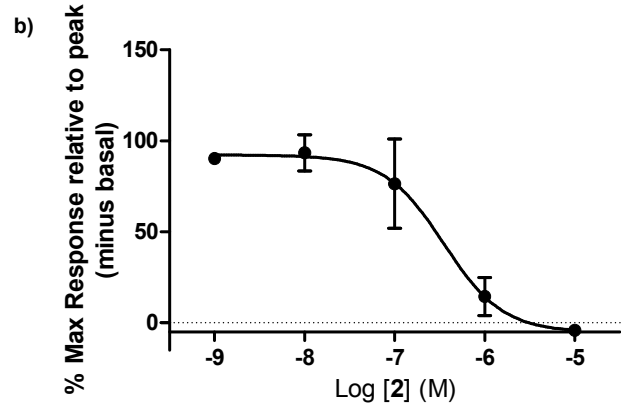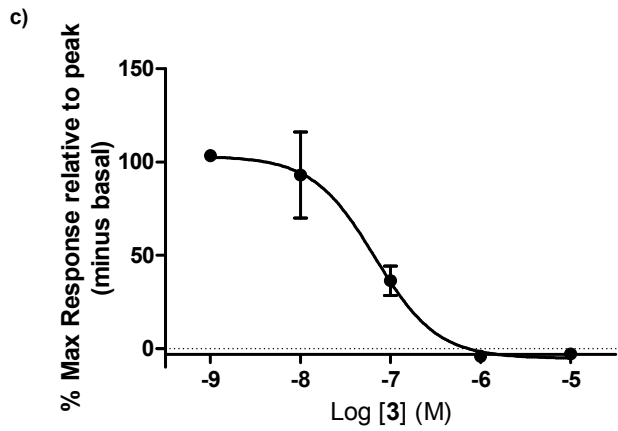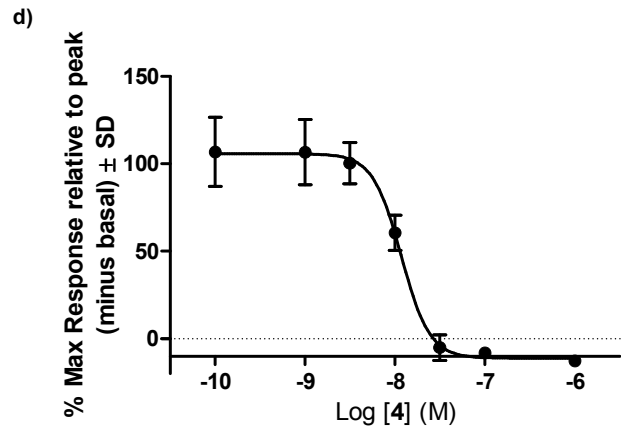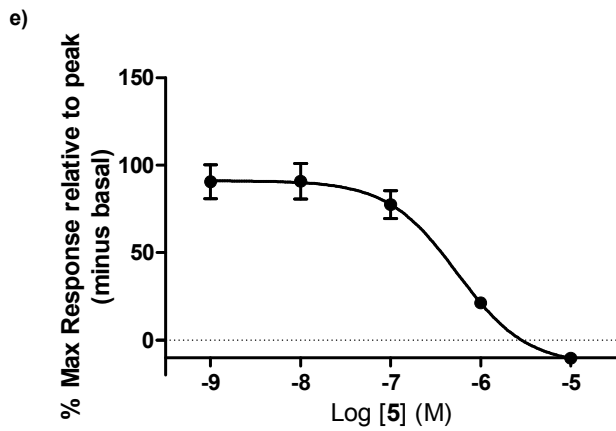

**Figure 2.** Inhibition of human P2X<sub>7</sub>R pore formation by a) adamantanyl **1**, b) cubanyl **2** c) trishomocubanyl **3**, d) *closo*-1,2-carboranyl **4**, and e) *nido*-7,8-carboranyl Cs:5 benzamides using a functional dye uptake assay in THP-1 cells. Pore formation was assessed by a BzATP-induced uptake of YO-PRO<sup>®</sup>-1.

## Forced Swim Test

### Animals and drug treatment

Wildtype (WT) and P2X<sub>7</sub><sup>-/-</sup> mice (C57BL6 background) were bred within our facilities at the Brain and Mind Research Institute. Female adult (12-16 weeks) mice were used for all experiments. All animals were group housed in cages of 2-5 under a reversed 12:12 h light-dark cycle with food and water available *ad libitum*. Before all behavioral testing, mice were handled for 3 days to reduce stress and were habituated to the testing room for 1 h before each experiment. All procedures were approved by “the University of Sydney animal ethics committee” and were in accordance with “the Australian code of practice for the care and use of animals for scientific purposes”. During both the tolerability study and the FST, animals were separated into different cohorts of mice to ensure they were all aged-matched. Each cohort included all groups of animals (i.e. WT<sub>VEH</sub>, WT<sub>compounds1-5</sub>, and P2X<sub>7</sub><sup>-/-</sup><sub>VEH</sub>) to avoid the possible confounding effect of different times of testing.

All compounds were dissolved in a vehicle (VEH) suitable for *in vivo* studies that consisted of 8% EtOH, 8% TWEEN<sup>®</sup> 80 and 84% saline. Drug and VEH treatments were injected intraperitoneally (i.p) at a volume of 10 ml/kg, 20 mins prior to testing in the FST on all 3 days. Compounds **1**, **2**, **4** and **5** were given at the maximal dose studied of 20 mg/kg while **3** was only given at 1 mg/kg as this compound did not completely dissolve at higher doses.

### Tolerability Study

Before assessing the compounds in a large number of animals in our behavioural model of depression, tolerability was assessed in single mice at escalating doses (0.1, 0.5, 1, 5, 10 and 20 mg/kg) compared to a VEH-treated mouse. Animals were weighed and injected with each compound starting from the lowest dose and then monitored closely during a 30 min Normal Behavioral Assessment (NBA) in their home cage. This assessment included recording any abnormalities in posture, activity, gait, respiratory pattern, hydration and bodily condition. At the end of the NBA, body temperature was taken using a mouse rectal probe connected to a thermocouple.<sup>15</sup> Locomotor activity was then assessed for 2 h, before body temperature was taken again. Locomotion was assessed in a perspex open field activity chamber (45 cm x 45 cm x 26 cm) under red light. Distance travelled was recorded by the computer software Trackmate 2.1 (Motion Mensura, Australia).<sup>16</sup> All mice were further monitored for adverse effects for 48 h, including weighing at 24 h.

### Forced Swim Test (FST)

Mice were tested in the FST using the same model employed to reveal the antidepressant phenotype of P2X<sub>7</sub><sup>-/-</sup> mice.<sup>16</sup> Each trial involved the placement of each mouse in a cylindrical container (height: 41 cm; diameter: 17 cm) with a water depth of 10 cm at ambient temperature (24-25 °C). The test duration was 6 min and immobility time was measured as the proportion of time spent in a passive immobile posture, allowing for minimal movements necessary to keep the animals' heads above water.<sup>17</sup> The computer software, Trackmate 2.1 (Motion Mensura, Australia) measured immobility time, which was used as a marker of behavioural despair. The total immobility time (s) each mouse remained stationary over the final 3 min of the Forced-Swim Test (FST) was averaged and compared against the WT cohort using a Mann-Whitney U-test analysis.<sup>18</sup>

# $^1\text{H}$ and $^{13}\text{C}$ NMR spectra

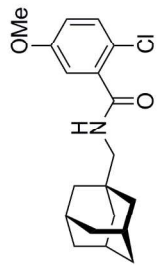

*N*-(Adamantan-1-ylmethyl)-2-chloro-5-methoxybenzamide **1**

$^1\text{H}$  NMR spectrum

500 MHz,  $\text{CDCl}_3$ , 300 K

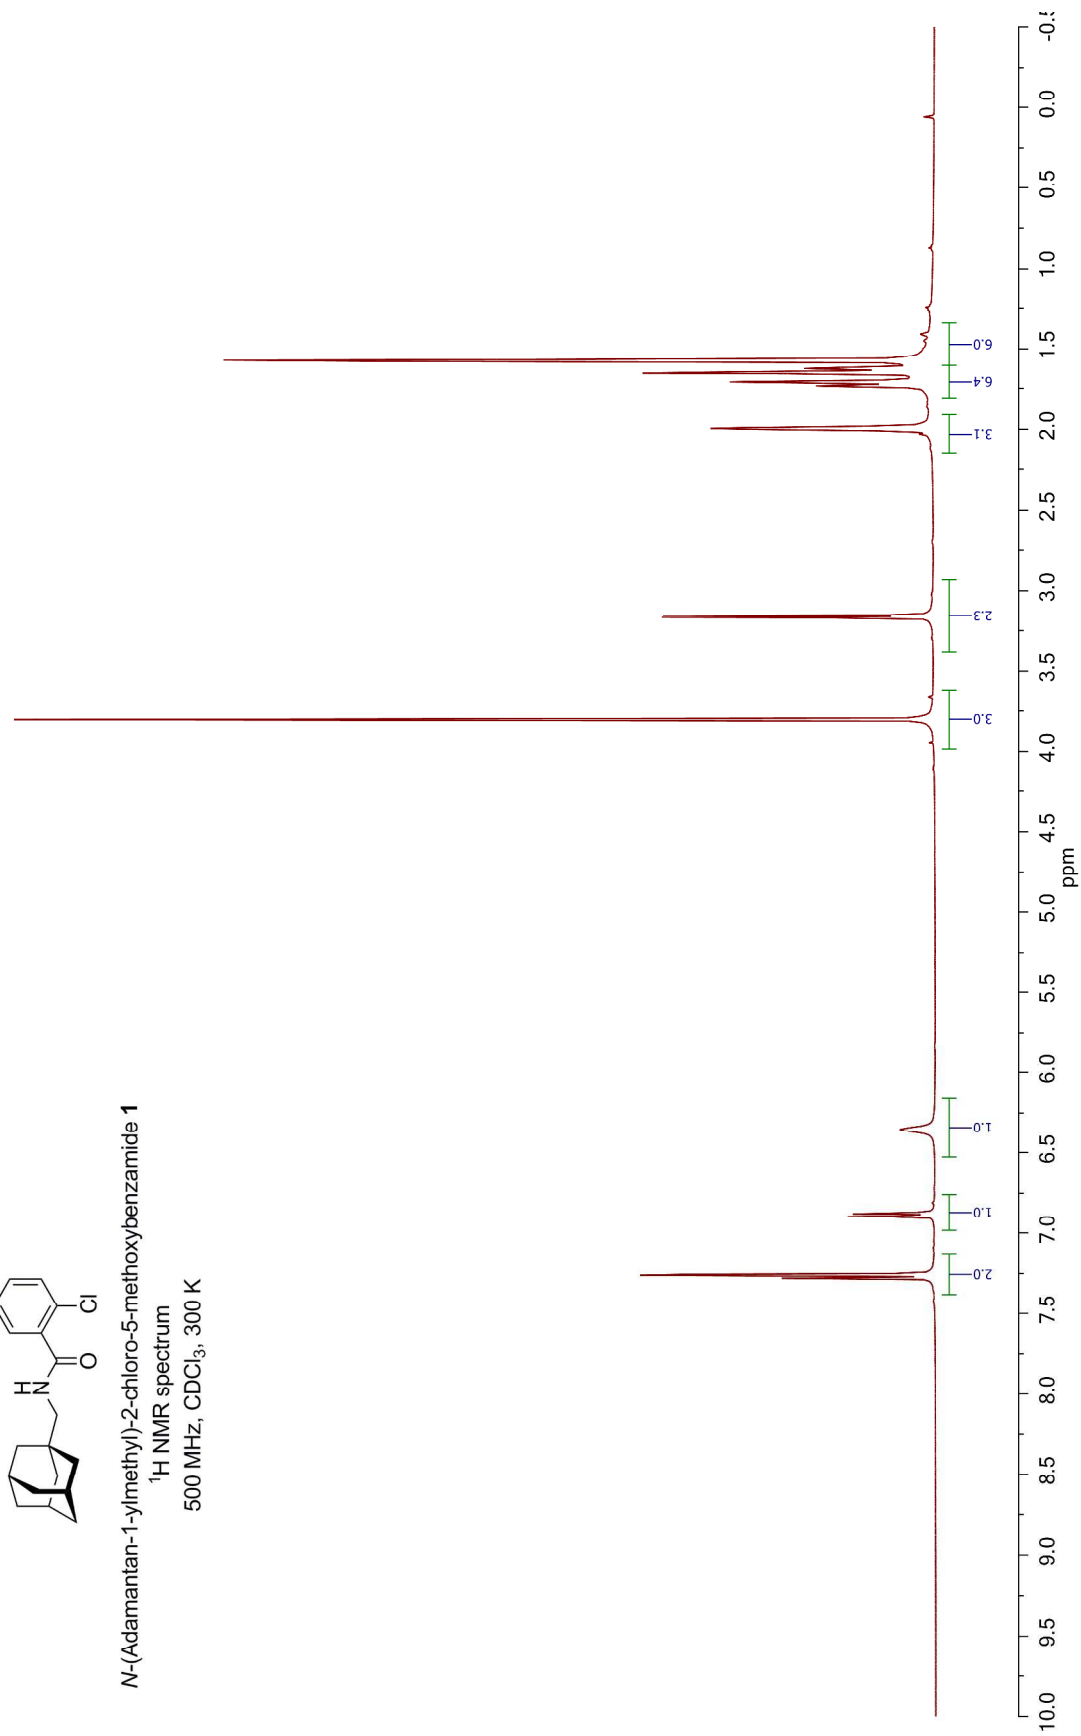

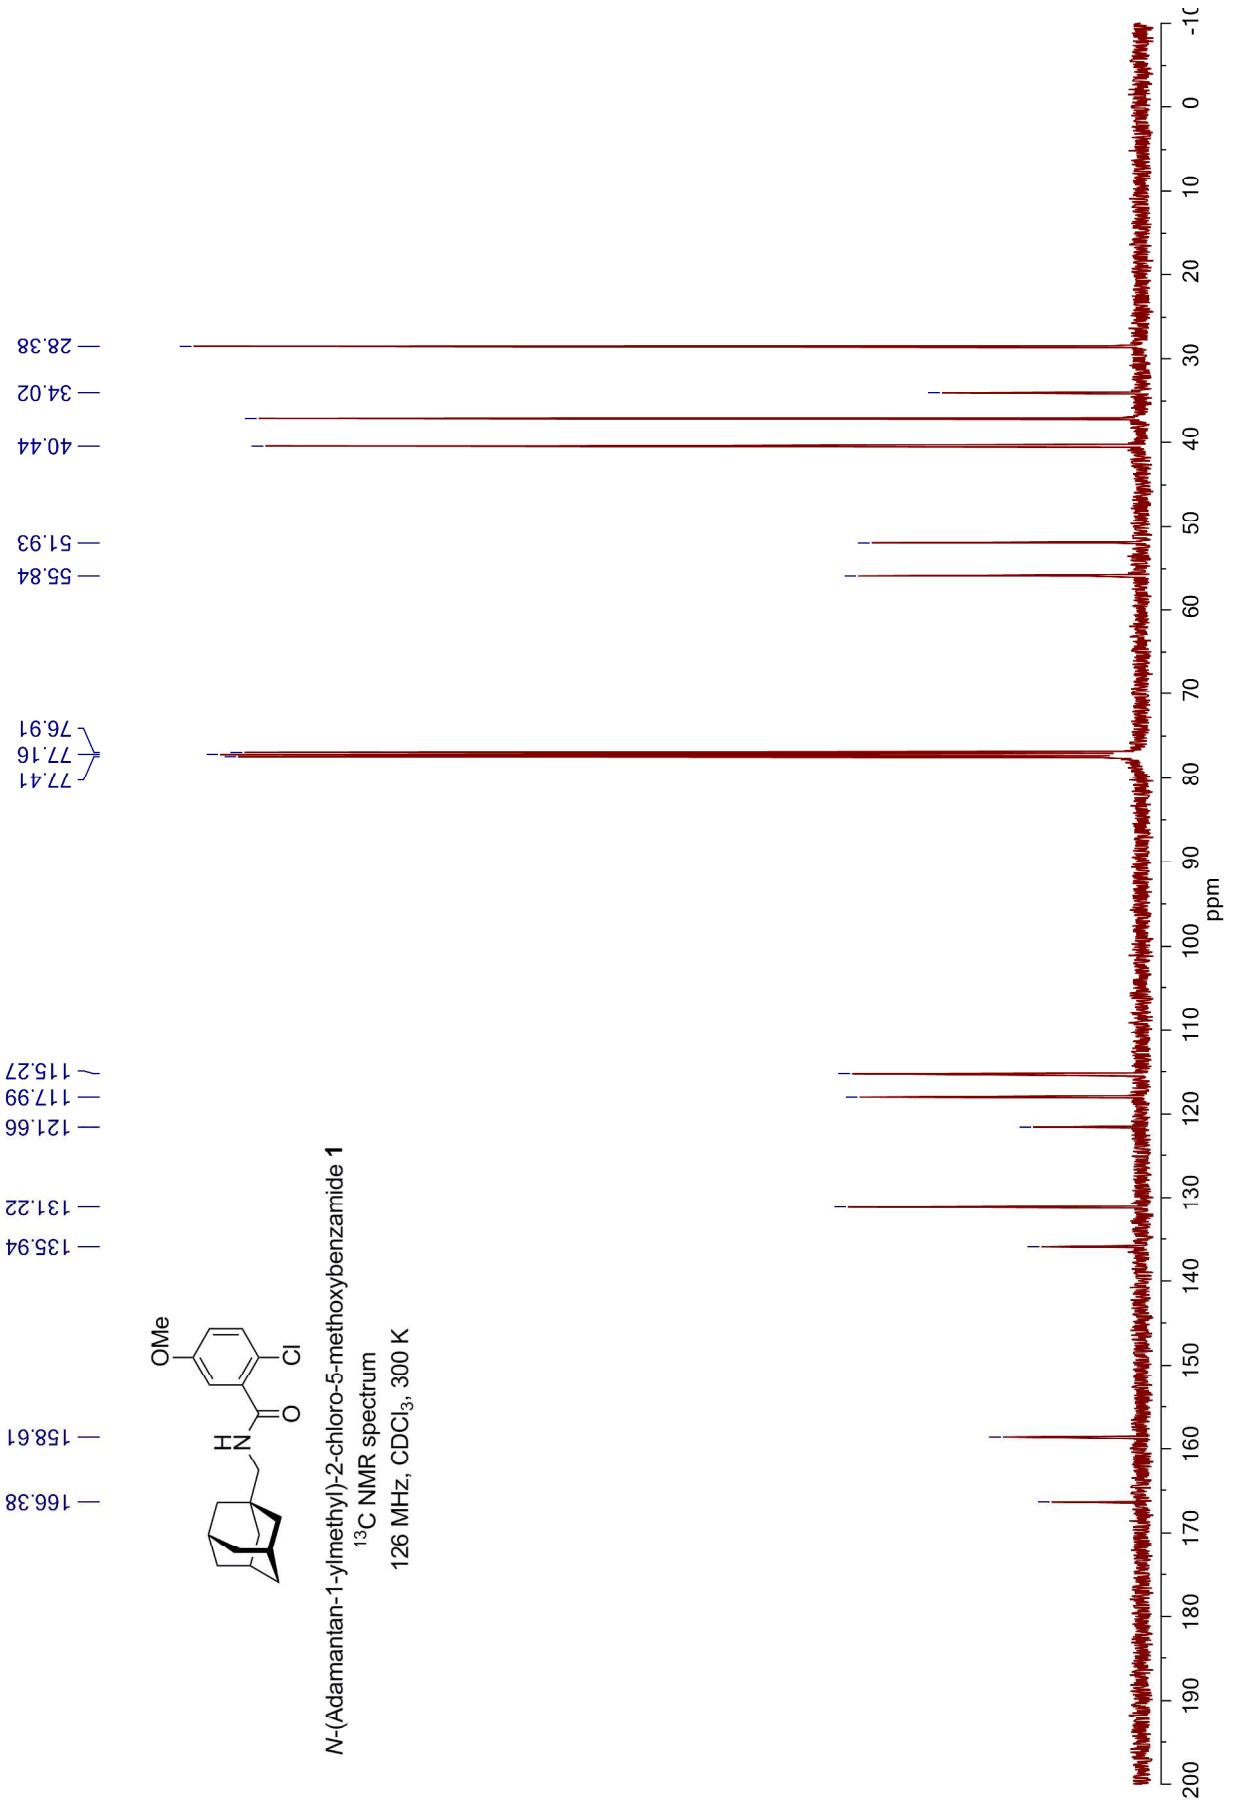



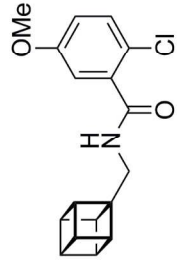

2-Chloro-N-(cubane-1-methyl)-5-methoxybenzamide **2**

<sup>1</sup>H NMR spectrum

400 MHz, d<sub>6</sub>-DMSO, 300 K

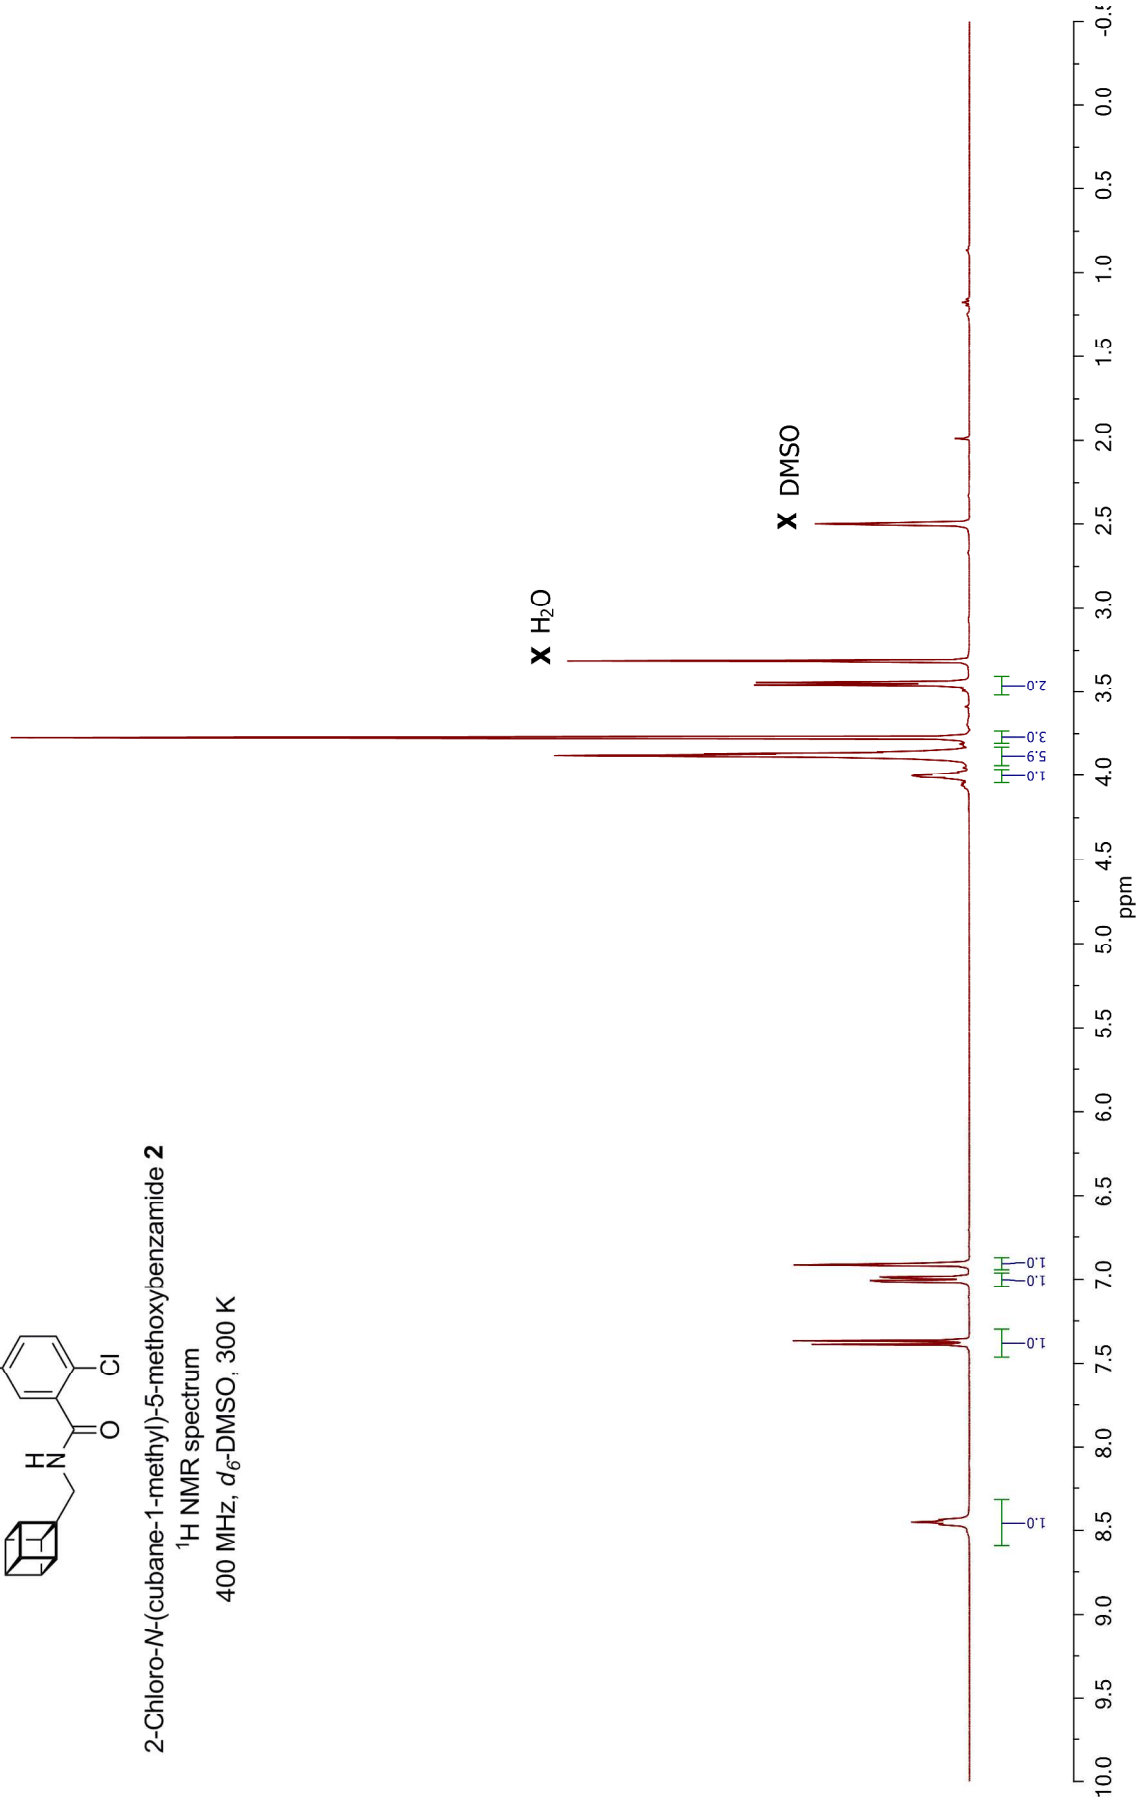

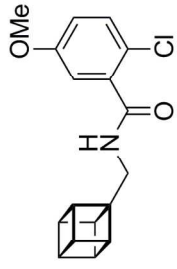

2-Chloro-N-(cubane-1-methyl)-5-methoxybenzamide **2**

<sup>13</sup>C NMR spectrum

101 MHz, d<sub>6</sub>-DMSO, 300 K

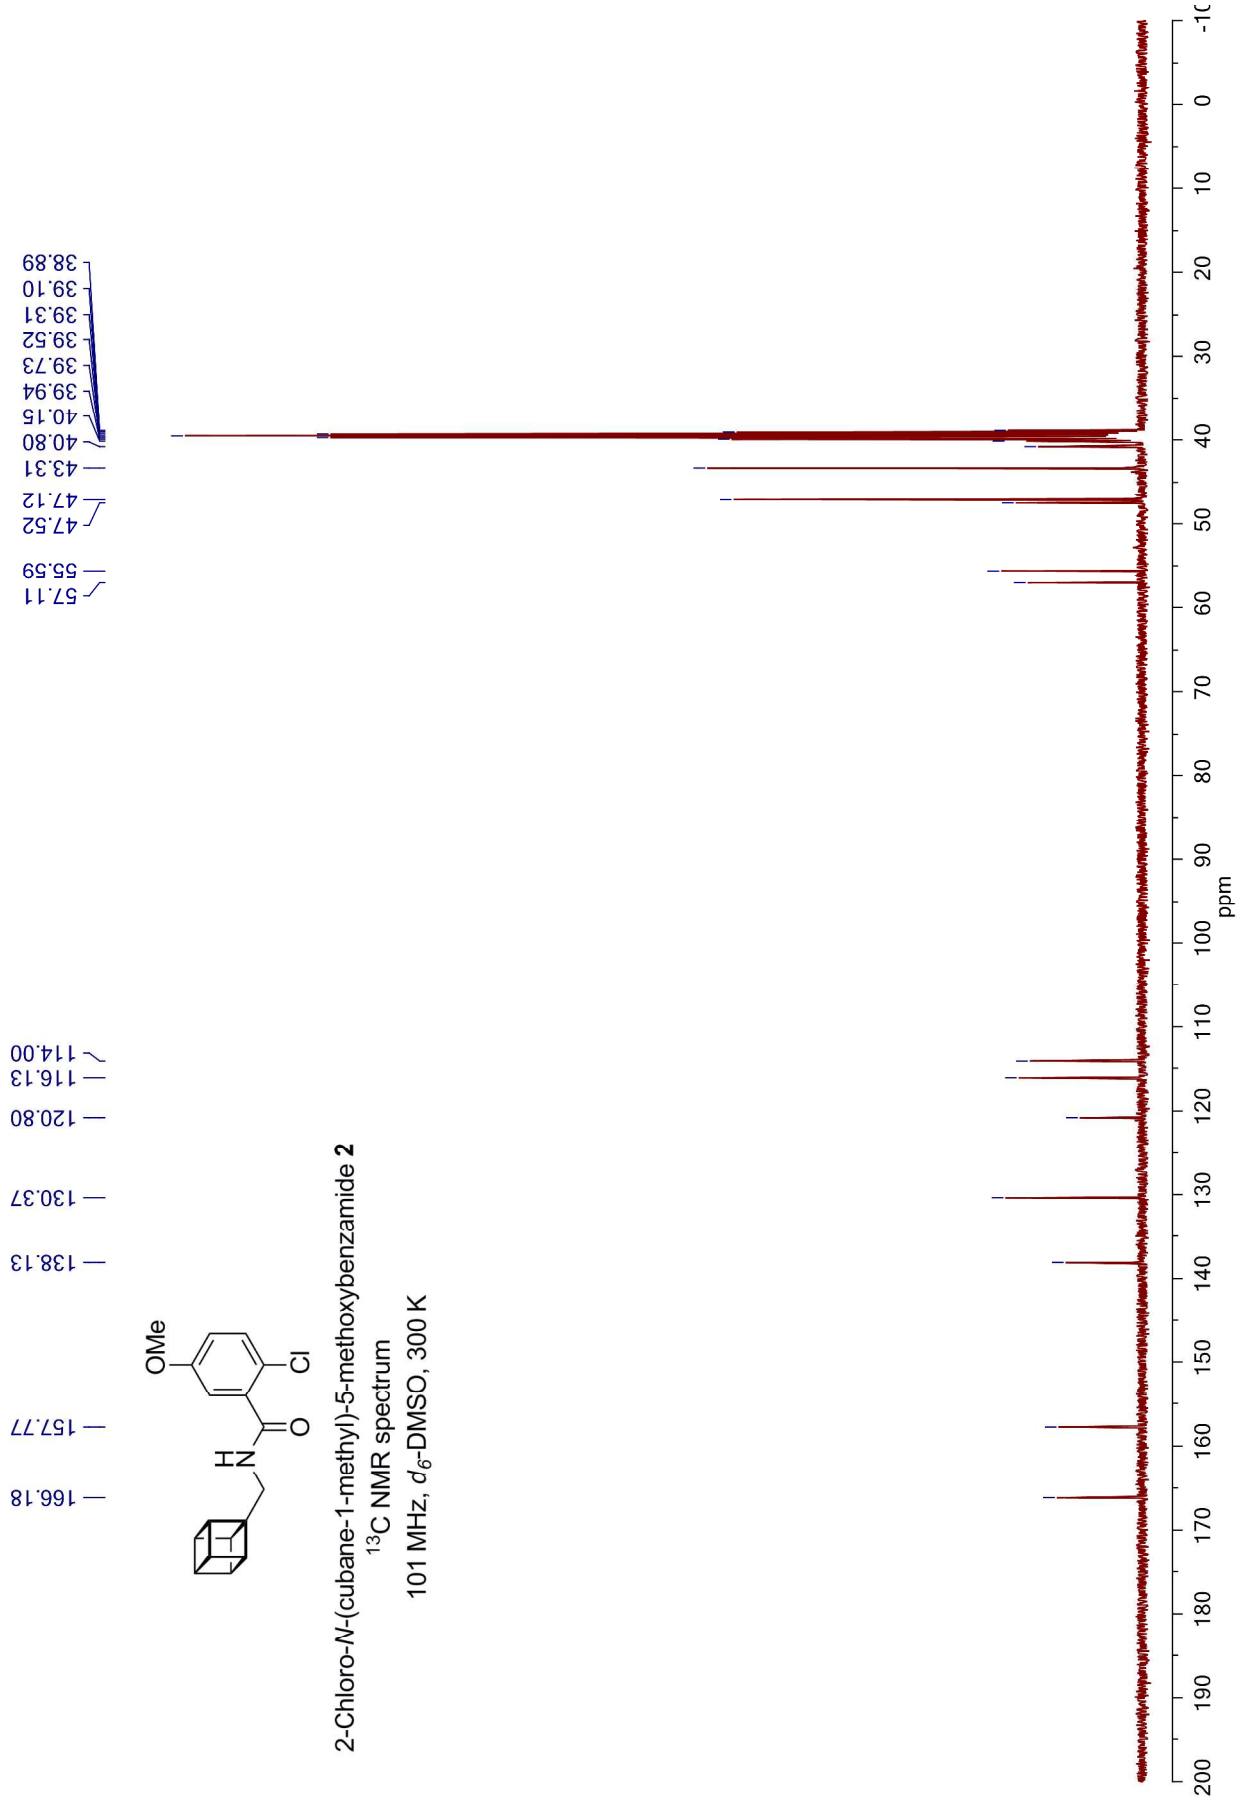

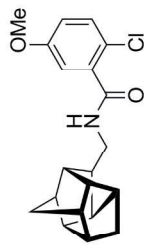

**3** *N*-(*D*<sub>3</sub>-Trishomocubane-4-ylmethyl)-2-chloro-5-methoxybenzamide

<sup>1</sup>H NMR spectrum

600 MHz, CDCl<sub>3</sub>, 303 K

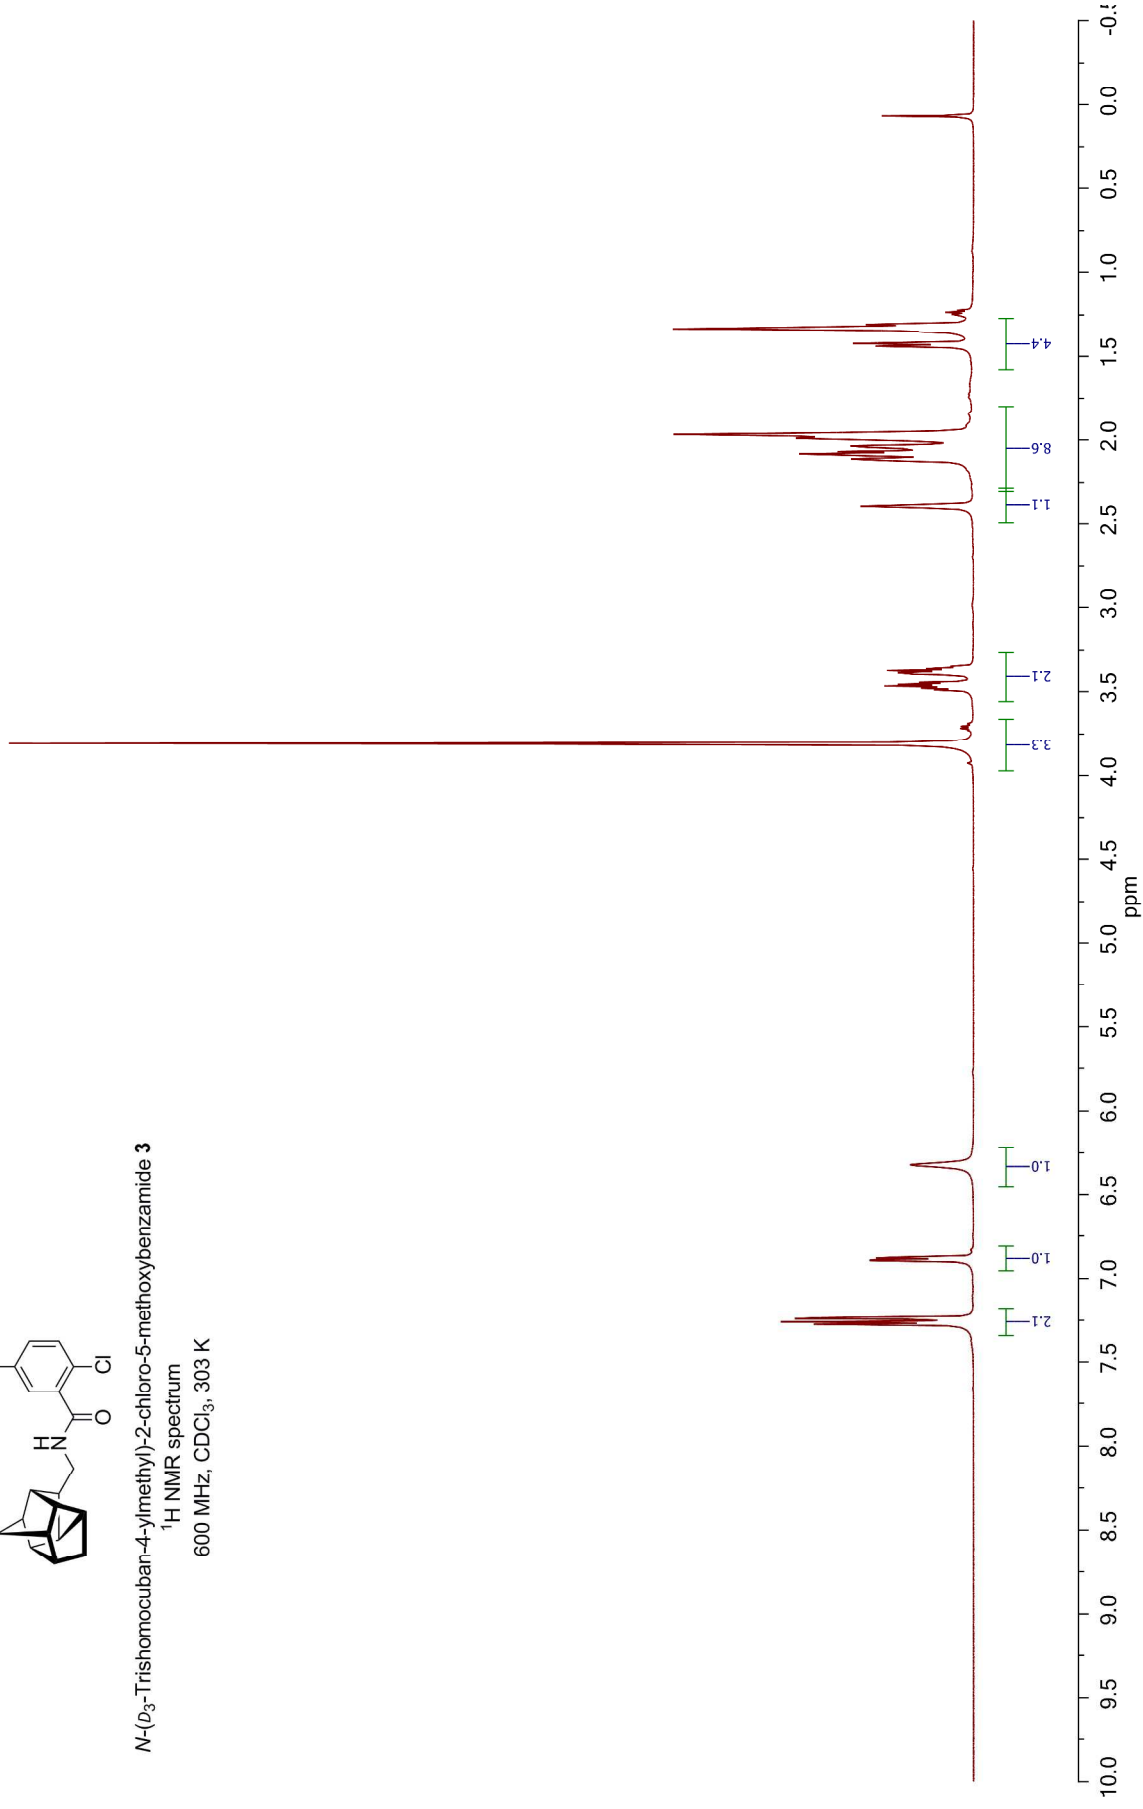

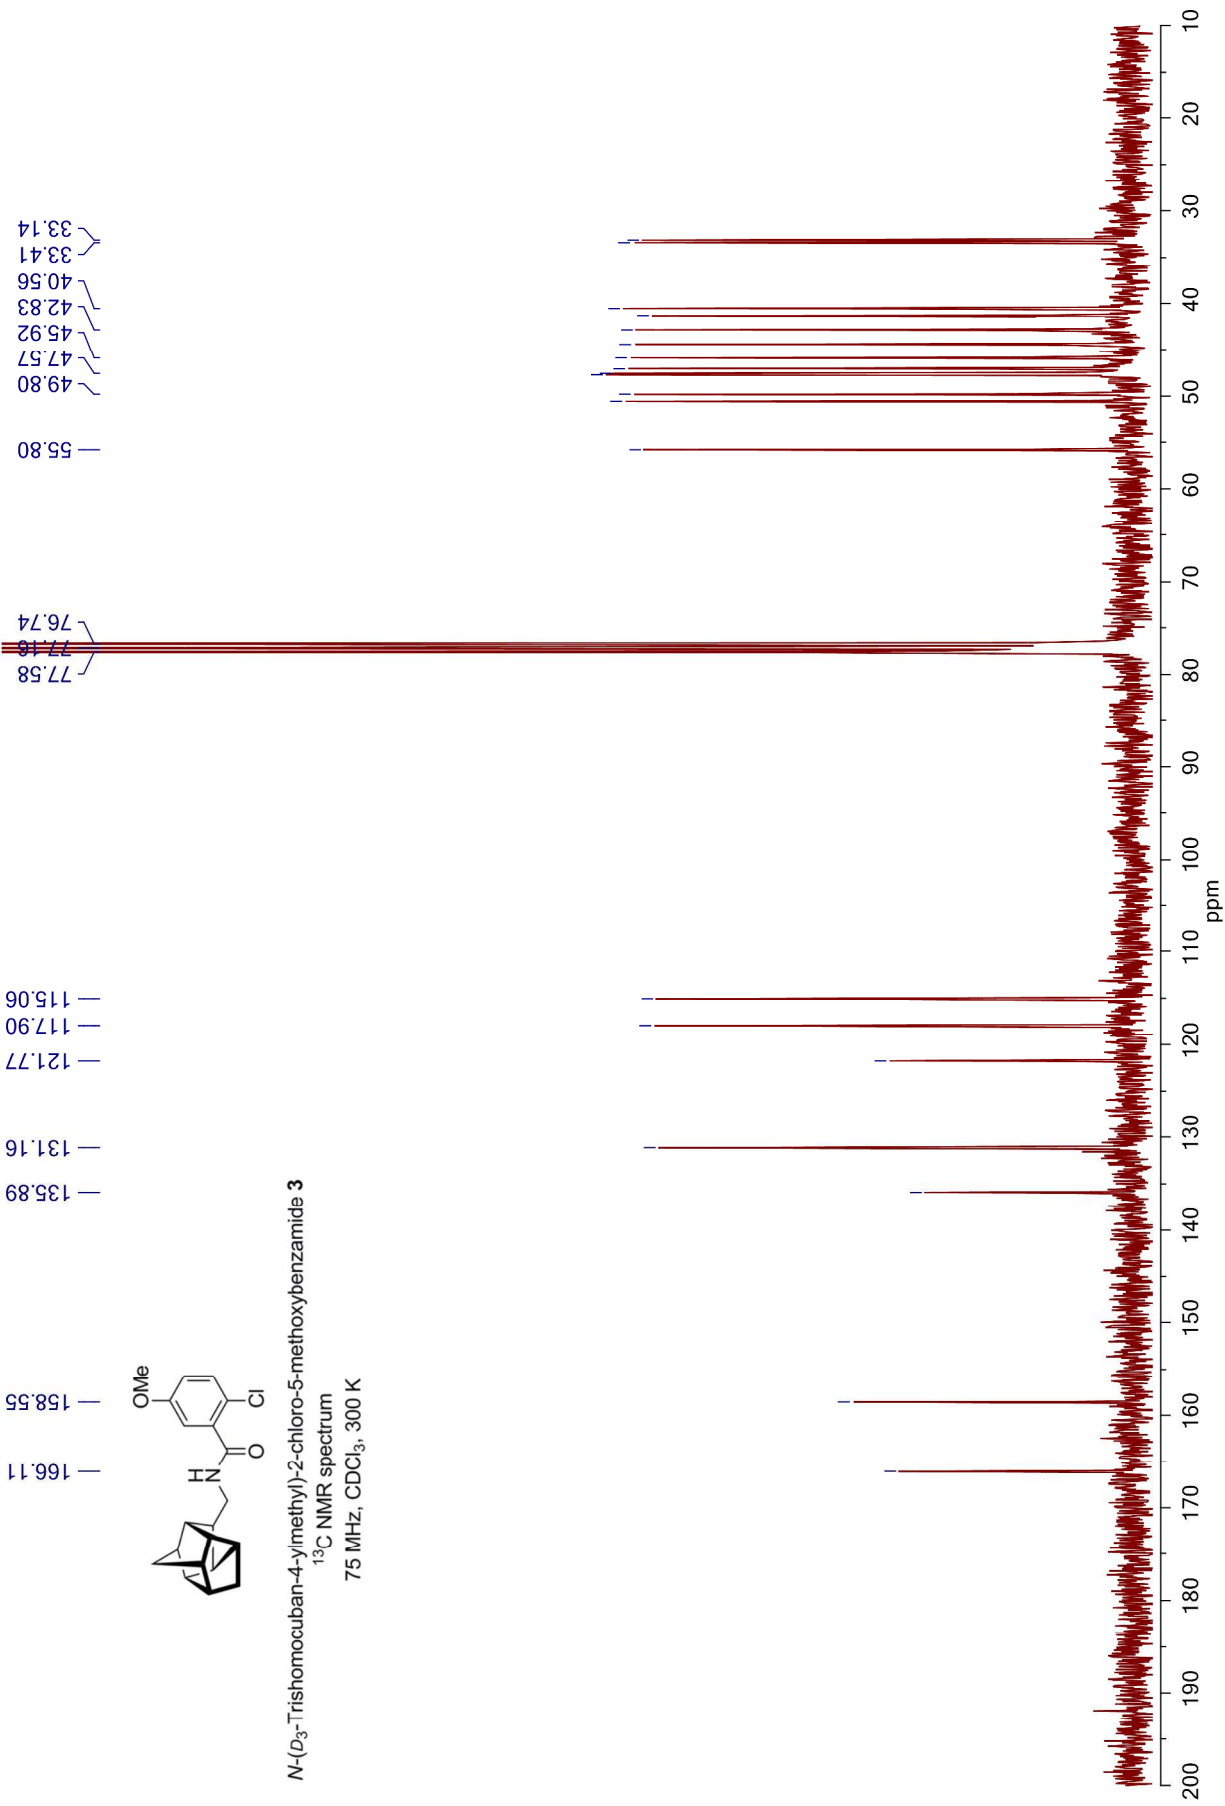

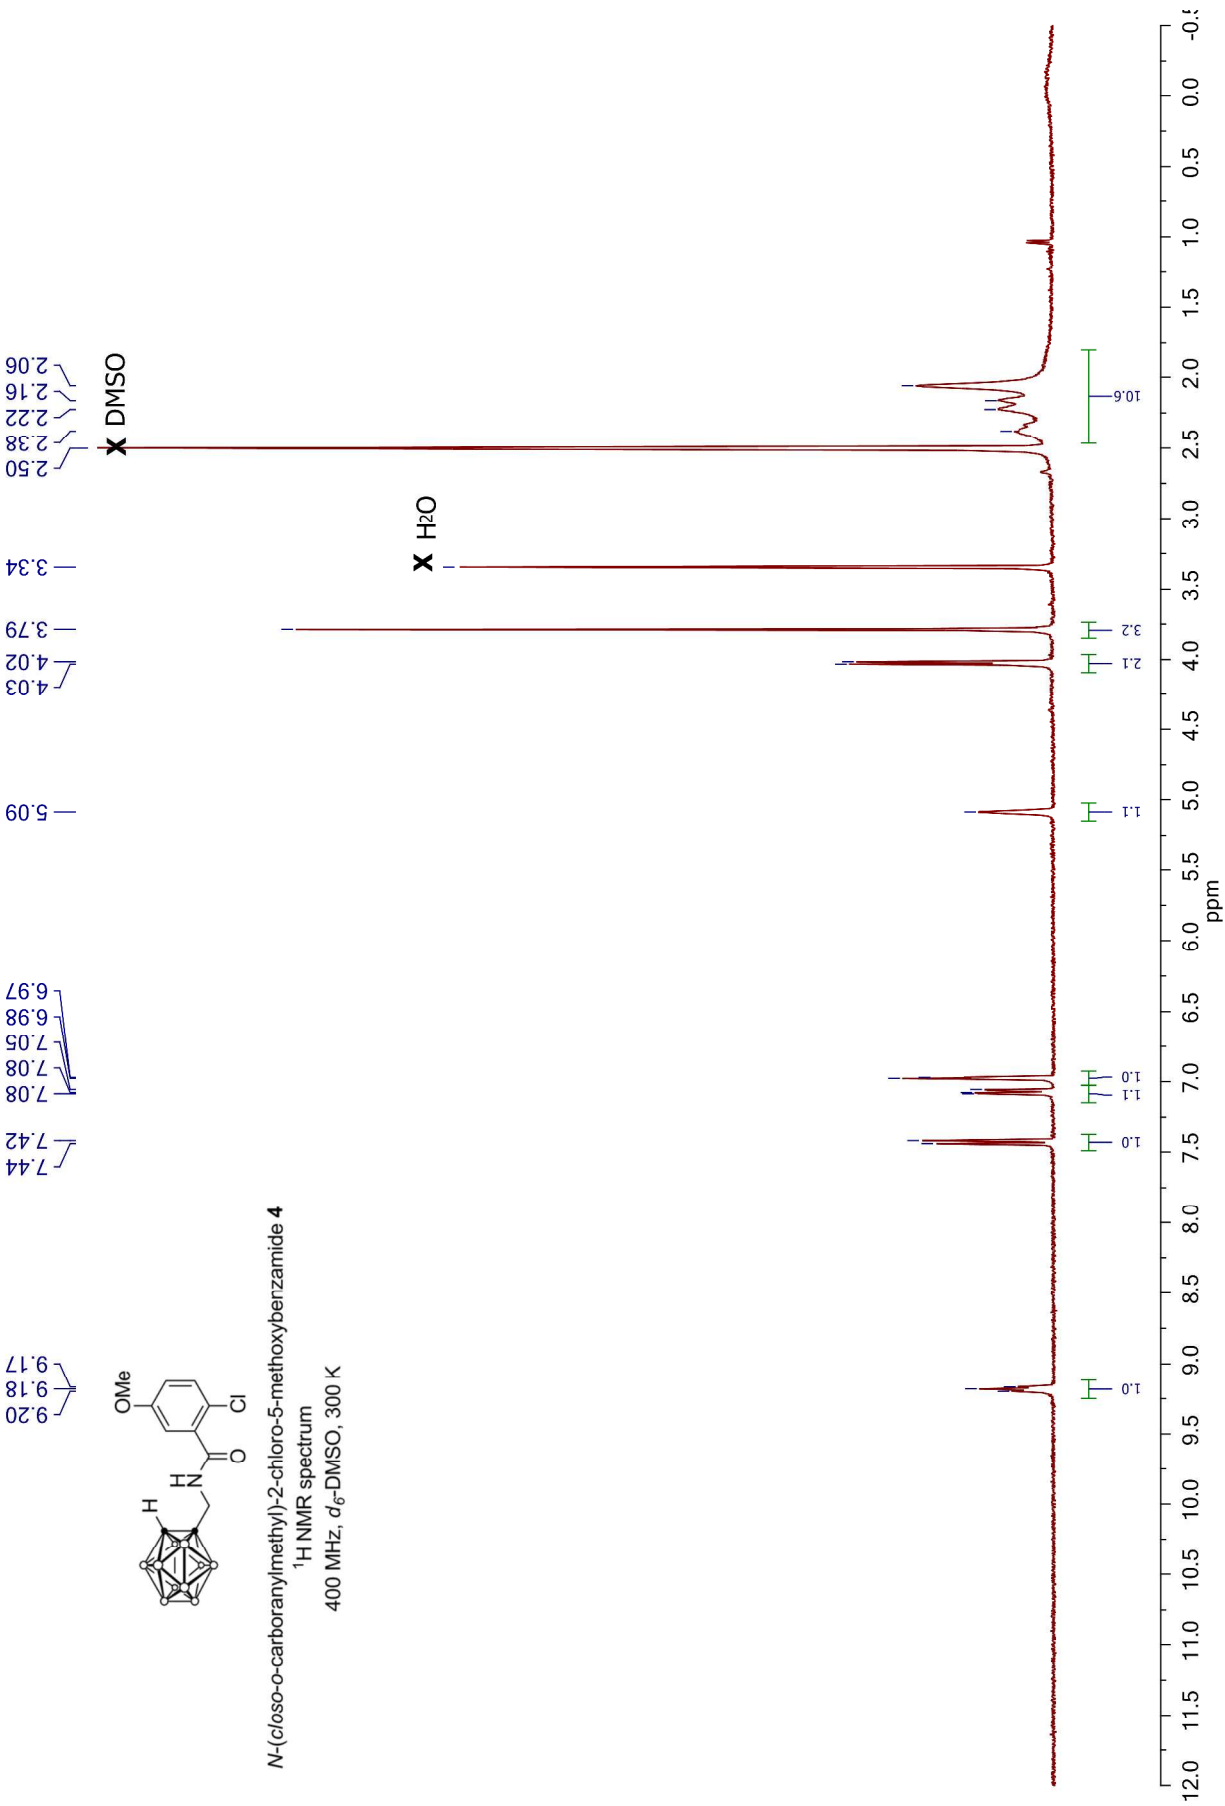



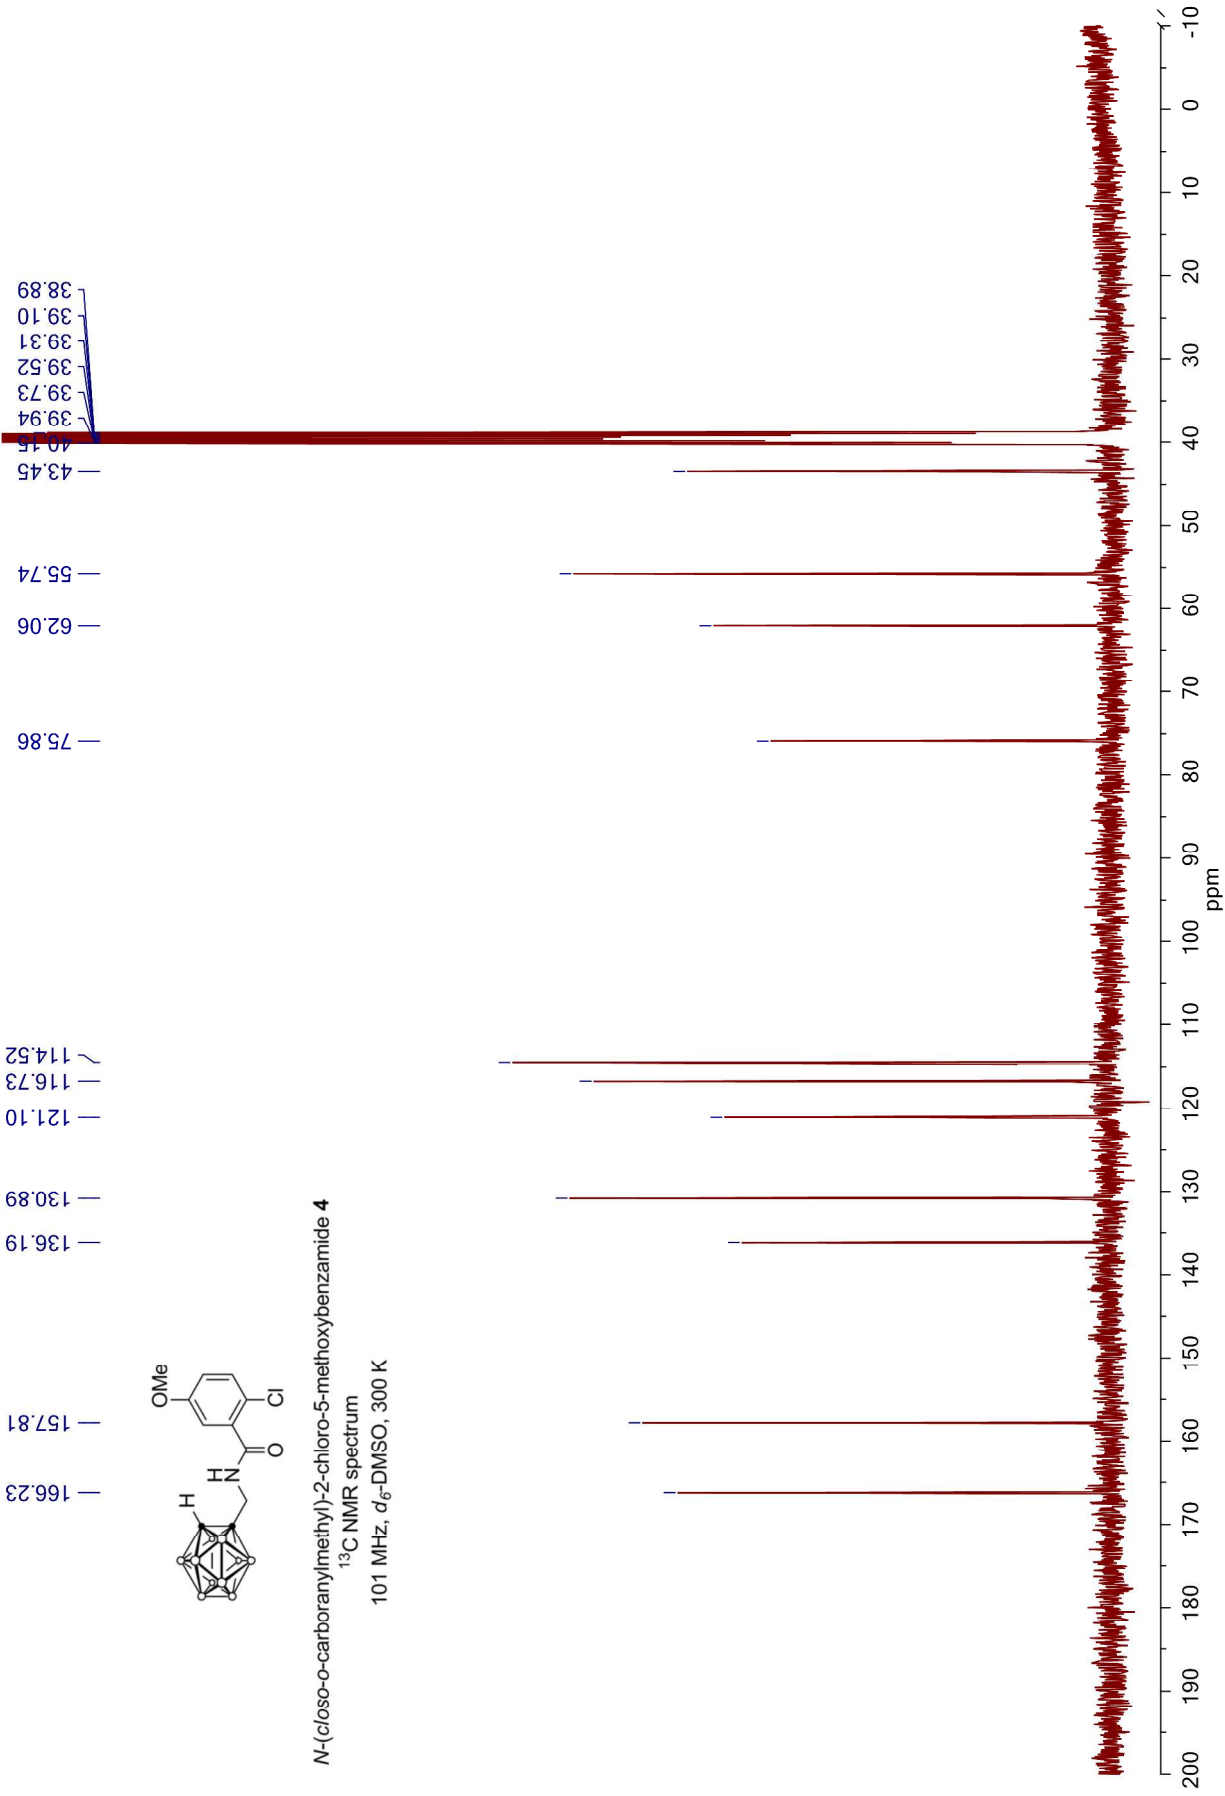

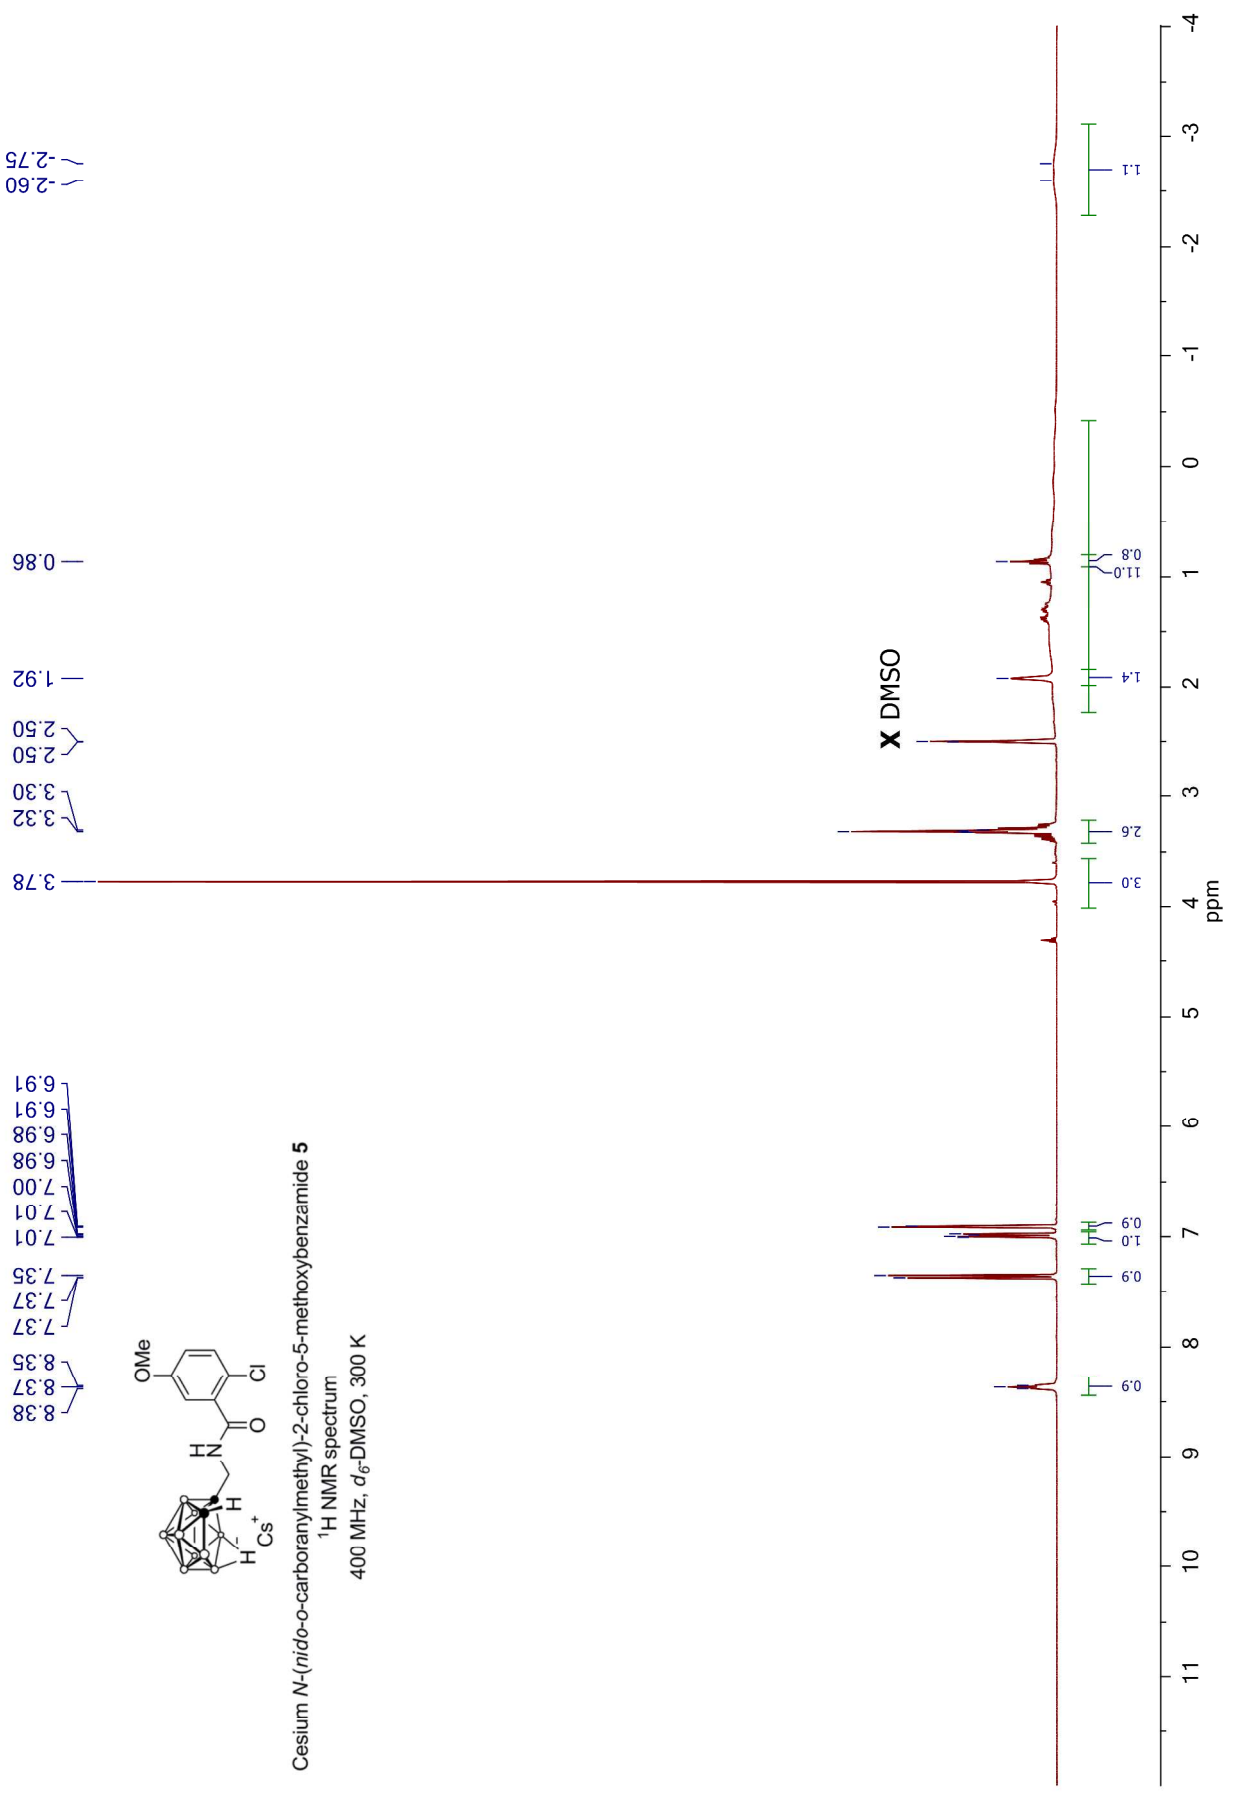



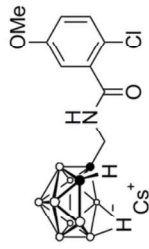

Cesium *N*-(*nido*-*o*-carboranylmethyl)-2-chloro-5-methoxybenzamide **5**

$^{11}\text{B}$  NMR spectrum

128 MHz,  $d_6$ -DMSO, 300 K

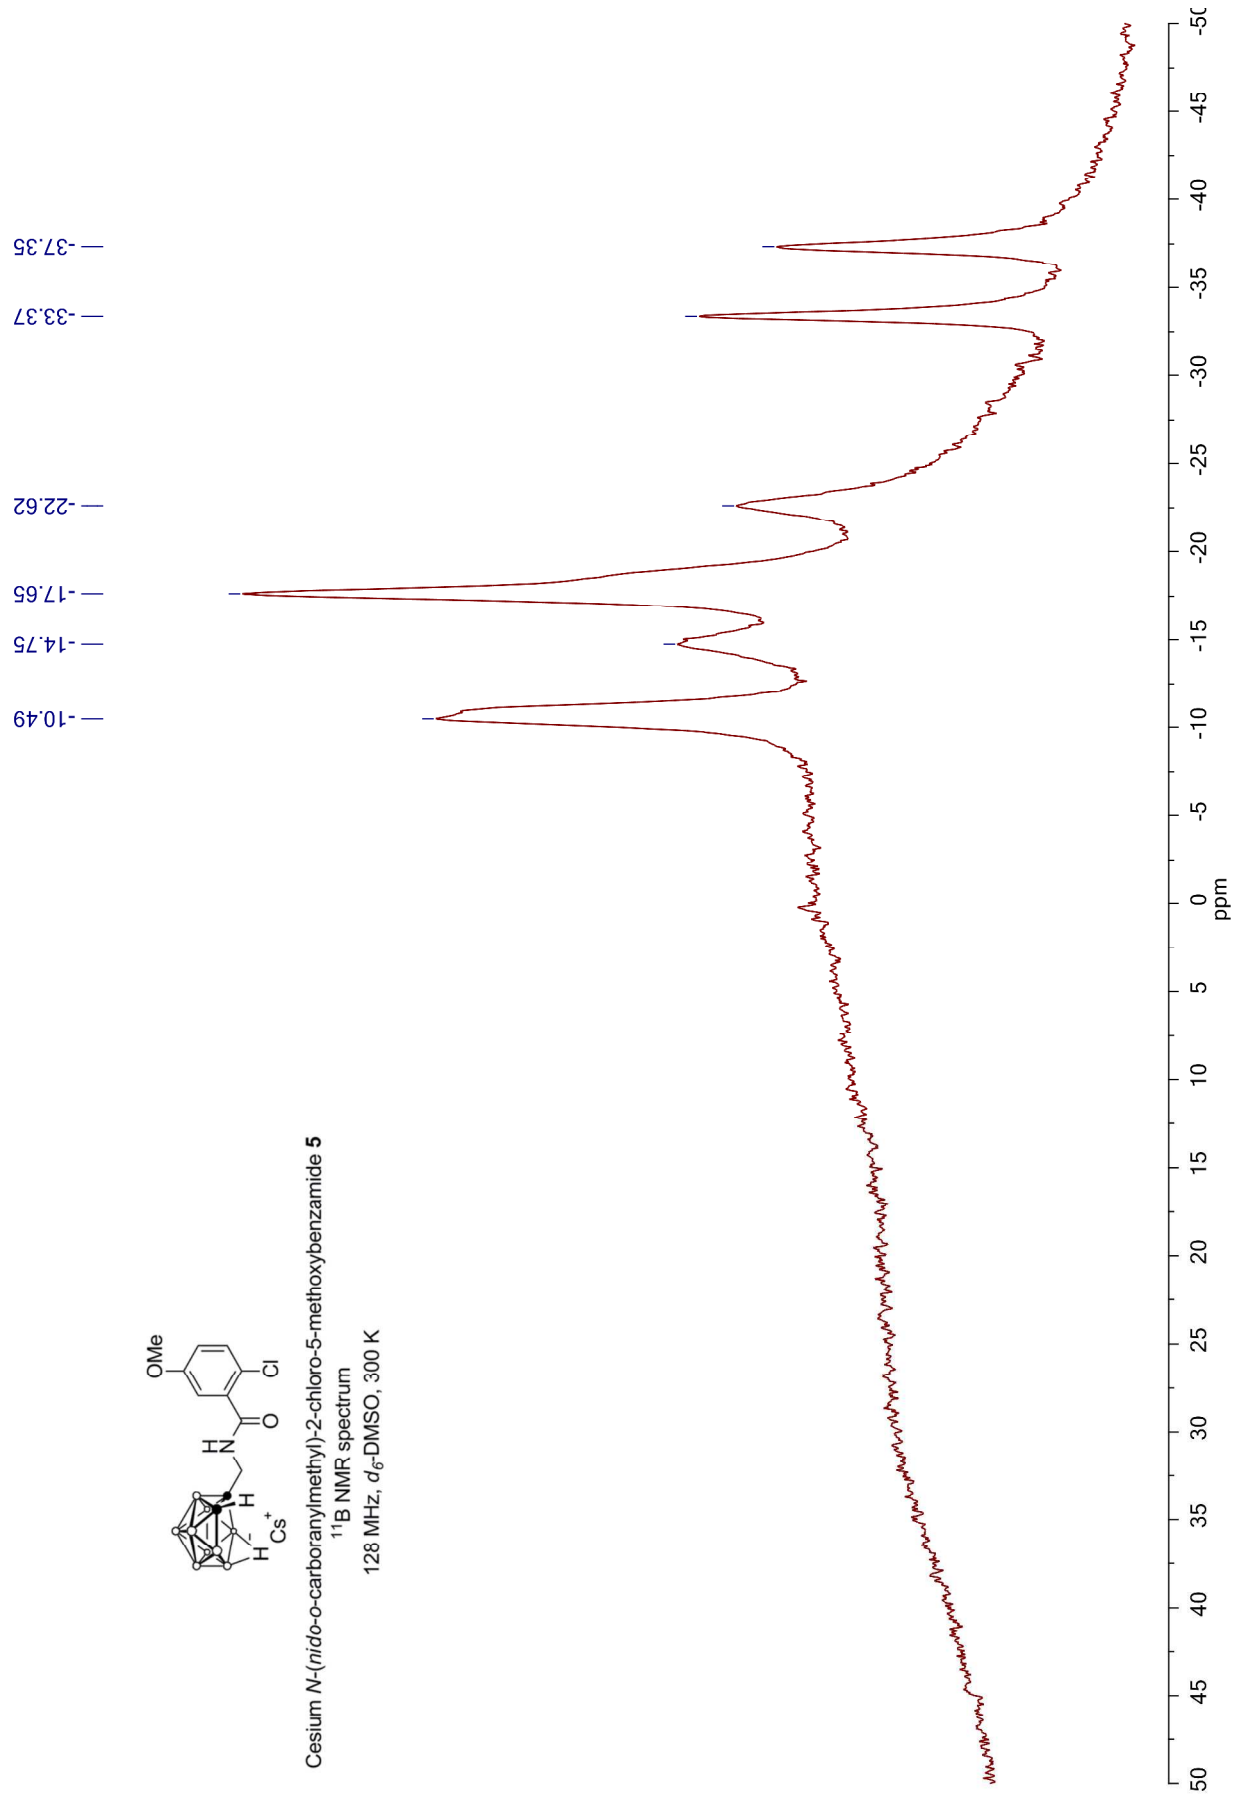

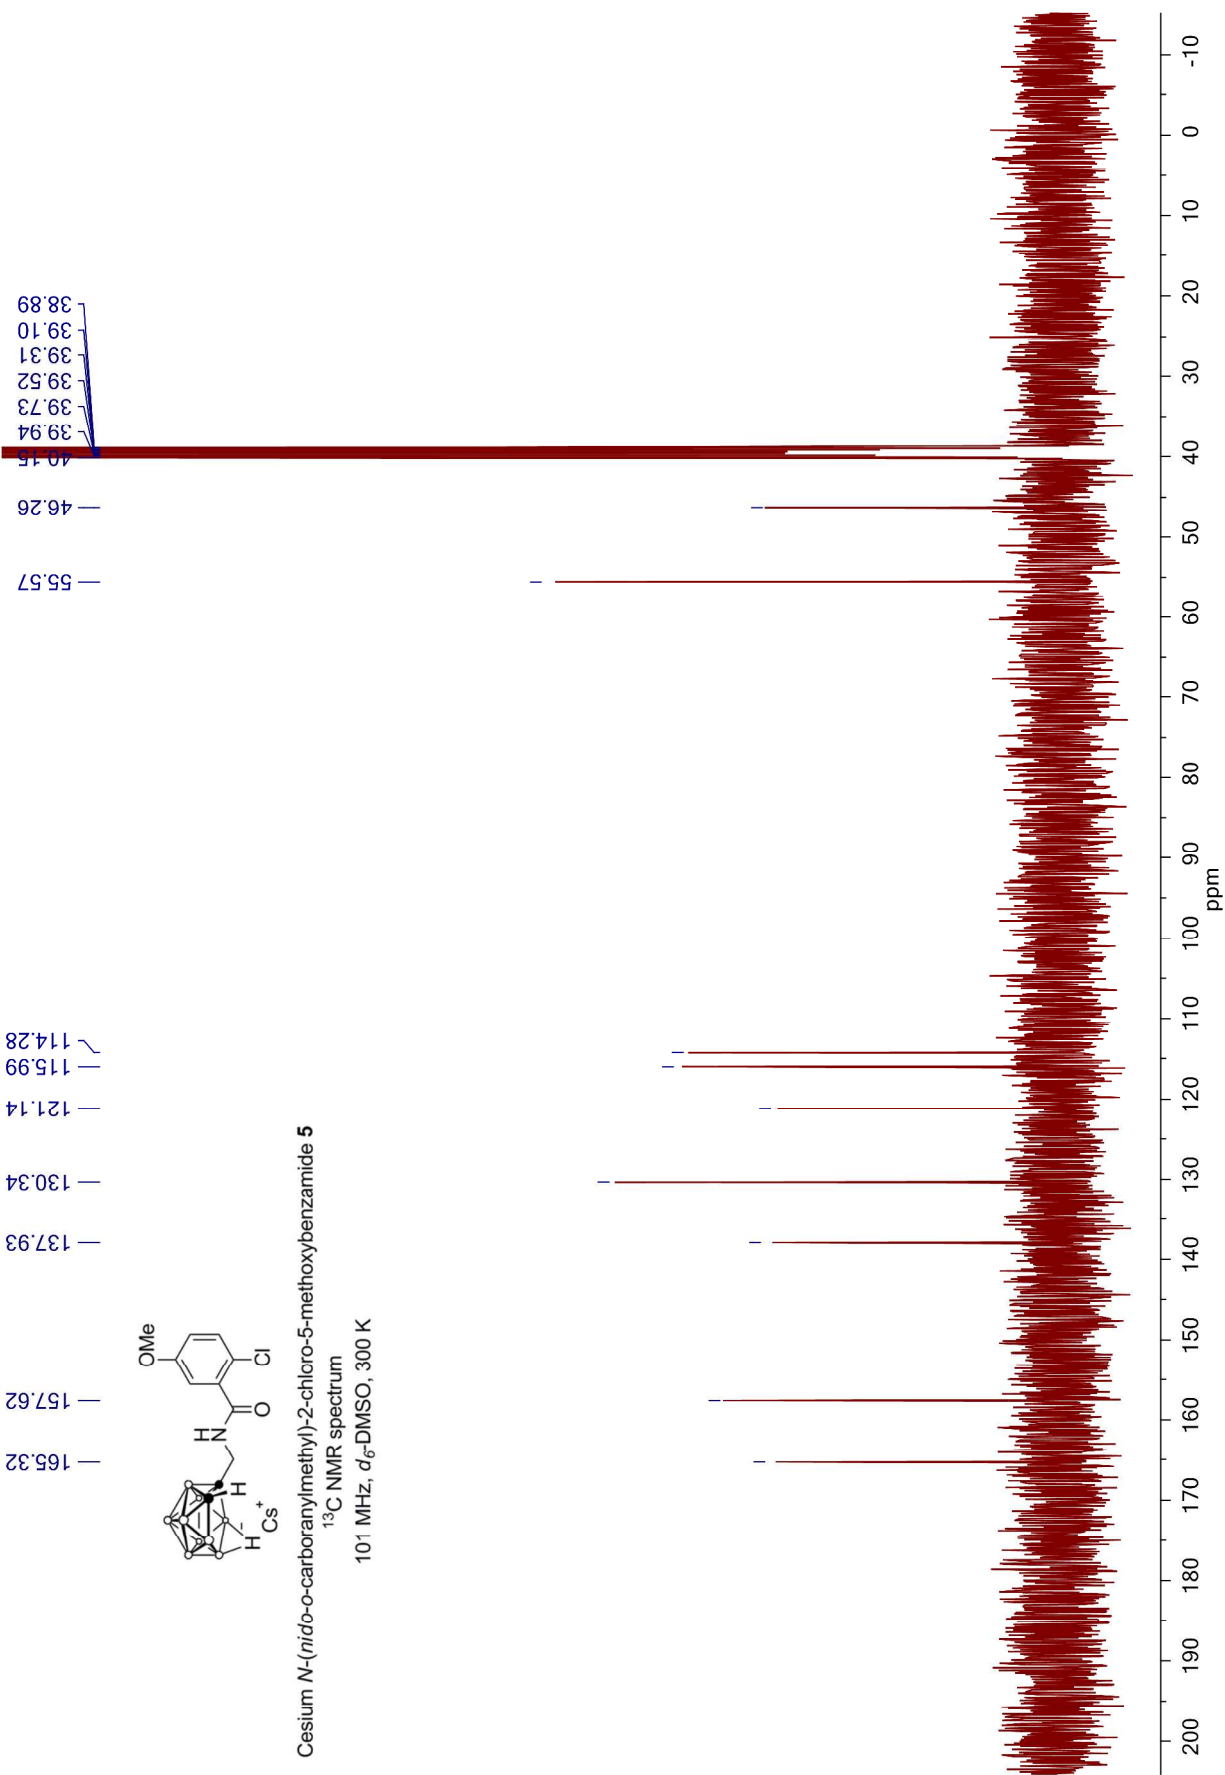

Cubanyl benzamide 2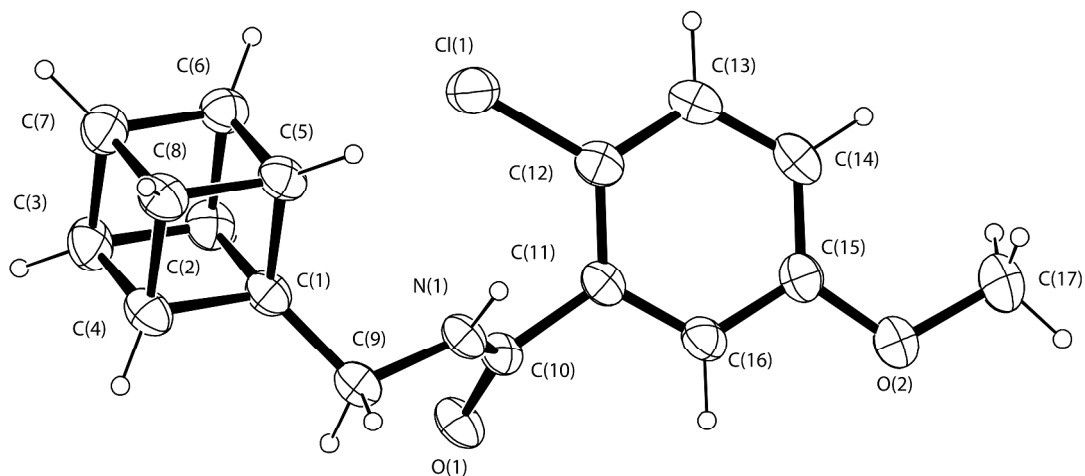

**Figure 3.** The asymmetric unit for the single crystal structure determination of 2-chloro-*N*-(cubane-1-methyl)-5-methoxybenzamide 2 (CCDC 966907). Anisotropic displacement ellipsoids are given at 50% probability levels for the non-hydrogen atoms.

Experimental Details for 2-chloro-*N*-(cubane-1-methyl)-5-methoxybenzamide (2)

A colorless plate like crystal was attached with Exxon Paratone N, to a short length of fibre supported on a thin piece of copper wire inserted in a copper mounting pin. The crystal was quenched in a cold N<sub>2</sub> gas stream from an Oxford Cryosystems Cryostream A SuperNova Dual equipped with an Atlas detector and employing mirror monochromated Cu(K $\alpha$ ) radiation from a micro-source was used for the data collection. Cell constants were obtained from a least squares refinement against 6986 reflections located between 10 and 148° 2 $\theta$ . Data were collected at 150(2) Kelvin with  $\omega$  scans to 150° 2 $\theta$ . The data processing was undertaken with CrysAlisPro<sup>19</sup> and subsequent computations were carried out with the XP SHELXTL-Plus<sup>20</sup> and WinGX<sup>21</sup> graphical user interfaces. A multi-scan absorption correction was applied to the data.

The structure was solved in the space group *C*12/*c*1(#15) by direct methods with SIR97<sup>22</sup> and extended and refined with SHELXL-97<sup>23</sup>. The non-hydrogen atoms in the asymmetric unit were modelled with anisotropic displacement parameters and in general a riding atom model was used for the hydrogen atoms. The amide hydrogen site was located in final difference maps and modelled with an isotropic displacement parameter. An ORTEP<sup>24</sup> depiction of the molecule with 50% displacement ellipsoids is provided in **Figure 3**.

**Table 2.** Results for 2-chloro-*N*-(cubane-1-methyl)-5-methoxybenzamide 2

|                                                                         |                                                   |
|-------------------------------------------------------------------------|---------------------------------------------------|
| Formula of the Refinement Model                                         | C <sub>17</sub> H <sub>16</sub> ClNO <sub>2</sub> |
| Model Molecular Weight                                                  | 301.76                                            |
| Crystal System                                                          | monoclinic                                        |
| Space Group                                                             | C12/c1(#15)                                       |
| <i>a</i>                                                                | 34.4384(13) Å                                     |
| <i>b</i>                                                                | 8.3183(3) Å                                       |
| <i>c</i>                                                                | 8.3183(3) Å                                       |
| $\beta$                                                                 | 90.322(3)                                         |
| <i>V</i>                                                                | 2807.84(17) Å <sup>3</sup>                        |
| <i>D</i> <sub>c</sub>                                                   | 1.428 g cm <sup>-3</sup>                          |
| <i>Z</i>                                                                | 8                                                 |
| Crystal Size                                                            | 1.428 x 1.428 x 0.033 mm                          |
| Crystal Color                                                           | Colorless                                         |
| Crystal Habit                                                           | plate                                             |
| Temperature                                                             | 150(2) Kelvin                                     |
| $\lambda$ (CuK $\alpha$ )                                               | 1.5418 Å                                          |
| $\mu$ (CuK $\alpha$ )                                                   | 2.439 mm <sup>-1</sup>                            |
| <i>T</i> <sub>min,max</sub>                                             | 0.658, 1.00                                       |
| 2 $\theta$ <sub>max</sub>                                               | 150.00                                            |
| <i>hkl</i> range                                                        | -41 41, -10 10, -12 12                            |
| <i>N</i>                                                                | 12464                                             |
| <i>N</i> <sub>ind</sub>                                                 | 2798( <i>R</i> <sub>merge</sub> 0.0340)           |
| <i>N</i> <sub>obs</sub>                                                 | 2563(1 > 2 $\sigma$ (1))                          |
| <i>N</i> <sub>var</sub>                                                 | 195                                               |
| Residuals* <i>R</i> 1( <i>F</i> ), <i>wR</i> 2( <i>F</i> <sup>2</sup> ) | 0.0414, 0.1142                                    |
| GoF(all)                                                                | 1.230                                             |
| Residual Extrema                                                        | -0.416, 0.732 e <sup>-</sup> Å <sup>-3</sup>      |

\* $R1 = \sum ||F_o| - |F_c|| / \sum |F_o|$  for  $F_o > 2\sigma(F_o)$ ;  $wR2 = (\sum w(F_o^2 - F_c^2)^2 / \sum w(F_c^2)^2)^{1/2}$  all reflections

$w = 1 / [\sigma^2(F_o^2) + (0.05P)^2 + 0.13P]$  where  $P = (F_o^2 + 2F_c^2) / 3$

**Table 3.** Non-Hydrogen Atom Coordinates, Isotropic Thermal Parameters and Occupancies

| Atom  | x            | y            | z           | $U_{eq}(\text{\AA}^2)$ | Occ |
|-------|--------------|--------------|-------------|------------------------|-----|
| Cl(1) | 0.086689(13) | 0.25771(5)   | 0.36102(5)  | 0.03818(16)            | 1   |
| O(1)  | 0.15341(4)   | 0.40480(15)  | 0.66345(11) | 0.0335(3)              | 1   |
| O(2)  | 0.24515(4)   | -0.00087(18) | 0.41467(16) | 0.0483(4)              | 1   |
| N(1)  | 0.14402(4)   | 0.53666(17)  | 0.46216(13) | 0.0268(3)              | 1   |
| C(1)  | 0.08731(5)   | 0.7131(2)    | 0.48394(16) | 0.0282(4)              | 1   |
| C(2)  | 0.05274(5)   | 0.6080(2)    | 0.53709(17) | 0.0323(4)              | 1   |
| C(3)  | 0.02898(6)   | 0.7649(2)    | 0.56874(19) | 0.0364(4)              | 1   |
| C(4)  | 0.06351(5)   | 0.8700(2)    | 0.51549(17) | 0.0323(4)              | 1   |
| C(5)  | 0.06909(5)   | 0.7088(2)    | 0.33632(16) | 0.0305(4)              | 1   |
| C(6)  | 0.03460(5)   | 0.6041(2)    | 0.39020(17) | 0.0321(4)              | 1   |
| C(7)  | 0.01087(6)   | 0.7605(2)    | 0.42204(19) | 0.0352(4)              | 1   |
| C(8)  | 0.04540(5)   | 0.8651(2)    | 0.36814(17) | 0.0331(4)              | 1   |
| C(9)  | 0.12945(5)   | 0.6874(2)    | 0.51902(16) | 0.0289(4)              | 1   |
| C(10) | 0.15223(5)   | 0.4073(2)    | 0.53729(15) | 0.0253(3)              | 1   |
| C(11) | 0.16120(5)   | 0.25715(19)  | 0.45734(15) | 0.0253(4)              | 1   |
| C(12) | 0.13365(5)   | 0.1814(2)    | 0.37378(16) | 0.0291(4)              | 1   |
| C(13) | 0.14328(5)   | 0.0439(2)    | 0.30161(17) | 0.0332(4)              | 1   |
| C(14) | 0.18054(6)   | -0.0201(2)   | 0.31099(17) | 0.0334(4)              | 1   |
| C(15) | 0.20785(5)   | 0.0526(2)    | 0.39556(17) | 0.0322(4)              | 1   |
| C(16) | 0.19789(5)   | 0.1899(2)    | 0.46918(16) | 0.0299(4)              | 1   |
| C(17) | 0.25820(7)   | -0.1295(3)   | 0.3293(3)   | 0.0640(7)              | 1   |

---

**Table 4.** Hydrogen Atom Coordinates, Isotropic Thermal Parameters and Occupancies

---

| <b>Atom</b> | <b>x</b>  | <b>y</b> | <b>z</b> | <b>U<sub>eq</sub> (Å<sup>2</sup>)</b> | <b>Occ</b> |
|-------------|-----------|----------|----------|---------------------------------------|------------|
| H(1N)       | 0.1449(6) | 0.530(3) | 0.378(2) | 0.031(5)                              | 1          |
| H(2)        | 0.0553    | 0.5133   | 0.5993   | 0.039                                 | 1          |
| H(3)        | 0.0142    | 0.7854   | 0.6546   | 0.044                                 | 1          |
| H(4)        | 0.0740    | 0.9681   | 0.5616   | 0.039                                 | 1          |
| H(5)        | 0.0838    | 0.6882   | 0.2504   | 0.037                                 | 1          |
| H(6)        | 0.0240    | 0.5062   | 0.3440   | 0.039                                 | 1          |
| H(7)        | -0.0172   | 0.7778   | 0.3995   | 0.042                                 | 1          |
| H(8)        | 0.0428    | 0.9596   | 0.3057   | 0.040                                 | 1          |
| H(9A)       | 0.1449    | 0.7781   | 0.4830   | 0.035                                 | 1          |
| H(9B)       | 0.1326    | 0.6858   | 0.6194   | 0.035                                 | 1          |
| H(13)       | 0.1244    | -0.0069  | 0.2455   | 0.040                                 | 1          |
| H(14)       | 0.1873    | -0.1130  | 0.2599   | 0.040                                 | 1          |
| H(16)       | 0.2165    | 0.2379   | 0.5283   | 0.036                                 | 1          |
| H(17A)      | 0.2422    | -0.2250  | 0.3453   | 0.096                                 | 1          |
| H(17B)      | 0.2854    | -0.1542  | 0.3508   | 0.096                                 | 1          |
| H(17C)      | 0.2560    | -0.0973  | 0.2334   | 0.096                                 | 1          |

---

**Table 5.** Anisotropic Thermal Parameters ( $\text{\AA}^2$ )

| Atom  | U(1,1)     | U(2,2)     | U(3,3)     | U(1,2)      | U(1,3)       | U(2,3)       |
|-------|------------|------------|------------|-------------|--------------|--------------|
| Cl(1) | 0.0372(3)  | 0.0359(3)  | 0.0414(3)  | 0.00021(16) | -0.00785(19) | -0.00313(17) |
| O(1)  | 0.0497(8)  | 0.0363(7)  | 0.0144(5)  | 0.0034(5)   | 0.0033(5)    | 0.0004(5)    |
| O(2)  | 0.0395(8)  | 0.0488(8)  | 0.0566(9)  | 0.0091(6)   | -0.0018(6)   | -0.0234(7)   |
| N(1)  | 0.0368(8)  | 0.0288(7)  | 0.0147(6)  | -0.0006(6)  | 0.0036(5)    | -0.0001(5)   |
| C(1)  | 0.0357(9)  | 0.0296(8)  | 0.0195(7)  | -0.0004(7)  | 0.0013(6)    | 0.0001(7)    |
| C(2)  | 0.0364(9)  | 0.0355(9)  | 0.0249(8)  | -0.0006(7)  | 0.0025(7)    | 0.0040(7)    |
| C(3)  | 0.0371(10) | 0.0478(11) | 0.0244(8)  | 0.0047(8)   | 0.0060(7)    | -0.0001(8)   |
| C(4)  | 0.0419(10) | 0.0325(9)  | 0.0224(8)  | 0.0020(7)   | -0.0007(7)   | -0.0020(7)   |
| C(5)  | 0.0369(9)  | 0.0345(9)  | 0.0202(8)  | -0.0021(7)  | 0.0016(6)    | -0.0007(7)   |
| C(6)  | 0.0332(9)  | 0.0350(9)  | 0.0281(8)  | -0.0025(7)  | -0.0002(6)   | 0.0000(7)    |
| C(7)  | 0.0338(9)  | 0.0426(10) | 0.0292(9)  | 0.0032(7)   | 0.0012(7)    | 0.0014(7)    |
| C(8)  | 0.0406(10) | 0.0341(9)  | 0.0247(8)  | 0.0014(7)   | -0.0015(7)   | 0.0023(7)    |
| C(9)  | 0.0374(9)  | 0.0265(8)  | 0.0229(7)  | -0.0014(7)  | 0.0008(6)    | -0.0017(7)   |
| C(10) | 0.0283(8)  | 0.0310(8)  | 0.0167(7)  | -0.0024(6)  | 0.0042(6)    | 0.0003(6)    |
| C(11) | 0.0334(9)  | 0.0273(8)  | 0.0153(7)  | -0.0020(6)  | 0.0048(6)    | 0.0031(6)    |
| C(12) | 0.0357(9)  | 0.0296(9)  | 0.0219(7)  | -0.0018(7)  | -0.0008(6)   | 0.0030(7)    |
| C(13) | 0.0437(10) | 0.0293(9)  | 0.0266(8)  | -0.0038(7)  | -0.0040(7)   | -0.0018(7)   |
| C(14) | 0.0465(10) | 0.0292(8)  | 0.0246(8)  | -0.0004(7)  | 0.0052(7)    | -0.0039(7)   |
| C(15) | 0.0338(9)  | 0.0346(9)  | 0.0283(8)  | 0.0014(7)   | 0.0048(7)    | -0.0018(7)   |
| C(16) | 0.0338(9)  | 0.0335(9)  | 0.0225(7)  | -0.0012(7)  | 0.0022(6)    | -0.0034(7)   |
| C(17) | 0.0472(13) | 0.0620(15) | 0.0828(18) | 0.0133(11)  | 0.0002(12)   | -0.0397(14)  |

**Table 6.** Non Hydrogen Bond Lengths ( $\text{\AA}$ )

| Atom  | Atom  | Distance   | Atom  | Atom  | Distance   |
|-------|-------|------------|-------|-------|------------|
| O(1)  | N(1)  | 1.4010(13) | O(2)  | C(1)  | 1.4236(15) |
| O(21) | N(21) | 1.4049(12) | O(22) | C(21) | 1.4289(14) |
| N(1)  | C(8)  | 1.4985(15) | N(1)  | C(9)  | 1.4990(14) |
| N(1)  | C(2)  | 1.5435(13) | N(21) | C(28) | 1.4927(16) |
| N(21) | C(29) | 1.4951(16) | N(21) | C(22) | 1.5396(14) |
| C(1)  | C(7)  | 1.5276(16) | C(1)  | C(6)  | 1.5416(16) |
| C(1)  | C(2)  | 1.5552(14) | C(2)  | C(3)  | 1.5223(16) |
| C(3)  | C(4)  | 1.5451(16) | C(4)  | C(10) | 1.5187(17) |
| C(4)  | C(5)  | 1.5342(16) | C(5)  | C(6)  | 1.5224(18) |
| C(10) | C(11) | 1.3290(18) | C(10) | C(12) | 1.5041(16) |
| C(21) | C(26) | 1.5302(18) | C(21) | C(27) | 1.5333(18) |
| C(21) | C(22) | 1.5523(15) | C(22) | C(23) | 1.5284(14) |
| C(23) | C(24) | 1.5419(16) | C(24) | C(31) | 1.5213(16) |
| C(24) | C(25) | 1.5321(16) | C(25) | C(26) | 1.5278(17) |
| C(31) | C(32) | 1.325(2)   | C(31) | C(33) | 1.5053(19) |

Symmetry Operators

(1) x, y, z

(2) -x, y+1/2, -z

**Table 7.** Non Hydrogen Bond Angles ( ° )

| Atom  | Atom  | Atom  | Angle      | Atom  | Atom  | Atom  | Angle      |
|-------|-------|-------|------------|-------|-------|-------|------------|
| O(1)  | N(1)  | C(8)  | 108.27(9)  | C(5)  | C(4)  | C(3)  | 107.77(10) |
| O(1)  | N(1)  | C(9)  | 107.77(9)  | C(6)  | C(5)  | C(4)  | 111.63(9)  |
| C(8)  | N(1)  | C(9)  | 107.93(9)  | C(5)  | C(6)  | C(1)  | 115.34(10) |
| O(1)  | N(1)  | C(2)  | 110.50(8)  | C(11) | C(10) | C(12) | 120.10(12) |
| C(8)  | N(1)  | C(2)  | 113.72(9)  | C(11) | C(10) | C(4)  | 124.13(11) |
| C(9)  | N(1)  | C(2)  | 108.47(8)  | C(12) | C(10) | C(4)  | 115.61(11) |
| O(21) | N(21) | C(28) | 107.80(8)  | O(22) | C(21) | C(26) | 105.56(10) |
| O(21) | N(21) | C(29) | 108.12(9)  | O(22) | C(21) | C(27) | 109.36(10) |
| C(28) | N(21) | C(29) | 107.50(10) | C(26) | C(21) | C(27) | 110.30(11) |
| O(21) | N(21) | C(22) | 110.51(8)  | O(22) | C(21) | C(22) | 109.04(9)  |
| C(28) | N(21) | C(22) | 113.83(9)  | C(26) | C(21) | C(22) | 106.79(9)  |
| C(29) | N(21) | C(22) | 108.89(8)  | C(27) | C(21) | C(22) | 115.32(10) |
| O(2)  | C(1)  | C(7)  | 108.94(10) | C(23) | C(22) | N(21) | 111.13(9)  |
| O(2)  | C(1)  | C(6)  | 105.91(9)  | C(23) | C(22) | C(21) | 112.22(9)  |
| C(7)  | C(1)  | C(6)  | 110.75(10) | N(21) | C(22) | C(21) | 114.98(8)  |
| O(2)  | C(1)  | C(2)  | 109.28(9)  | C(22) | C(23) | C(24) | 111.04(9)  |
| C(7)  | C(1)  | C(2)  | 115.42(10) | C(31) | C(24) | C(25) | 115.03(10) |
| C(6)  | C(1)  | C(2)  | 106.09(9)  | C(31) | C(24) | C(23) | 113.67(9)  |
| C(3)  | C(2)  | N(1)  | 111.57(9)  | C(25) | C(24) | C(23) | 108.10(9)  |
| C(3)  | C(2)  | C(1)  | 112.72(8)  | C(26) | C(25) | C(24) | 111.69(9)  |
| N(1)  | C(2)  | C(1)  | 114.64(9)  | C(25) | C(26) | C(21) | 113.69(11) |
| C(2)  | C(3)  | C(4)  | 110.58(9)  | C(32) | C(31) | C(33) | 119.99(12) |
| C(10) | C(4)  | C(5)  | 115.21(10) | C(32) | C(31) | C(24) | 124.24(12) |
| C(10) | C(4)  | C(3)  | 112.73(9)  | C(33) | C(31) | C(24) | 115.69(11) |

Symmetry Operators

(1) x, y, z

(2) -x, y+1/2, -z

**Table 8.** Hydrogen Bond Geometry

| Donor | Hydrogen | Acceptor | D-H (Å) | H-A (Å) | D-A (Å)    | DHA Angle ( ° ) |
|-------|----------|----------|---------|---------|------------|-----------------|
| O(2)  | H(2)     | O(1)     | 0.85(2) | 1.78(2) | 2.5589(12) | 151.2(18)       |
| O(2)  | H(2)     | N(1)     | 0.85(2) | 2.51(2) | 3.0184(13) | 118.9(15)       |
| O(22) | H(22)    | O(21)    | 0.91(2) | 1.72(2) | 2.5675(14) | 154.3(18)       |
| O(22) | H(22)    | N(21)    | 0.91(2) | 2.45(2) | 3.0177(14) | 120.6(15)       |
| O(31) | H(31A)   | O(21)    | 0.89(2) | 1.94(2) | 2.8301(15) | 176(2)          |
| O(31) | H(31B)   | O(1)     | 0.87(2) | 1.99(2) | 2.8517(14) | 170.2(19)       |

Symmetry Operators

(1) x, y, z

(2) -x, y+1/2, -z



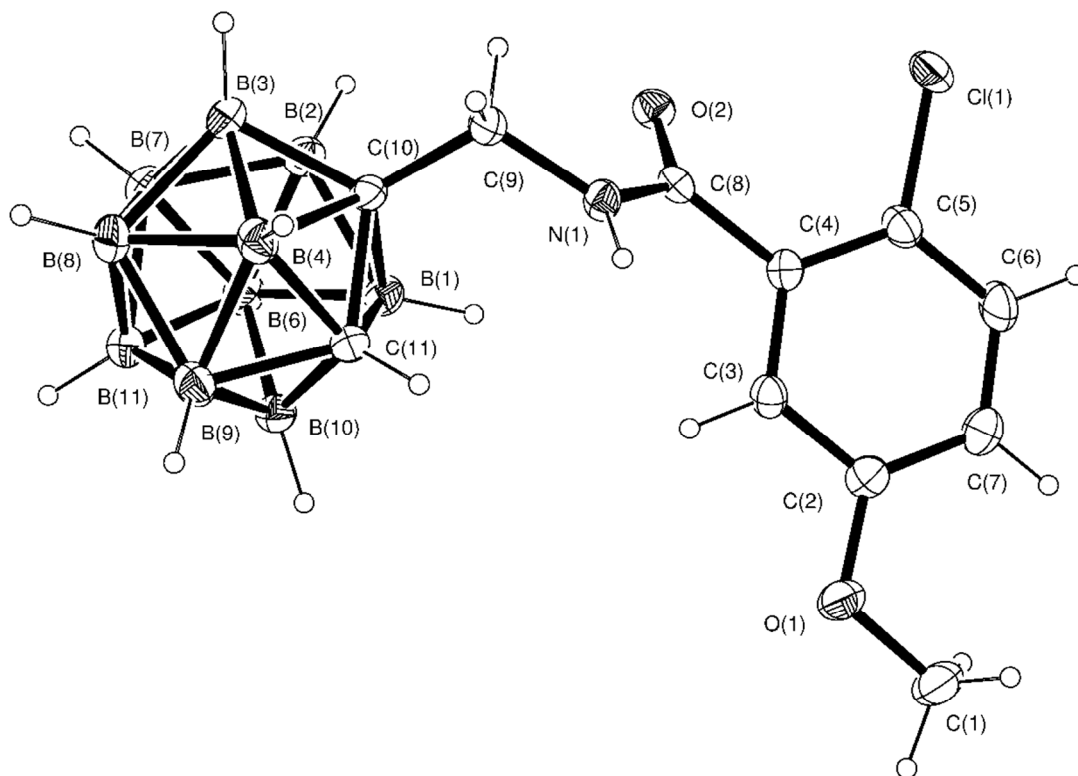

**Figure 4.** The asymmetric unit for the single crystal structure determination of *N*-(*closo*-1,2-carboranyl-methyl)-2-chloro-5-methoxybenzamide 4 (CCDC 966908). Anisotropic displacement ellipsoids are given at 50% probability levels for the non-hydrogen atoms.

#### **Experimental Details for *N*-(*closo*-1,2-carboranyl-methyl)-2-chloro-5-methoxybenzamide (4)**

A colorless plate-like crystal was attached with Exxon Paratone N, to a short length of fibre supported on a thin piece of copper wire inserted in a copper mounting pin. The crystal was quenched in a cold nitrogen gas stream from an Oxford Cryosystems Cryostream. A APEXII-FR591 diffractometer employing graphite monochromated MoK $\alpha$  radiation generated from a rotating anode was used for the data collection. Cell constants were obtained from a least squares refinement against 4031 reflections located between 4.9 and 64.5° 2 $\theta$ . Data were collected at 150(2) Kelvin with  $\omega$ + $\phi$  scans to 55.00° 2 $\theta$ . The data integration and reduction were undertaken with SAINT and XPREP,<sup>25</sup> and subsequent computations were carried out with the XP SHELXTL-Plus<sup>26</sup> and WinGX<sup>21</sup> graphical user interfaces.

The structure was solved in the space group *P*ccn(#56) by direct methods with SHELXS-97,<sup>23</sup> and extended and refined with SHELXL-97.<sup>23</sup> The non-hydrogen atoms in the asymmetric unit were modelled with anisotropic displacement parameters. Of the 20 hydrogen atoms included in the model the 11 attached to the carborane cluster were located and modelled with isotropic displacement parameters, and a riding atom model was used for the remainder. An ORTEP<sup>27</sup> depiction of the molecule with 50% displacement ellipsoids is provided in **Figure 4**.

**Table 9.** Results for *N-(closo-1,2-carboranyl-methyl)-2-chloro-5-methoxybenzamide 4*

|                                                                         |                                                                   |
|-------------------------------------------------------------------------|-------------------------------------------------------------------|
| Formula of the Refinement Model                                         | C <sub>11</sub> H <sub>20</sub> B <sub>10</sub> ClNO <sub>2</sub> |
| Model Molecular Weight                                                  | 341.83                                                            |
| Crystal System                                                          | orthorhombic                                                      |
| Space Group                                                             | <i>Pccn</i> (#56)                                                 |
| <i>a</i>                                                                | 16.5319(10) Å                                                     |
| <i>b</i>                                                                | 21.1019(12) Å                                                     |
| <i>c</i>                                                                | 10.0474(6) Å                                                      |
| <i>V</i>                                                                | 3505.1(4) Å <sup>3</sup>                                          |
| <i>D<sub>c</sub></i>                                                    | 1.296 g cm <sup>-3</sup>                                          |
| <i>Z</i>                                                                | 8                                                                 |
| Crystal Size                                                            | 0.312x0.120x0.058 mm                                              |
| Crystal Color                                                           | colorless                                                         |
| Crystal Habit                                                           | plate                                                             |
| Temperature                                                             | 150(2) Kelvin                                                     |
| $\lambda$ (CuK $\alpha$ )                                               | 0.71069 Å                                                         |
| $\mu$ (CuK $\alpha$ )                                                   | 0.221 mm <sup>-1</sup>                                            |
| $2\theta_{\max}$                                                        | 55.0°                                                             |
| hkl range                                                               | -21 21, -26 27, -13 12                                            |
| <i>N</i>                                                                | 56954                                                             |
| <i>N</i> <sub>ind</sub>                                                 | 4031( <i>R</i> <sub>merge</sub> 0.0276)                           |
| <i>N</i> <sub>obs</sub>                                                 | 3706( <i>I</i> > 2 $\sigma$ ( <i>I</i> ))                         |
| <i>N</i> <sub>var</sub>                                                 | 271                                                               |
| Residuals* <i>R</i> 1( <i>F</i> ), <i>wR</i> 2( <i>F</i> <sup>2</sup> ) | 0.0316, 0.0915                                                    |
| GoF(all)                                                                | 1.067                                                             |
| Residual Extrema                                                        | -0.249, 0.354 e <sup>-</sup> Å <sup>-3</sup>                      |

\**R*1 =  $\Sigma||F_o| - |F_c||/\Sigma|F_o|$  for  $F_o > 2\sigma(F_o)$ ; *wR*2 =  $(\Sigma w(F_o^2 - F_c^2)^2/\Sigma(wF_c^2)^2)^{1/2}$  all reflections

$w=1/[\sigma^2(F_o^2)+(0.05P)^2+0.13P]$  where  $P=(F_o^2+2F_c^2)/3$

**Table 10.** Non-Hydrogen Atom Coordinates, Isotropic Thermal Parameters and Occupancies

| Atom  | x            | y            | z           | $U_{eq}(\text{Å}^2)$ | Occ |
|-------|--------------|--------------|-------------|----------------------|-----|
| Cl(1) | 0.239946(18) | 0.668008(14) | 0.13203(3)  | 0.03245(10)          | 1   |
| C(1)  | 0.08659(8)   | 0.48517(6)   | 0.61493(13) | 0.0321(3)            | 1   |
| O(1)  | 0.07189(6)   | 0.55079(4)   | 0.58493(8)  | 0.0303(2)            | 1   |
| C(2)  | 0.11232(7)   | 0.57539(5)   | 0.47833(11) | 0.0221(2)            | 1   |
| C(3)  | 0.09210(6)   | 0.63769(5)   | 0.44387(10) | 0.0195(2)            | 1   |
| C(4)  | 0.12972(6)   | 0.66775(5)   | 0.33713(10) | 0.0174(2)            | 1   |
| C(5)  | 0.18850(6)   | 0.63419(5)   | 0.26530(11) | 0.0222(2)            | 1   |
| C(6)  | 0.20899(7)   | 0.57299(5)   | 0.30054(13) | 0.0296(3)            | 1   |
| C(7)  | 0.17099(8)   | 0.54301(5)   | 0.40659(12) | 0.0282(3)            | 1   |
| C(8)  | 0.10424(6)   | 0.73363(5)   | 0.29824(10) | 0.0166(2)            | 1   |
| O(2)  | 0.08680(4)   | 0.74730(4)   | 0.18215(7)  | 0.02072(17)          | 1   |
| N(1)  | 0.09955(5)   | 0.77588(4)   | 0.39809(9)  | 0.01808(19)          | 1   |
| C(9)  | 0.07248(6)   | 0.84047(5)   | 0.37565(11) | 0.0198(2)            | 1   |
| C(10) | -0.01736(6)  | 0.85161(5)   | 0.40851(10) | 0.0171(2)            | 1   |
| C(11) | -0.05581(6)  | 0.81808(5)   | 0.54134(10) | 0.0189(2)            | 1   |
| B(1)  | -0.08481(7)  | 0.79003(6)   | 0.38777(12) | 0.0200(2)            | 1   |
| B(2)  | -0.08953(8)  | 0.85897(6)   | 0.28739(12) | 0.0218(2)            | 1   |
| B(3)  | -0.05851(8)  | 0.92498(6)   | 0.38608(13) | 0.0231(3)            | 1   |
| B(4)  | -0.03526(8)  | 0.89746(6)   | 0.54929(12) | 0.0221(2)            | 1   |
| B(6)  | -0.17918(8)  | 0.82682(6)   | 0.35869(13) | 0.0231(3)            | 1   |
| B(7)  | -0.16336(8)  | 0.91036(6)   | 0.35765(13) | 0.0247(3)            | 1   |
| B(8)  | -0.12930(8)  | 0.93429(6)   | 0.51910(14) | 0.0255(3)            | 1   |
| B(9)  | -0.12450(8)  | 0.86516(6)   | 0.61999(12) | 0.0238(3)            | 1   |
| B(10) | -0.15459(7)  | 0.79890(6)   | 0.52139(13) | 0.0221(2)            | 1   |
| B(11) | -0.20400(8)  | 0.87324(6)   | 0.50207(13) | 0.0238(3)            | 1   |

**Table 11.** Hydrogen Atom Coordinates, Isotropic Thermal Parameters and Occupancies

---

| Atom   | x          | y         | z          | $U_{eq}(\text{\AA}^2)$ | Occ |
|--------|------------|-----------|------------|------------------------|-----|
| H(1A)  | 0.0751     | 0.4593    | 0.5361     | 0.048                  | 1   |
| H(1B)  | 0.0514     | 0.4719    | 0.6883     | 0.048                  | 1   |
| H(1C)  | 0.1433     | 0.4796    | 0.6408     | 0.048                  | 1   |
| H(3A)  | 0.0523     | 0.6597    | 0.4939     | 0.023                  | 1   |
| H(6A)  | 0.2495     | 0.5511    | 0.2517     | 0.035                  | 1   |
| H(7A)  | 0.1850     | 0.5008    | 0.4298     | 0.034                  | 1   |
| H(1D)  | 0.1132     | 0.7641    | 0.4790     | 0.022                  | 1   |
| H(9A)  | 0.0819     | 0.8515    | 0.2811     | 0.024                  | 1   |
| H(9B)  | 0.1057     | 0.8694    | 0.4307     | 0.024                  | 1   |
| H(11A) | -0.0188(9) | 0.7912(7) | 0.5896(15) | 0.031(4)               | 1   |
| H(1)   | -0.0611(9) | 0.7445(6) | 0.3586(14) | 0.027(4)               | 1   |
| H(2)   | -0.0698(9) | 0.8569(7) | 0.1836(15) | 0.032(4)               | 1   |
| H(3)   | -0.0201(9) | 0.9611(7) | 0.3461(15) | 0.032(4)               | 1   |
| H(4)   | 0.0174(9)  | 0.9119(7) | 0.6068(13) | 0.028(4)               | 1   |
| H(6)   | -0.2246(8) | 0.8039(7) | 0.2980(14) | 0.030(4)               | 1   |
| H(7)   | -0.1999(9) | 0.9415(7) | 0.2942(15) | 0.035(4)               | 1   |
| H(8)   | -0.1407(9) | 0.9815(7) | 0.5593(15) | 0.035(4)               | 1   |
| H(9)   | -0.1269(9) | 0.8618(7) | 0.7270(15) | 0.036(4)               | 1   |
| H(10)  | -0.1745(9) | 0.7567(7) | 0.5686(15) | 0.029(4)               | 1   |
| H(11)  | -0.2658(8) | 0.8807(6) | 0.5329(14) | 0.027(3)               | 1   |

---

**Table 12.** Anisotropic Thermal Parameters ( $\text{\AA}^2$ )

---

| Atom  | U(1,1)      | U(2,2)      | U(3,3)      | U(1,2)      | U(1,3)      | U(2,3)      |
|-------|-------------|-------------|-------------|-------------|-------------|-------------|
| Cl(1) | 0.02985(17) | 0.02660(16) | 0.04091(19) | 0.00225(11) | 0.01958(12) | 0.00123(11) |
| C(1)  | 0.0432(7)   | 0.0226(6)   | 0.0304(6)   | 0.0032(5)   | 0.0016(5)   | 0.0069(5)   |
| O(1)  | 0.0433(5)   | 0.0232(4)   | 0.0245(4)   | 0.0066(4)   | 0.0076(4)   | 0.0055(3)   |
| C(2)  | 0.0264(5)   | 0.0210(5)   | 0.0188(5)   | 0.0003(4)   | -0.0014(4)  | -0.0010(4)  |
| C(3)  | 0.0208(5)   | 0.0207(5)   | 0.0170(5)   | 0.0035(4)   | -0.0002(4)  | -0.0034(4)  |
| C(4)  | 0.0174(5)   | 0.0175(5)   | 0.0173(5)   | 0.0008(4)   | -0.0019(4)  | -0.0040(4)  |
| C(5)  | 0.0208(5)   | 0.0205(5)   | 0.0251(5)   | -0.0010(4)  | 0.0056(4)   | -0.0036(4)  |
| C(6)  | 0.0288(6)   | 0.0212(5)   | 0.0387(7)   | 0.0055(4)   | 0.0105(5)   | -0.0053(5)  |
| C(7)  | 0.0329(6)   | 0.0173(5)   | 0.0343(6)   | 0.0045(4)   | 0.0034(5)   | -0.0013(4)  |
| C(8)  | 0.0134(4)   | 0.0196(5)   | 0.0167(5)   | -0.0008(4)  | 0.0018(3)   | -0.0015(4)  |
| O(2)  | 0.0227(4)   | 0.0245(4)   | 0.0150(3)   | 0.0001(3)   | 0.0001(3)   | -0.0003(3)  |
| N(1)  | 0.0211(4)   | 0.0179(4)   | 0.0153(4)   | 0.0028(3)   | 0.0000(3)   | -0.0015(3)  |
| C(9)  | 0.0205(5)   | 0.0159(5)   | 0.0230(5)   | 0.0001(4)   | 0.0042(4)   | -0.0009(4)  |
| C(10) | 0.0211(5)   | 0.0138(4)   | 0.0165(5)   | -0.0003(4)  | 0.0020(4)   | 0.0000(4)   |
| C(11) | 0.0202(5)   | 0.0191(5)   | 0.0176(5)   | 0.0014(4)   | 0.0006(4)   | 0.0025(4)   |
| B(1)  | 0.0218(5)   | 0.0159(5)   | 0.0223(6)   | -0.0015(4)  | -0.0002(4)  | -0.0017(4)  |
| B(2)  | 0.0252(6)   | 0.0221(6)   | 0.0182(5)   | 0.0013(5)   | -0.0009(4)  | 0.0020(4)   |
| B(3)  | 0.0275(6)   | 0.0145(5)   | 0.0274(6)   | 0.0020(5)   | 0.0039(5)   | 0.0021(4)   |
| B(4)  | 0.0244(6)   | 0.0195(5)   | 0.0224(6)   | 0.0001(4)   | 0.0025(5)   | -0.0059(5)  |
| B(6)  | 0.0210(6)   | 0.0230(6)   | 0.0254(6)   | 0.0006(5)   | -0.0025(5)  | 0.0005(5)   |
| B(7)  | 0.0255(6)   | 0.0217(6)   | 0.0268(6)   | 0.0055(5)   | 0.0003(5)   | 0.0060(5)   |
| B(8)  | 0.0275(6)   | 0.0192(6)   | 0.0298(6)   | 0.0047(5)   | 0.0049(5)   | -0.0034(5)  |
| B(9)  | 0.0243(6)   | 0.0266(6)   | 0.0204(6)   | 0.0037(5)   | 0.0040(5)   | -0.0011(5)  |
| B(10) | 0.0194(5)   | 0.0212(6)   | 0.0259(6)   | 0.0004(4)   | 0.0022(5)   | 0.0047(5)   |
| B(11) | 0.0214(6)   | 0.0240(6)   | 0.0261(6)   | 0.0043(5)   | 0.0022(5)   | 0.0030(5)   |

---

**Table 13.** Non Hydrogen Bond Lengths (Å)

| Atom  | Atom  | Distance   | Atom  | Atom  | Distance   |
|-------|-------|------------|-------|-------|------------|
| Cl(1) | C(5)  | 1.7394(11) | C(1)  | O(1)  | 1.4377(14) |
| O(1)  | C(2)  | 1.3650(14) | C(2)  | C(7)  | 1.3882(16) |
| C(2)  | C(3)  | 1.4000(15) | C(3)  | C(4)  | 1.3926(15) |
| C(4)  | C(5)  | 1.4023(14) | C(4)  | C(8)  | 1.5044(14) |
| C(5)  | C(6)  | 1.3813(16) | C(6)  | C(7)  | 1.3894(17) |
| C(8)  | O(2)  | 1.2357(12) | C(8)  | N(1)  | 1.3443(13) |
| N(1)  | C(9)  | 1.4522(13) | C(9)  | C(10) | 1.5394(14) |
| C(10) | C(11) | 1.6389(14) | C(10) | B(3)  | 1.7059(15) |
| C(10) | B(2)  | 1.7113(16) | C(10) | B(1)  | 1.7251(16) |
| C(10) | B(4)  | 1.7391(15) | C(11) | B(10) | 1.6943(16) |
| C(11) | B(9)  | 1.7031(16) | C(11) | B(4)  | 1.7110(16) |
| C(11) | B(1)  | 1.7208(16) | B(1)  | B(6)  | 1.7669(18) |
| B(1)  | B(2)  | 1.7719(17) | B(1)  | B(10) | 1.7799(17) |
| B(2)  | B(7)  | 1.7788(18) | B(2)  | B(6)  | 1.7804(18) |
| B(2)  | B(3)  | 1.7850(18) | B(3)  | B(4)  | 1.7816(18) |
| B(3)  | B(7)  | 1.7837(19) | B(3)  | B(8)  | 1.7874(18) |
| B(4)  | B(8)  | 1.7643(18) | B(4)  | B(9)  | 1.7736(18) |
| B(6)  | B(7)  | 1.7822(18) | B(6)  | B(10) | 1.7845(18) |
| B(6)  | B(11) | 1.7898(18) | B(7)  | B(11) | 1.7805(18) |
| B(7)  | B(8)  | 1.7899(19) | B(8)  | B(9)  | 1.7782(19) |
| B(8)  | B(11) | 1.7928(19) | B(9)  | B(11) | 1.7777(19) |
| B(9)  | B(10) | 1.7842(18) | B(10) | B(11) | 1.7792(17) |

Symmetry Operators

|                |                       |                       |                       |
|----------------|-----------------------|-----------------------|-----------------------|
| (1) x, y, z    | (2) -x+1/2, -y+1/2, z | (3) -x, y+1/2, -z+1/2 | (4) x+1/2, -y, -z+1/2 |
| (5) -x, -y, -z | (6) x-1/2, y-1/2, -z  | (7) x, -y-1/2, z-1/2  | (8) -x-1/2, y, z-1/2  |

**Table 14.** Non Hydrogen Bond Angles (°)

| Atom | Atom  | Atom  | Angle      | Atom  | Atom | Atom  | Angle     |
|------|-------|-------|------------|-------|------|-------|-----------|
| C(2) | O(1)  | C(1)  | 116.62(9)  | B(2)  | B(3) | B(8)  | 108.25(9) |
| O(1) | C(2)  | C(7)  | 124.22(10) | C(11) | B(4) | C(10) | 56.71(6)  |
| O(1) | C(2)  | C(3)  | 115.74(10) | C(11) | B(4) | B(8)  | 104.37(9) |
| C(7) | C(2)  | C(3)  | 120.04(10) | C(10) | B(4) | B(8)  | 104.79(9) |
| C(4) | C(3)  | C(2)  | 120.77(10) | C(11) | B(4) | B(9)  | 58.48(7)  |
| C(3) | C(4)  | C(5)  | 118.41(9)  | C(10) | B(4) | B(9)  | 104.68(8) |
| C(3) | C(4)  | C(8)  | 119.73(9)  | B(8)  | B(4) | B(9)  | 60.35(7)  |
| C(5) | C(4)  | C(8)  | 121.80(9)  | C(11) | B(4) | B(3)  | 103.49(8) |
| C(6) | C(5)  | C(4)  | 120.67(10) | C(10) | B(4) | B(3)  | 57.95(6)  |
| C(6) | C(5)  | Cl(1) | 117.45(8)  | B(8)  | B(4) | B(3)  | 60.54(7)  |
| C(4) | C(5)  | Cl(1) | 121.86(8)  | B(9)  | B(4) | B(3)  | 108.33(9) |
| C(5) | C(6)  | C(7)  | 120.75(10) | B(1)  | B(6) | B(2)  | 59.93(7)  |
| C(2) | C(7)  | C(6)  | 119.35(10) | B(1)  | B(6) | B(7)  | 107.82(9) |
| O(2) | C(8)  | N(1)  | 122.43(10) | B(2)  | B(6) | B(7)  | 59.91(7)  |
| O(2) | C(8)  | C(4)  | 121.75(9)  | B(1)  | B(6) | B(10) | 60.16(7)  |
| N(1) | C(8)  | C(4)  | 115.79(9)  | B(2)  | B(6) | B(10) | 107.74(9) |
| C(8) | N(1)  | C(9)  | 121.62(9)  | B(7)  | B(6) | B(10) | 107.36(9) |
| N(1) | C(9)  | C(10) | 114.04(8)  | B(1)  | B(6) | B(11) | 108.05(9) |
| C(9) | C(10) | C(11) | 118.87(8)  | B(2)  | B(6) | B(11) | 107.82(9) |
| C(9) | C(10) | B(3)  | 119.67(8)  | B(7)  | B(6) | B(11) | 59.80(7)  |

|       |       |       |           |       |       |       |           |
|-------|-------|-------|-----------|-------|-------|-------|-----------|
| C(11) | C(10) | B(3)  | 110.16(8) | B(10) | B(6)  | B(11) | 59.71(7)  |
| C(9)  | C(10) | B(2)  | 122.27(9) | B(2)  | B(7)  | B(11) | 108.31(9) |
| C(11) | C(10) | B(2)  | 110.35(8) | B(2)  | B(7)  | B(6)  | 60.00(7)  |
| B(3)  | C(10) | B(2)  | 62.98(7)  | B(11) | B(7)  | B(6)  | 60.32(7)  |
| C(9)  | C(10) | B(1)  | 118.86(8) | B(2)  | B(7)  | B(3)  | 60.14(7)  |
| C(11) | C(10) | B(1)  | 61.47(6)  | B(11) | B(7)  | B(3)  | 108.19(9) |
| B(3)  | C(10) | B(1)  | 114.20(8) | B(6)  | B(7)  | B(3)  | 108.22(9) |
| B(2)  | C(10) | B(1)  | 62.08(7)  | B(2)  | B(7)  | B(8)  | 108.41(9) |
| C(9)  | C(10) | B(4)  | 115.06(8) | B(11) | B(7)  | B(8)  | 60.28(7)  |
| C(11) | C(10) | B(4)  | 60.78(6)  | B(6)  | B(7)  | B(8)  | 108.66(9) |
| B(3)  | C(10) | B(4)  | 62.27(7)  | B(3)  | B(7)  | B(8)  | 60.02(7)  |
| B(2)  | C(10) | B(4)  | 114.16(8) | B(4)  | B(8)  | B(9)  | 60.09(7)  |
| B(1)  | C(10) | B(4)  | 114.04(8) | B(4)  | B(8)  | B(3)  | 60.21(7)  |
| C(10) | C(11) | B(10) | 112.37(8) | B(9)  | B(8)  | B(3)  | 107.87(8) |
| C(10) | C(11) | B(9)  | 112.62(8) | B(4)  | B(8)  | B(7)  | 107.98(9) |
| B(10) | C(11) | B(9)  | 63.36(7)  | B(9)  | B(8)  | B(7)  | 107.41(9) |
| C(10) | C(11) | B(4)  | 62.51(6)  | B(3)  | B(8)  | B(7)  | 59.82(7)  |
| B(10) | C(11) | B(4)  | 115.52(8) | B(4)  | B(8)  | B(11) | 107.87(9) |
| B(9)  | C(11) | B(4)  | 62.60(7)  | B(9)  | B(8)  | B(11) | 59.71(7)  |
| C(10) | C(11) | B(1)  | 61.73(6)  | B(3)  | B(8)  | B(11) | 107.49(9) |
| B(10) | C(11) | B(1)  | 62.82(7)  | B(7)  | B(8)  | B(11) | 59.60(7)  |
| B(9)  | C(11) | B(1)  | 115.53(9) | C(11) | B(9)  | B(4)  | 58.92(7)  |
| B(4)  | C(11) | B(1)  | 115.72(8) | C(11) | B(9)  | B(11) | 103.87(9) |
| C(11) | B(1)  | C(10) | 56.80(6)  | B(4)  | B(9)  | B(11) | 108.13(9) |
| C(11) | B(1)  | B(6)  | 104.07(8) | C(11) | B(9)  | B(8)  | 104.11(8) |
| C(10) | B(1)  | B(6)  | 105.05(8) | B(4)  | B(9)  | B(8)  | 59.57(7)  |
| C(11) | B(1)  | B(2)  | 103.89(8) | B(11) | B(9)  | B(8)  | 60.55(7)  |
| C(10) | B(1)  | B(2)  | 58.58(6)  | C(11) | B(9)  | B(10) | 58.08(7)  |
| B(6)  | B(1)  | B(2)  | 60.41(7)  | B(4)  | B(9)  | B(10) | 108.10(8) |
| C(11) | B(1)  | B(10) | 57.86(7)  | B(11) | B(9)  | B(10) | 59.93(7)  |
| C(10) | B(1)  | B(10) | 104.39(8) | B(8)  | B(9)  | B(10) | 108.29(9) |
| B(6)  | B(1)  | B(10) | 60.41(7)  | C(11) | B(10) | B(11) | 104.17(8) |
| B(2)  | B(1)  | B(10) | 108.32(8) | C(11) | B(10) | B(1)  | 59.32(6)  |
| C(10) | B(2)  | B(1)  | 59.35(6)  | B(11) | B(10) | B(1)  | 107.94(9) |
| C(10) | B(2)  | B(7)  | 104.57(8) | C(11) | B(10) | B(9)  | 58.56(7)  |
| B(1)  | B(2)  | B(7)  | 107.75(9) | B(11) | B(10) | B(9)  | 59.85(7)  |
| C(10) | B(2)  | B(6)  | 105.05(8) | B(1)  | B(10) | B(9)  | 108.70(8) |
| B(1)  | B(2)  | B(6)  | 59.65(7)  | C(11) | B(10) | B(6)  | 104.42(8) |
| B(7)  | B(2)  | B(6)  | 60.09(7)  | B(11) | B(10) | B(6)  | 60.30(7)  |
| C(10) | B(2)  | B(3)  | 58.36(7)  | B(1)  | B(10) | B(6)  | 59.43(7)  |
| B(1)  | B(2)  | B(3)  | 108.17(9) | B(9)  | B(10) | B(6)  | 108.27(9) |
| B(7)  | B(2)  | B(3)  | 60.07(7)  | B(9)  | B(11) | B(10) | 60.22(7)  |
| B(6)  | B(2)  | B(3)  | 108.24(9) | B(9)  | B(11) | B(7)  | 107.85(9) |
| C(10) | B(3)  | B(4)  | 59.78(6)  | B(10) | B(11) | B(7)  | 107.67(9) |
| C(10) | B(3)  | B(7)  | 104.58(8) | B(9)  | B(11) | B(6)  | 108.33(9) |
| B(4)  | B(3)  | B(7)  | 107.50(9) | B(10) | B(11) | B(6)  | 60.00(7)  |
| C(10) | B(3)  | B(2)  | 58.66(6)  | B(7)  | B(11) | B(6)  | 59.89(7)  |
| B(4)  | B(3)  | B(2)  | 108.60(8) | B(9)  | B(11) | B(8)  | 59.74(7)  |
| B(7)  | B(3)  | B(2)  | 59.80(7)  | B(10) | B(11) | B(8)  | 107.87(9) |
| C(10) | B(3)  | B(8)  | 105.20(8) | B(7)  | B(11) | B(8)  | 60.12(7)  |
| B(4)  | B(3)  | B(8)  | 59.25(7)  | B(6)  | B(11) | B(8)  | 108.19(9) |
| B(7)  | B(3)  | B(8)  | 60.16(8)  |       |       |       |           |

Symmetry Operators

- |                       |                       |                       |
|-----------------------|-----------------------|-----------------------|
| (1) x, y, z           | (2) -x+1/2, -y+1/2, z | (3) -x, y+1/2, -z+1/2 |
| (4) x+1/2, -y, -z+1/2 | (5) -x, -y, -z        | (6) x-1/2, y-1/2, -z  |
| (7) x, -y-1/2, z-1/2  | (8) -x-1/2, y, z-1/2  |                       |
-

**Table 15.** Torsion Angles ( ° )

| Atom  | Atom  | Atom  | Atom  | Angle       | Atom  | Atom | Atom | Atom  | Angle       |
|-------|-------|-------|-------|-------------|-------|------|------|-------|-------------|
| C(1)  | O(1)  | C(2)  | C(7)  | -6.08(17)   | B(10) | B(6) | B(7) | B(11) | -37.48(8)   |
| C(1)  | O(1)  | C(2)  | C(3)  | 174.80(10)  | B(1)  | B(6) | B(7) | B(3)  | 0.08(12)    |
| O(1)  | C(2)  | C(3)  | C(4)  | 179.74(10)  | B(2)  | B(6) | B(7) | B(3)  | -37.31(8)   |
| C(7)  | C(2)  | C(3)  | C(4)  | 0.58(16)    | B(10) | B(6) | B(7) | B(3)  | 63.52(11)   |
| C(2)  | C(3)  | C(4)  | C(5)  | -0.20(15)   | B(11) | B(6) | B(7) | B(3)  | 101.00(10)  |
| C(2)  | C(3)  | C(4)  | C(8)  | 177.22(9)   | B(1)  | B(6) | B(7) | B(8)  | -63.56(11)  |
| C(3)  | C(4)  | C(5)  | C(6)  | -0.57(16)   | B(2)  | B(6) | B(7) | B(8)  | -100.94(10) |
| C(8)  | C(4)  | C(5)  | C(6)  | -177.94(10) | B(10) | B(6) | B(7) | B(8)  | -0.12(12)   |
| C(3)  | C(4)  | C(5)  | Cl(1) | -179.01(8)  | B(11) | B(6) | B(7) | B(8)  | 37.36(8)    |
| C(8)  | C(4)  | C(5)  | Cl(1) | 3.62(15)    | C(10) | B(3) | B(7) | B(2)  | -39.34(8)   |
| C(4)  | C(5)  | C(6)  | C(7)  | 0.98(18)    | B(4)  | B(3) | B(7) | B(2)  | -101.74(9)  |
| Cl(1) | C(5)  | C(6)  | C(7)  | 179.48(10)  | B(8)  | B(3) | B(7) | B(2)  | -138.72(9)  |
| O(1)  | C(2)  | C(7)  | C(6)  | -179.27(11) | C(10) | B(3) | B(7) | B(11) | 61.76(11)   |
| C(3)  | C(2)  | C(7)  | C(6)  | -0.18(18)   | B(4)  | B(3) | B(7) | B(11) | -0.64(11)   |
| C(5)  | C(6)  | C(7)  | C(2)  | -0.59(19)   | B(2)  | B(3) | B(7) | B(11) | 101.10(9)   |
| C(3)  | C(4)  | C(8)  | O(2)  | -129.35(11) | B(8)  | B(3) | B(7) | B(11) | -37.62(8)   |
| C(5)  | C(4)  | C(8)  | O(2)  | 47.99(15)   | C(10) | B(3) | B(7) | B(6)  | -2.10(11)   |
| C(3)  | C(4)  | C(8)  | N(1)  | 48.87(13)   | B(4)  | B(3) | B(7) | B(6)  | -64.49(11)  |
| C(5)  | C(4)  | C(8)  | N(1)  | -133.79(10) | B(2)  | B(3) | B(7) | B(6)  | 37.25(8)    |
| O(2)  | C(8)  | N(1)  | C(9)  | 0.81(15)    | B(8)  | B(3) | B(7) | B(6)  | -101.48(10) |
| C(4)  | C(8)  | N(1)  | C(9)  | -177.39(9)  | C(10) | B(3) | B(7) | B(8)  | 99.38(9)    |
| C(8)  | N(1)  | C(9)  | C(10) | 97.64(11)   | B(4)  | B(3) | B(7) | B(8)  | 36.98(8)    |
| N(1)  | C(9)  | C(10) | C(11) | 40.42(12)   | B(2)  | B(3) | B(7) | B(8)  | 138.72(9)   |
| N(1)  | C(9)  | C(10) | B(3)  | -179.48(9)  | C(11) | B(4) | B(8) | B(9)  | 39.93(8)    |
| N(1)  | C(9)  | C(10) | B(2)  | -104.46(11) | C(10) | B(4) | B(8) | B(9)  | 98.71(9)    |
| N(1)  | C(9)  | C(10) | B(1)  | -30.98(13)  | B(3)  | B(4) | B(8) | B(9)  | 137.50(9)   |
| N(1)  | C(9)  | C(10) | B(4)  | 109.47(10)  | C(11) | B(4) | B(8) | B(3)  | -97.57(9)   |
| C(9)  | C(10) | C(11) | B(10) | -147.65(9)  | C(10) | B(4) | B(8) | B(3)  | -38.79(8)   |
| B(3)  | C(10) | C(11) | B(10) | 68.76(11)   | B(9)  | B(4) | B(8) | B(3)  | -137.50(9)  |
| B(2)  | C(10) | C(11) | B(10) | 1.10(11)    | C(11) | B(4) | B(8) | B(7)  | -60.22(11)  |
| B(1)  | C(10) | C(11) | B(10) | -38.54(8)   | C(10) | B(4) | B(8) | B(7)  | -1.43(11)   |
| B(4)  | C(10) | C(11) | B(10) | 108.11(9)   | B(9)  | B(4) | B(8) | B(7)  | -100.14(10) |
| C(9)  | C(10) | C(11) | B(9)  | 143.06(9)   | B(3)  | B(4) | B(8) | B(7)  | 37.35(8)    |
| B(3)  | C(10) | C(11) | B(9)  | -0.52(12)   | C(11) | B(4) | B(8) | B(11) | 2.76(11)    |
| B(2)  | C(10) | C(11) | B(9)  | -68.19(11)  | C(10) | B(4) | B(8) | B(11) | 61.54(10)   |
| B(1)  | C(10) | C(11) | B(9)  | -107.82(10) | B(9)  | B(4) | B(8) | B(11) | -37.17(8)   |
| B(4)  | C(10) | C(11) | B(9)  | 38.83(9)    | B(3)  | B(4) | B(8) | B(11) | 100.33(9)   |
| C(9)  | C(10) | C(11) | B(4)  | 104.23(10)  | C(10) | B(3) | B(8) | B(4)  | 39.78(8)    |
| B(3)  | C(10) | C(11) | B(4)  | -39.35(8)   | B(7)  | B(3) | B(8) | B(4)  | 138.12(9)   |
| B(2)  | C(10) | C(11) | B(4)  | -107.02(9)  | B(2)  | B(3) | B(8) | B(4)  | 101.23(9)   |
| B(1)  | C(10) | C(11) | B(4)  | -146.65(9)  | C(10) | B(3) | B(8) | B(9)  | 1.81(12)    |
| C(9)  | C(10) | C(11) | B(1)  | -109.12(10) | B(4)  | B(3) | B(8) | B(9)  | -37.97(9)   |
| B(3)  | C(10) | C(11) | B(1)  | 107.30(9)   | B(7)  | B(3) | B(8) | B(9)  | 100.14(10)  |
| B(2)  | C(10) | C(11) | B(1)  | 39.63(8)    | B(2)  | B(3) | B(8) | B(9)  | 63.25(11)   |
| B(4)  | C(10) | C(11) | B(1)  | 146.65(9)   | C(10) | B(3) | B(8) | B(7)  | -98.34(9)   |
| B(10) | C(11) | B(1)  | C(10) | 139.64(8)   | B(4)  | B(3) | B(8) | B(7)  | -138.12(9)  |
| B(9)  | C(11) | B(1)  | C(10) | 103.13(9)   | B(2)  | B(3) | B(8) | B(7)  | -36.89(8)   |
| B(4)  | C(11) | B(1)  | C(10) | 32.77(8)    | C(10) | B(3) | B(8) | B(11) | -61.19(11)  |
| C(10) | C(11) | B(1)  | B(6)  | -98.97(9)   | B(4)  | B(3) | B(8) | B(11) | -100.97(9)  |
| B(10) | C(11) | B(1)  | B(6)  | 40.66(8)    | B(7)  | B(3) | B(8) | B(11) | 37.15(8)    |
| B(9)  | C(11) | B(1)  | B(6)  | 4.16(12)    | B(2)  | B(3) | B(8) | B(11) | 0.26(12)    |
| B(4)  | C(11) | B(1)  | B(6)  | -66.20(11)  | B(2)  | B(7) | B(8) | B(4)  | -0.45(12)   |
| C(10) | C(11) | B(1)  | B(2)  | -36.51(7)   | B(11) | B(7) | B(8) | B(4)  | 100.58(9)   |
| B(10) | C(11) | B(1)  | B(2)  | 103.12(9)   | B(6)  | B(7) | B(8) | B(4)  | 63.20(11)   |
| B(9)  | C(11) | B(1)  | B(2)  | 66.62(11)   | B(3)  | B(7) | B(8) | B(4)  | -37.53(8)   |
| B(4)  | C(11) | B(1)  | B(2)  | -3.74(11)   | B(2)  | B(7) | B(8) | B(9)  | -63.85(11)  |



|       |       |      |       |             |       |       |       |       |             |
|-------|-------|------|-------|-------------|-------|-------|-------|-------|-------------|
| C(10) | C(11) | B(1) | B(10) | -139.64(8)  | B(11) | B(7)  | B(8)  | B(9)  | 37.17(8)    |
| B(9)  | C(11) | B(1) | B(10) | -36.50(9)   | B(6)  | B(7)  | B(8)  | B(9)  | -0.20(12)   |
| B(4)  | C(11) | B(1) | B(10) | -106.86(10) | B(3)  | B(7)  | B(8)  | B(9)  | -100.93(9)  |
| C(9)  | C(10) | B(1) | C(11) | 109.15(10)  | B(2)  | B(7)  | B(8)  | B(3)  | 37.08(8)    |
| B(3)  | C(10) | B(1) | C(11) | -100.71(9)  | B(11) | B(7)  | B(8)  | B(3)  | 138.11(9)   |
| B(2)  | C(10) | B(1) | C(11) | -137.40(8)  | B(6)  | B(7)  | B(8)  | B(3)  | 100.73(9)   |
| B(4)  | C(10) | B(1) | C(11) | -31.69(8)   | B(2)  | B(7)  | B(8)  | B(11) | -101.03(9)  |
| C(9)  | C(10) | B(1) | B(6)  | -153.68(9)  | B(6)  | B(7)  | B(8)  | B(11) | -37.38(8)   |
| C(11) | C(10) | B(1) | B(6)  | 97.17(9)    | B(3)  | B(7)  | B(8)  | B(11) | -138.11(9)  |
| B(3)  | C(10) | B(1) | B(6)  | -3.54(11)   | C(10) | C(11) | B(9)  | B(4)  | -38.79(8)   |
| B(2)  | C(10) | B(1) | B(6)  | -40.23(8)   | B(10) | C(11) | B(9)  | B(4)  | -143.41(9)  |
| B(4)  | C(10) | B(1) | B(6)  | 65.48(11)   | B(1)  | C(11) | B(9)  | B(4)  | -107.11(9)  |
| C(9)  | C(10) | B(1) | B(2)  | -113.45(10) | C(10) | C(11) | B(9)  | B(11) | 64.23(11)   |
| C(11) | C(10) | B(1) | B(2)  | 137.40(8)   | B(10) | C(11) | B(9)  | B(11) | -40.38(8)   |
| B(3)  | C(10) | B(1) | B(2)  | 36.69(9)    | B(4)  | C(11) | B(9)  | B(11) | 103.03(9)   |
| B(4)  | C(10) | B(1) | B(2)  | 105.71(9)   | B(1)  | C(11) | B(9)  | B(11) | -4.08(12)   |
| C(9)  | C(10) | B(1) | B(10) | 143.63(9)   | C(10) | C(11) | B(9)  | B(8)  | 1.62(12)    |
| C(11) | C(10) | B(1) | B(10) | 34.48(7)    | B(10) | C(11) | B(9)  | B(8)  | -102.99(9)  |
| B(3)  | C(10) | B(1) | B(10) | -66.23(10)  | B(4)  | C(11) | B(9)  | B(8)  | 40.42(8)    |
| B(2)  | C(10) | B(1) | B(10) | -102.92(9)  | B(1)  | C(11) | B(9)  | B(8)  | -66.69(11)  |
| B(4)  | C(10) | B(1) | B(10) | 2.79(11)    | C(10) | C(11) | B(9)  | B(10) | 104.61(9)   |
| C(9)  | C(10) | B(2) | B(1)  | 108.14(10)  | B(4)  | C(11) | B(9)  | B(10) | 143.41(9)   |
| C(11) | C(10) | B(2) | B(1)  | -39.36(8)   | B(1)  | C(11) | B(9)  | B(10) | 36.30(9)    |
| B(3)  | C(10) | B(2) | B(1)  | -142.28(9)  | C(10) | B(4)  | B(9)  | C(11) | 34.29(7)    |
| B(4)  | C(10) | B(2) | B(1)  | -105.52(9)  | B(8)  | B(4)  | B(9)  | C(11) | 133.17(9)   |
| C(9)  | C(10) | B(2) | B(7)  | -149.62(9)  | B(3)  | B(4)  | B(9)  | C(11) | 94.88(9)    |
| C(11) | C(10) | B(2) | B(7)  | 62.88(10)   | C(11) | B(4)  | B(9)  | B(11) | -95.57(9)   |
| B(3)  | C(10) | B(2) | B(7)  | -40.03(8)   | C(10) | B(4)  | B(9)  | B(11) | -61.28(11)  |
| B(1)  | C(10) | B(2) | B(7)  | 102.25(9)   | B(8)  | B(4)  | B(9)  | B(11) | 37.60(8)    |
| B(4)  | C(10) | B(2) | B(7)  | -3.27(11)   | B(3)  | B(4)  | B(9)  | B(11) | -0.69(11)   |
| C(9)  | C(10) | B(2) | B(6)  | 148.00(9)   | C(11) | B(4)  | B(9)  | B(8)  | -133.17(9)  |
| C(11) | C(10) | B(2) | B(6)  | 0.50(11)    | C(10) | B(4)  | B(9)  | B(8)  | -98.88(9)   |
| B(3)  | C(10) | B(2) | B(6)  | -102.42(9)  | B(3)  | B(4)  | B(9)  | B(8)  | -38.29(8)   |
| B(1)  | C(10) | B(2) | B(6)  | 39.86(8)    | C(11) | B(4)  | B(9)  | B(10) | -32.16(8)   |
| B(4)  | C(10) | B(2) | B(6)  | -65.65(10)  | C(10) | B(4)  | B(9)  | B(10) | 2.13(11)    |
| C(9)  | C(10) | B(2) | B(3)  | -109.58(10) | B(8)  | B(4)  | B(9)  | B(10) | 101.01(10)  |
| C(11) | C(10) | B(2) | B(3)  | 102.92(9)   | B(3)  | B(4)  | B(9)  | B(10) | 62.72(11)   |
| B(1)  | C(10) | B(2) | B(3)  | 142.28(9)   | B(4)  | B(8)  | B(9)  | C(11) | -40.09(8)   |
| B(4)  | C(10) | B(2) | B(3)  | 36.76(8)    | B(3)  | B(8)  | B(9)  | C(11) | -2.06(12)   |
| C(11) | B(1)  | B(2) | C(10) | 35.69(7)    | B(7)  | B(8)  | B(9)  | C(11) | 61.03(11)   |
| B(6)  | B(1)  | B(2) | C(10) | 134.17(9)   | B(11) | B(8)  | B(9)  | C(11) | 98.16(9)    |
| B(10) | B(1)  | B(2) | C(10) | 96.00(9)    | B(3)  | B(8)  | B(9)  | B(4)  | 38.03(8)    |
| C(11) | B(1)  | B(2) | B(7)  | -61.04(10)  | B(7)  | B(8)  | B(9)  | B(4)  | 101.12(9)   |
| C(10) | B(1)  | B(2) | B(7)  | -96.74(9)   | B(11) | B(8)  | B(9)  | B(4)  | 138.25(9)   |
| B(6)  | B(1)  | B(2) | B(7)  | 37.44(8)    | B(4)  | B(8)  | B(9)  | B(11) | -138.25(9)  |
| B(10) | B(1)  | B(2) | B(7)  | -0.74(11)   | B(3)  | B(8)  | B(9)  | B(11) | -100.22(10) |
| C(11) | B(1)  | B(2) | B(6)  | -98.48(9)   | B(7)  | B(8)  | B(9)  | B(11) | -37.12(8)   |
| C(10) | B(1)  | B(2) | B(6)  | -134.17(9)  | B(4)  | B(8)  | B(9)  | B(10) | -100.68(9)  |
| B(10) | B(1)  | B(2) | B(6)  | -38.18(8)   | B(3)  | B(8)  | B(9)  | B(10) | -62.65(11)  |
| C(11) | B(1)  | B(2) | B(3)  | 2.45(11)    | B(7)  | B(8)  | B(9)  | B(10) | 0.45(12)    |
| C(10) | B(1)  | B(2) | B(3)  | -33.25(8)   | B(11) | B(8)  | B(9)  | B(10) | 37.57(8)    |
| B(6)  | B(1)  | B(2) | B(3)  | 100.93(9)   | C(10) | C(11) | B(10) | B(11) | -64.60(10)  |
| B(10) | B(1)  | B(2) | B(3)  | 62.75(11)   | B(9)  | C(11) | B(10) | B(11) | 40.40(8)    |
| C(9)  | C(10) | B(3) | B(4)  | -104.56(10) | B(4)  | C(11) | B(10) | B(11) | 4.50(12)    |
| C(11) | C(10) | B(3) | B(4)  | 38.69(8)    | B(1)  | C(11) | B(10) | B(11) | -102.69(9)  |
| B(2)  | C(10) | B(3) | B(4)  | 141.91(9)   | C(10) | C(11) | B(10) | B(1)  | 38.09(8)    |
| B(1)  | C(10) | B(3) | B(4)  | 105.56(9)   | B(9)  | C(11) | B(10) | B(1)  | 143.09(9)   |
| C(9)  | C(10) | B(3) | B(7)  | 153.44(9)   | B(4)  | C(11) | B(10) | B(1)  | 107.19(9)   |
| C(11) | C(10) | B(3) | B(7)  | -63.31(10)  | C(10) | C(11) | B(10) | B(9)  | -105.01(9)  |

|       |       |      |       |            |       |       |       |       |             |
|-------|-------|------|-------|------------|-------|-------|-------|-------|-------------|
| B(2)  | C(10) | B(3) | B(7)  | 39.90(8)   | B(4)  | C(11) | B(10) | B(9)  | -35.90(9)   |
| B(1)  | C(10) | B(3) | B(7)  | 3.56(11)   | B(1)  | C(11) | B(10) | B(9)  | -143.09(9)  |
| B(4)  | C(10) | B(3) | B(7)  | -102.00(9) | C(10) | C(11) | B(10) | B(6)  | -2.17(11)   |
| C(9)  | C(10) | B(3) | B(2)  | 113.53(10) | B(9)  | C(11) | B(10) | B(6)  | 102.84(9)   |
| C(11) | C(10) | B(3) | B(2)  | -103.22(9) | B(4)  | C(11) | B(10) | B(6)  | 66.93(11)   |
| B(1)  | C(10) | B(3) | B(2)  | -36.35(9)  | B(1)  | C(11) | B(10) | B(6)  | -40.25(8)   |
| B(4)  | C(10) | B(3) | B(2)  | -141.91(9) | C(10) | B(1)  | B(10) | C(11) | -34.02(7)   |
| C(9)  | C(10) | B(3) | B(8)  | -144.08(9) | B(6)  | B(1)  | B(10) | C(11) | -133.38(9)  |
| C(11) | C(10) | B(3) | B(8)  | -0.83(11)  | B(2)  | B(1)  | B(10) | C(11) | -95.20(9)   |
| B(2)  | C(10) | B(3) | B(8)  | 102.38(10) | C(11) | B(1)  | B(10) | B(11) | 96.15(9)    |
| B(1)  | C(10) | B(3) | B(8)  | 66.04(11)  | C(10) | B(1)  | B(10) | B(11) | 62.13(10)   |
| B(4)  | C(10) | B(3) | B(8)  | -39.53(8)  | B(6)  | B(1)  | B(10) | B(11) | -37.23(8)   |
| B(1)  | B(2)  | B(3) | C(10) | 33.64(8)   | B(2)  | B(1)  | B(10) | B(11) | 0.94(11)    |
| B(7)  | B(2)  | B(3) | C(10) | 134.08(9)  | C(11) | B(1)  | B(10) | B(9)  | 32.75(8)    |
| B(6)  | B(2)  | B(3) | C(10) | 96.79(9)   | C(10) | B(1)  | B(10) | B(9)  | -1.27(11)   |
| C(10) | B(2)  | B(3) | B(4)  | -34.23(8)  | B(6)  | B(1)  | B(10) | B(9)  | -100.63(9)  |
| B(1)  | B(2)  | B(3) | B(4)  | -0.59(12)  | B(2)  | B(1)  | B(10) | B(9)  | -62.46(11)  |
| B(7)  | B(2)  | B(3) | B(4)  | 99.85(10)  | C(11) | B(1)  | B(10) | B(6)  | 133.38(9)   |
| B(6)  | B(2)  | B(3) | B(4)  | 62.56(11)  | C(10) | B(1)  | B(10) | B(6)  | 99.36(9)    |
| C(10) | B(2)  | B(3) | B(7)  | -134.08(9) | B(2)  | B(1)  | B(10) | B(6)  | 38.18(8)    |
| B(1)  | B(2)  | B(3) | B(7)  | -100.44(9) | B(4)  | B(9)  | B(10) | C(11) | 32.49(8)    |
| B(6)  | B(2)  | B(3) | B(7)  | -37.29(8)  | B(11) | B(9)  | B(10) | C(11) | 133.38(9)   |
| C(10) | B(2)  | B(3) | B(8)  | -97.03(9)  | B(8)  | B(9)  | B(10) | C(11) | 95.54(9)    |
| B(1)  | B(2)  | B(3) | B(8)  | -63.39(11) | C(11) | B(9)  | B(10) | B(11) | -133.38(9)  |
| B(7)  | B(2)  | B(3) | B(8)  | 37.05(8)   | B(4)  | B(9)  | B(10) | B(11) | -100.89(10) |
| B(6)  | B(2)  | B(3) | B(8)  | -0.24(11)  | B(8)  | B(9)  | B(10) | B(11) | -37.85(8)   |
| B(10) | C(11) | B(4) | C(10) | -103.13(9) | C(11) | B(9)  | B(10) | B(1)  | -33.04(8)   |
| B(9)  | C(11) | B(4) | C(10) | -139.31(9) | B(4)  | B(9)  | B(10) | B(1)  | -0.55(12)   |
| B(1)  | C(11) | B(4) | C(10) | -32.51(8)  | B(11) | B(9)  | B(10) | B(1)  | 100.34(9)   |
| C(10) | C(11) | B(4) | B(8)  | 98.45(9)   | B(8)  | B(9)  | B(10) | B(1)  | 62.49(11)   |
| B(10) | C(11) | B(4) | B(8)  | -4.68(12)  | C(11) | B(9)  | B(10) | B(6)  | -96.06(9)   |
| B(9)  | C(11) | B(4) | B(8)  | -40.86(8)  | B(4)  | B(9)  | B(10) | B(6)  | -63.57(11)  |
| B(1)  | C(11) | B(4) | B(8)  | 65.94(11)  | B(11) | B(9)  | B(10) | B(6)  | 37.32(8)    |
| C(10) | C(11) | B(4) | B(9)  | 139.31(9)  | B(8)  | B(9)  | B(10) | B(6)  | -0.53(12)   |
| B(10) | C(11) | B(4) | B(9)  | 36.19(9)   | B(1)  | B(6)  | B(10) | C(11) | 40.20(8)    |
| B(1)  | C(11) | B(4) | B(9)  | 106.80(10) | B(2)  | B(6)  | B(10) | C(11) | 2.39(11)    |
| C(10) | C(11) | B(4) | B(3)  | 35.88(8)   | B(7)  | B(6)  | B(10) | C(11) | -60.77(11)  |
| B(10) | C(11) | B(4) | B(3)  | -67.25(11) | B(11) | B(6)  | B(10) | C(11) | -98.29(9)   |
| B(9)  | C(11) | B(4) | B(3)  | -103.43(9) | B(1)  | B(6)  | B(10) | B(11) | 138.49(9)   |
| B(1)  | C(11) | B(4) | B(3)  | 3.37(11)   | B(2)  | B(6)  | B(10) | B(11) | 100.68(9)   |
| C(9)  | C(10) | B(4) | C(11) | -110.44(9) | B(7)  | B(6)  | B(10) | B(11) | 37.52(8)    |
| B(3)  | C(10) | B(4) | C(11) | 137.75(9)  | B(2)  | B(6)  | B(10) | B(1)  | -37.81(8)   |
| B(2)  | C(10) | B(4) | C(11) | 100.71(9)  | B(7)  | B(6)  | B(10) | B(1)  | -100.97(10) |
| B(1)  | C(10) | B(4) | C(11) | 31.93(8)   | B(11) | B(6)  | B(10) | B(1)  | -138.49(9)  |
| C(9)  | C(10) | B(4) | B(8)  | 151.87(9)  | B(1)  | B(6)  | B(10) | B(9)  | 101.37(9)   |
| C(11) | C(10) | B(4) | B(8)  | -97.69(9)  | B(2)  | B(6)  | B(10) | B(9)  | 63.56(11)   |
| B(3)  | C(10) | B(4) | B(8)  | 40.05(8)   | B(7)  | B(6)  | B(10) | B(9)  | 0.40(12)    |
| B(2)  | C(10) | B(4) | B(8)  | 3.02(11)   | B(11) | B(6)  | B(10) | B(9)  | -37.12(8)   |
| B(1)  | C(10) | B(4) | B(8)  | -65.76(11) | C(11) | B(9)  | B(11) | B(10) | 39.45(8)    |
| C(9)  | C(10) | B(4) | B(9)  | -145.51(9) | B(4)  | B(9)  | B(11) | B(10) | 100.85(9)   |
| C(11) | C(10) | B(4) | B(9)  | -35.07(8)  | B(8)  | B(9)  | B(11) | B(10) | 138.01(9)   |
| B(3)  | C(10) | B(4) | B(9)  | 102.68(9)  | C(11) | B(9)  | B(11) | B(7)  | -61.10(11)  |
| B(2)  | C(10) | B(4) | B(9)  | 65.64(11)  | B(4)  | B(9)  | B(11) | B(7)  | 0.30(12)    |
| B(1)  | C(10) | B(4) | B(9)  | -3.14(11)  | B(8)  | B(9)  | B(11) | B(7)  | 37.46(8)    |
| C(9)  | C(10) | B(4) | B(3)  | 111.81(10) | B(10) | B(9)  | B(11) | B(7)  | -100.55(9)  |
| C(11) | C(10) | B(4) | B(3)  | -137.75(9) | C(11) | B(9)  | B(11) | B(6)  | 2.24(11)    |
| B(2)  | C(10) | B(4) | B(3)  | -37.04(9)  | B(4)  | B(9)  | B(11) | B(6)  | 63.64(11)   |
| B(1)  | C(10) | B(4) | B(3)  | -105.82(9) | B(8)  | B(9)  | B(11) | B(6)  | 100.81(9)   |
| C(10) | B(3)  | B(4) | C(11) | -35.31(7)  | B(10) | B(9)  | B(11) | B(6)  | -37.20(8)   |

|       |      |      |       |             |       |       |       |       |             |
|-------|------|------|-------|-------------|-------|-------|-------|-------|-------------|
| B(7)  | B(3) | B(4) | C(11) | 61.69(10)   | C(11) | B(9)  | B(11) | B(8)  | -98.56(9)   |
| B(2)  | B(3) | B(4) | C(11) | -1.54(11)   | B(4)  | B(9)  | B(11) | B(8)  | -37.17(8)   |
| B(8)  | B(3) | B(4) | C(11) | 99.08(9)    | B(10) | B(9)  | B(11) | B(8)  | -138.01(9)  |
| B(7)  | B(3) | B(4) | C(10) | 97.00(9)    | C(11) | B(10) | B(11) | B(9)  | -39.76(8)   |
| B(2)  | B(3) | B(4) | C(10) | 33.77(8)    | B(1)  | B(10) | B(11) | B(9)  | -101.63(9)  |
| B(8)  | B(3) | B(4) | C(10) | 134.39(9)   | B(6)  | B(10) | B(11) | B(9)  | -138.49(9)  |
| C(10) | B(3) | B(4) | B(8)  | -134.39(9)  | C(11) | B(10) | B(11) | B(7)  | 61.09(11)   |
| B(7)  | B(3) | B(4) | B(8)  | -37.39(8)   | B(1)  | B(10) | B(11) | B(7)  | -0.78(12)   |
| B(2)  | B(3) | B(4) | B(8)  | -100.61(10) | B(9)  | B(10) | B(11) | B(7)  | 100.85(10)  |
| C(10) | B(3) | B(4) | B(9)  | -96.18(9)   | B(6)  | B(10) | B(11) | B(7)  | -37.64(9)   |
| B(7)  | B(3) | B(4) | B(9)  | 0.82(11)    | C(11) | B(10) | B(11) | B(6)  | 98.73(9)    |
| B(2)  | B(3) | B(4) | B(9)  | -62.40(11)  | B(1)  | B(10) | B(11) | B(6)  | 36.85(8)    |
| B(8)  | B(3) | B(4) | B(9)  | 38.21(8)    | B(9)  | B(10) | B(11) | B(6)  | 138.49(9)   |
| C(11) | B(1) | B(6) | B(2)  | 98.19(9)    | C(11) | B(10) | B(11) | B(8)  | -2.38(11)   |
| C(10) | B(1) | B(6) | B(2)  | 39.33(8)    | B(1)  | B(10) | B(11) | B(8)  | -64.25(11)  |
| B(10) | B(1) | B(6) | B(2)  | 137.57(9)   | B(9)  | B(10) | B(11) | B(8)  | 37.38(8)    |
| C(11) | B(1) | B(6) | B(7)  | 60.81(10)   | B(6)  | B(10) | B(11) | B(8)  | -101.11(10) |
| C(10) | B(1) | B(6) | B(7)  | 1.96(11)    | B(2)  | B(7)  | B(11) | B(9)  | 63.90(11)   |
| B(2)  | B(1) | B(6) | B(7)  | -37.38(8)   | B(6)  | B(7)  | B(11) | B(9)  | 101.25(9)   |
| B(10) | B(1) | B(6) | B(7)  | 100.19(10)  | B(3)  | B(7)  | B(11) | B(9)  | 0.21(12)    |
| C(11) | B(1) | B(6) | B(10) | -39.38(8)   | B(8)  | B(7)  | B(11) | B(9)  | -37.29(8)   |
| C(10) | B(1) | B(6) | B(10) | -98.24(9)   | B(2)  | B(7)  | B(11) | B(10) | 0.33(12)    |
| B(2)  | B(1) | B(6) | B(10) | -137.57(9)  | B(6)  | B(7)  | B(11) | B(10) | 37.69(9)    |
| C(11) | B(1) | B(6) | B(11) | -2.38(11)   | B(3)  | B(7)  | B(11) | B(10) | -63.35(11)  |
| C(10) | B(1) | B(6) | B(11) | -61.23(10)  | B(8)  | B(7)  | B(11) | B(10) | -100.86(10) |
| B(2)  | B(1) | B(6) | B(11) | -100.57(9)  | B(2)  | B(7)  | B(11) | B(6)  | -37.36(8)   |
| B(10) | B(1) | B(6) | B(11) | 37.00(8)    | B(3)  | B(7)  | B(11) | B(6)  | -101.04(9)  |
| C(10) | B(2) | B(6) | B(1)  | -39.71(8)   | B(8)  | B(7)  | B(11) | B(6)  | -138.55(9)  |
| B(7)  | B(2) | B(6) | B(1)  | -138.09(9)  | B(2)  | B(7)  | B(11) | B(8)  | 101.19(10)  |
| B(3)  | B(2) | B(6) | B(1)  | -100.81(9)  | B(6)  | B(7)  | B(11) | B(8)  | 138.55(9)   |
| C(10) | B(2) | B(6) | B(7)  | 98.38(9)    | B(3)  | B(7)  | B(11) | B(8)  | 37.51(8)    |
| B(1)  | B(2) | B(6) | B(7)  | 138.09(9)   | B(1)  | B(6)  | B(11) | B(9)  | 0.10(12)    |
| B(3)  | B(2) | B(6) | B(7)  | 37.28(8)    | B(2)  | B(6)  | B(11) | B(9)  | -63.24(11)  |
| C(10) | B(2) | B(6) | B(10) | -1.80(11)   | B(7)  | B(6)  | B(11) | B(9)  | -100.43(10) |
| B(1)  | B(2) | B(6) | B(10) | 37.91(8)    | B(10) | B(6)  | B(11) | B(9)  | 37.30(8)    |
| B(7)  | B(2) | B(6) | B(10) | -100.18(9)  | B(1)  | B(6)  | B(11) | B(10) | -37.20(8)   |
| B(3)  | B(2) | B(6) | B(10) | -62.90(11)  | B(2)  | B(6)  | B(11) | B(10) | -100.53(9)  |
| C(10) | B(2) | B(6) | B(11) | 61.23(10)   | B(7)  | B(6)  | B(11) | B(10) | -137.73(9)  |
| B(1)  | B(2) | B(6) | B(11) | 100.95(9)   | B(1)  | B(6)  | B(11) | B(7)  | 100.53(10)  |
| B(7)  | B(2) | B(6) | B(11) | -37.15(8)   | B(2)  | B(6)  | B(11) | B(7)  | 37.20(8)    |
| B(3)  | B(2) | B(6) | B(11) | 0.13(11)    | B(10) | B(6)  | B(11) | B(7)  | 137.73(9)   |
| C(10) | B(2) | B(7) | B(11) | -61.72(11)  | B(1)  | B(6)  | B(11) | B(8)  | 63.36(11)   |
| B(1)  | B(2) | B(7) | B(11) | 0.25(12)    | B(2)  | B(6)  | B(11) | B(8)  | 0.02(11)    |
| B(6)  | B(2) | B(7) | B(11) | 37.50(9)    | B(7)  | B(6)  | B(11) | B(8)  | -37.17(9)   |
| B(3)  | B(2) | B(7) | B(11) | -100.91(10) | B(10) | B(6)  | B(11) | B(8)  | 100.56(9)   |
| C(10) | B(2) | B(7) | B(6)  | -99.21(9)   | B(4)  | B(8)  | B(11) | B(9)  | 37.33(8)    |
| B(1)  | B(2) | B(7) | B(6)  | -37.24(8)   | B(3)  | B(8)  | B(11) | B(9)  | 100.86(9)   |
| B(3)  | B(2) | B(7) | B(6)  | -138.41(9)  | B(7)  | B(8)  | B(11) | B(9)  | 138.11(9)   |
| C(10) | B(2) | B(7) | B(3)  | 39.19(8)    | B(4)  | B(8)  | B(11) | B(10) | -0.26(12)   |
| B(1)  | B(2) | B(7) | B(3)  | 101.16(9)   | B(9)  | B(8)  | B(11) | B(10) | -37.59(8)   |
| B(6)  | B(2) | B(7) | B(3)  | 138.41(9)   | B(3)  | B(8)  | B(11) | B(10) | 63.27(11)   |
| C(10) | B(2) | B(7) | B(8)  | 2.16(11)    | B(7)  | B(8)  | B(11) | B(10) | 100.52(10)  |
| B(1)  | B(2) | B(7) | B(8)  | 64.13(11)   | B(4)  | B(8)  | B(11) | B(7)  | -100.78(9)  |
| B(6)  | B(2) | B(7) | B(8)  | 101.38(10)  | B(9)  | B(8)  | B(11) | B(7)  | -138.11(9)  |
| B(3)  | B(2) | B(7) | B(8)  | -37.03(8)   | B(3)  | B(8)  | B(11) | B(7)  | -37.24(8)   |
| B(1)  | B(6) | B(7) | B(2)  | 37.39(8)    | B(4)  | B(8)  | B(11) | B(6)  | -63.70(11)  |
| B(10) | B(6) | B(7) | B(2)  | 100.82(9)   | B(9)  | B(8)  | B(11) | B(6)  | -101.04(9)  |
| B(11) | B(6) | B(7) | B(2)  | 138.30(9)   | B(3)  | B(8)  | B(11) | B(6)  | -0.17(12)   |
| B(1)  | B(6) | B(7) | B(11) | -100.92(9)  | B(7)  | B(8)  | B(11) | B(6)  | 37.07(8)    |

|                       |                       |                       |       |            |
|-----------------------|-----------------------|-----------------------|-------|------------|
| B(2)                  | B(6)                  | B(7)                  | B(11) | -138.30(9) |
| Symmetry Operators    |                       |                       |       |            |
| (1) x, y, z           | (2) -x+1/2, -y+1/2, z | (3) -x, y+1/2, -z+1/2 |       |            |
| (4) x+1/2, -y, -z+1/2 | (5) -x, -y, -z        | (6) x-1/2, y-1/2, -z  |       |            |
| (7) x, -y-1/2, z-1/2  | (8) -x-1/2, y, z-1/2  |                       |       |            |

**Table 16.** Hydrogen Bond Geometry

| Donor                 | Hydrogen              | Acceptor              | D-H ( Å ) | H-A ( Å ) | D-A ( Å )  | DHA Angle ( ° ) |
|-----------------------|-----------------------|-----------------------|-----------|-----------|------------|-----------------|
| N(1)                  | H(1D)                 | O(2) 7_576            | 0.88      | 2.10      | 2.9033(11) | 151.3           |
| Symmetry Operators    |                       |                       |           |           |            |                 |
| (1) x, y, z           | (2) -x+1/2, -y+1/2, z | (3) -x, y+1/2, -z+1/2 |           |           |            |                 |
| (4) x+1/2, -y, -z+1/2 | (5) -x, -y, -z        | (6) x-1/2, y-1/2, -z  |           |           |            |                 |
| (7) x, -y-1/2, z-1/2  | (8) -x-1/2, y, z-1/2  |                       |           |           |            |                 |

**Table 17.** Hydrogen Bond Lengths (Å)

| Atom               | Atom                  | Distance              | Atom                  | Atom   | Distance  |
|--------------------|-----------------------|-----------------------|-----------------------|--------|-----------|
| C(1)               | H(1A)                 | 0.9800                | C(1)                  | H(1B)  | 0.9800    |
| C(1)               | H(1C)                 | 0.9800                | C(3)                  | H(3A)  | 0.9500    |
| C(6)               | H(6A)                 | 0.9500                | C(7)                  | H(7A)  | 0.9500    |
| N(1)               | H(1D)                 | 0.8800                | C(9)                  | H(9A)  | 0.9900    |
| C(9)               | H(9B)                 | 0.9900                | C(11)                 | H(11A) | 0.965(15) |
| B(1)               | H(1)                  | 1.079(14)             | B(2)                  | H(2)   | 1.094(15) |
| B(3)               | H(3)                  | 1.071(15)             | B(4)                  | H(4)   | 1.088(14) |
| B(6)               | H(6)                  | 1.081(14)             | B(7)                  | H(7)   | 1.096(15) |
| B(8)               | H(8)                  | 1.091(15)             | B(9)                  | H(9)   | 1.078(15) |
| B(10)              | H(10)                 | 1.061(14)             | B(11)                 | H(11)  | 1.080(14) |
| Symmetry Operators |                       |                       |                       |        |           |
| (1) x, y, z        | (2) -x+1/2, -y+1/2, z | (3) -x, y+1/2, -z+1/2 | (4) x+1/2, -y, -z+1/2 |        |           |
| (5) -x, -y, -z     | (6) x-1/2, y-1/2, -z  | (7) x, -y-1/2, z-1/2  | (8) -x-1/2, y, z-1/2  |        |           |

**Table 18.** Hydrogen Bond Angles ( ° )

| Atom  | Atom  | Atom   | Angle    | Atom  | Atom  | Atom  | Angle    |
|-------|-------|--------|----------|-------|-------|-------|----------|
| O(1)  | C(1)  | H(1A)  | 109.5    | B(2)  | B(3)  | H(3)  | 121.2(8) |
| O(1)  | C(1)  | H(1B)  | 109.5    | B(8)  | B(3)  | H(3)  | 126.2(8) |
| H(1A) | C(1)  | H(1B)  | 109.5    | C(11) | B(4)  | H(4)  | 117.2(8) |
| O(1)  | C(1)  | H(1C)  | 109.5    | C(10) | B(4)  | H(4)  | 116.8(7) |
| H(1A) | C(1)  | H(1C)  | 109.5    | B(8)  | B(4)  | H(4)  | 132.3(8) |
| H(1B) | C(1)  | H(1C)  | 109.5    | B(9)  | B(4)  | H(4)  | 124.1(7) |
| C(4)  | C(3)  | H(3A)  | 119.6    | B(3)  | B(4)  | H(4)  | 124.8(7) |
| C(2)  | C(3)  | H(3A)  | 119.6    | B(1)  | B(6)  | H(6)  | 120.7(7) |
| C(5)  | C(6)  | H(6A)  | 119.6    | B(2)  | B(6)  | H(6)  | 121.5(8) |
| C(7)  | C(6)  | H(6A)  | 119.6    | B(7)  | B(6)  | H(6)  | 122.7(7) |
| C(2)  | C(7)  | H(7A)  | 120.3    | B(10) | B(6)  | H(6)  | 121.8(8) |
| C(6)  | C(7)  | H(7A)  | 120.3    | B(11) | B(6)  | H(6)  | 122.6(8) |
| C(8)  | N(1)  | H(1D)  | 119.2    | B(2)  | B(7)  | H(7)  | 120.8(8) |
| C(9)  | N(1)  | H(1D)  | 119.2    | B(11) | B(7)  | H(7)  | 122.0(8) |
| N(1)  | C(9)  | H(9A)  | 108.7    | B(6)  | B(7)  | H(7)  | 121.0(8) |
| C(10) | C(9)  | H(9A)  | 108.7    | B(3)  | B(7)  | H(7)  | 121.7(8) |
| N(1)  | C(9)  | H(9B)  | 108.7    | B(8)  | B(7)  | H(7)  | 122.1(8) |
| C(10) | C(9)  | H(9B)  | 108.7    | B(4)  | B(8)  | H(8)  | 119.4(8) |
| H(9A) | C(9)  | H(9B)  | 107.6    | B(9)  | B(8)  | H(8)  | 123.1(8) |
| C(10) | C(11) | H(11A) | 114.7(9) | B(3)  | B(8)  | H(8)  | 119.4(8) |
| B(10) | C(11) | H(11A) | 122.0(9) | B(7)  | B(8)  | H(8)  | 122.6(8) |
| B(9)  | C(11) | H(11A) | 122.2(9) | B(11) | B(8)  | H(8)  | 124.9(8) |
| B(4)  | C(11) | H(11A) | 115.3(9) | C(11) | B(9)  | H(9)  | 116.7(8) |
| B(1)  | C(11) | H(11A) | 115.1(9) | B(4)  | B(9)  | H(9)  | 117.1(8) |
| C(11) | B(1)  | H(1)   | 116.7(7) | B(11) | B(9)  | H(9)  | 130.0(8) |
| C(10) | B(1)  | H(1)   | 118.0(8) | B(8)  | B(9)  | H(9)  | 128.4(8) |
| B(6)  | B(1)  | H(1)   | 131.9(8) | B(10) | B(9)  | H(9)  | 119.4(8) |
| B(2)  | B(1)  | H(1)   | 126.4(7) | C(11) | B(10) | H(10) | 116.5(8) |
| B(10) | B(1)  | H(1)   | 122.3(7) | B(11) | B(10) | H(10) | 130.3(8) |
| C(10) | B(2)  | H(2)   | 117.8(8) | B(1)  | B(10) | H(10) | 116.7(8) |
| B(1)  | B(2)  | H(2)   | 119.8(8) | B(9)  | B(10) | H(10) | 119.7(8) |
| B(7)  | B(2)  | H(2)   | 127.4(8) | B(6)  | B(10) | H(10) | 128.0(8) |
| B(6)  | B(2)  | H(2)   | 128.1(8) | B(9)  | B(11) | H(11) | 121.5(8) |
| B(3)  | B(2)  | H(2)   | 118.3(8) | B(10) | B(11) | H(11) | 122.2(7) |
| C(10) | B(3)  | H(3)   | 117.4(8) | B(7)  | B(11) | H(11) | 121.8(7) |
| B(4)  | B(3)  | H(3)   | 116.8(8) | B(6)  | B(11) | H(11) | 121.9(8) |
| B(7)  | B(3)  | H(3)   | 129.7(8) | B(8)  | B(11) | H(11) | 121.3(7) |

## Symmetry Operators

- |                |                       |                       |                       |
|----------------|-----------------------|-----------------------|-----------------------|
| (1) x, y, z    | (2) -x+1/2, -y+1/2, z | (3) -x, y+1/2, -z+1/2 | (4) x+1/2, -y, -z+1/2 |
| (5) -x, -y, -z | (6) x-1/2, y-1/2, -z  | (7) x, -y-1/2, z-1/2  | (8) -x-1/2, y, z-1/2  |

## References

1. Armarego, W. L. F.; Chai, C. L. L., *Purification of Laboratory Materials*. 5th ed.; 2003; Vol. 5th Ed.
2. Gunosewoyo, H. Polycarbocyclic compounds as novel P2X7 receptor ligands. Sydney University, 2009.
3. Gunosewoyo, H.; Guo, J. L.; Bennett, M. R.; Coster, M. J.; Kassiou, M., Cubyl amides: Novel P2X7 receptor antagonists. *Bioorg. Med. Chem. Lett.* **2008**, *18* (13), 3720-3723.
4. Ohmura, R.; Takahata, M.; Togo, H., Metal-free one-pot oxidative conversion of benzylic alcohols and benzylic halides into aromatic amides with molecular iodine in aq ammonia, and hydrogen peroxide. *Tetrahedron Lett.* **2010**, *51* (33), 4378-4381.
5. Eaton, P. E.; Nordari, N.; Tsanaktsidis, J.; Upadhyaya, S. P., Barton Decarboxylation of Cubane-1,4-dicarboxylic Acid: Optimized Procedures for Cubanecarboxylic Acid and Cubane. *Synthesis* **1995**, *1995* (5), 501-502.
6. Ko, E. J.; Savage, G. P.; Williams, C. M.; Tsanaktsidis, J., Reducing the Cost, Smell, and Toxicity of the Barton Reductive Decarboxylation: Chloroform as the Hydrogen Atom Source. *Org. Lett.* **2011**, *13* (8), 1944-1947.
7. Zhou, J. J. P.; Li, J.; Upadhyaya, S.; Eaton, P. E.; Silverman, R. B., 4-Substituted Cubylcarbinylamines: A New Class of Mechanism-Based Monoamine Oxidase B Inactivators. *J. Med. Chem.* **1997**, *40* (7), 1165-1168.
8. Marchand, A. P.; Allen, R. W., Improved synthesis of pentacyclo[5.4.0.02,6.03,10.05,9]undecane. *J. Org. Chem.* **1974**, *39* (11), 1596-1596.
9. Wenkert, E.; Yoder, J. E., Zinc reduction of  $\gamma$ -diketones. *J. Org. Chem.* **1970**, *35* (9), 2986-2989.
10. Bocknack, B. M.; Wang, L.-C.; Hughes, F. W.; Krische, M. J., Chiral  $\beta$ -diketonate ligands of 'pseudo planar chiral' topology: enantioselective synthesis and transition metal complexation. *Tetrahedron* **2005**, *61* (26), 6266-6275.
11. Eaton, P. E.; Hudson, R. A.; Giordano, C., Trishomocubanone (pentacyclo[6,3,0,02,6,03,10,05,9]undecan-4-one). *J. Chem. Soc., Chem. Commun.* **1974**, *23*, 978-978.
12. Wilson, J. G.; Anisuzzaman, A. K. M.; Alam, F.; Soloway, A. H., Development of carborane synthons: synthesis and chemistry of (aminoalkyl)carboranes. *Inorg. Chem.* **1992**, *31* (10), 1955-1958.
13. Sangster, J., Octanol-Water Partition Coefficients of Simple Organic Compounds. *J. Phys. Chem. Ref. Data* **1989**, *18* (3), 1111-1229.
14. Humphreys, B. D.; Dubyak, G. R., Induction of the P2z/P2X7 nucleotide receptor and associated phospholipase D activity by lipopolysaccharide and IFN- $\gamma$  in the human THP-1 monocytic cell line. *J. Immunol.* **1996**, *157* (12), 5627-37.
15. Boucher, A. A.; Hunt, G. E.; Micheau, J.; Huang, X.; McGregor, I. S.; Karl, T.; Arnold, J. C., The schizophrenia susceptibility gene neuregulin 1 modulates tolerance to the effects of cannabinoids. *Int J Neuropsychopharmacol* **2011**, *14* (5), 631-43.
16. Boucher, A. A.; Arnold, J. C.; Hunt, G. E.; Spiro, A.; Spencer, J.; Brown, C.; McGregor, I. S.; Bennett, M. R.; Kassiou, M., Resilience and reduced c-Fos expression in P2X7 receptor knockout mice exposed to repeated forced swim test. *Neuroscience* **2011**, *189*, 170-177.
17. Porsolt, R. D.; Bertin, A.; Jalfre, M., Behavioral despair in mice: a primary screening test for antidepressants. *Arch. Int. Pharmacodyn. Ther.* **1977**, *229* (2), 327-36.
18. Lim, B. K.; Huang, K. W.; Grueter, B. A.; Rothwell, P. E.; Malenka, R. C., Anhedonia requires MC4R-mediated synaptic adaptations in nucleus accumbens. *Nature* **2012**, *487* (7406), 183-189.
19. *CrysAlisPro*, 1.171.35.11; Oxford Diffraction Ltd.: Agilent Technologies, 2011.
20. Hubschle, C. B.; Sheldrick, G. M.; Dittrich, B., ShelXle: a Qt graphical user interface for SHELXL. *J. Appl. Crystallogr.* **2011**, *44* (6), 1281-1284.
21. Farrugia, L. J., WinGX. *J. Appl. Crystallogr.* **1999**, *32*, 837-838.
22. Altomare, A.; Burla, M. C.; Camalli, M.; Cascarano, G. L.; Giacovazzo, C.; Guagliardi, A.; Moliterni, A. G. G.; Polidori, G.; Spagna, R., SIR97: a new tool for crystal structure determination and refinement. *J. Appl. Crystallogr.* **1999**, *32* (1), 115-119.
23. Sheldrick, G. M. *SHELX97 Programs for Crystal Structure Analysis*, Institute of Inorganic Chemistry, Georg-August-University, Tammannstr. 4 D-37077 Göttingen, Germany: 1998.
24. (a) Johnson, C. K. *ORTEPII. Report ORNL-5138*, Oak Ridge National Library, Oak Ridge, Tennessee: 1976; (b) Hall, S. R.; du Boulay, D. J.; Olthof-Hazekamp, R. *Xtal3.6 system*, University of Western Australia, 1999.
25. Bruker *SMART, SAINT and XPREP. Area detector control and data integration and reduction software*, Bruker Analytical X-ray Instruments Inc.: Madison, Wisconsin, USA, 1995.
26. Sheldrick, G. M. *SHELXTL-Plus. Graphical interface for crystal structure solution and refinement.*, Bruker Analytical X-ray Instruments Inc.: Madison, Wisconsin, USA, 1995.
27. Farrugia, L., ORTEP-3 for Windows - a version of ORTEP-III with a Graphical User Interface (GUI). *J. Appl. Crystallogr.* **1997**, *30* (5 Part 1), 565.
